# Supplementary material
Source: publisher figshare collection journal article supplement (https://acs.figshare.com/ndownloader/files/25996495)

# Visible Light Induced Reduction and Pinacol Coupling of Aldehydes and Ketones Catalyzed by Core-Shell Quantum Dots

Zi-Wei Xi,<sup>a#</sup> Lei Yang,<sup>b#</sup> Dan-Yan Wang,<sup>a</sup> Chuan-Wei Feng,<sup>a</sup> Yufeng Qin,<sup>c</sup> Yong-Miao Shen,<sup>\*a</sup> Chaodan Pu,<sup>\*c</sup> and Xiaogang Peng<sup>b</sup>

a. Department of Chemistry, Key Laboratory of Surface & Interface Science of Polymer Materials of Zhejiang Province, Zhejiang Sci-Tech University, Hangzhou 310018, China

b. Center for Chemistry of Novel & High-Performance Materials, Department of Chemistry, Zhejiang University, Hangzhou 310027, PR China

c. School of Physical Science and Technology, Shanghai Tech University, Shanghai 201210, PR China

\*Correspondence to: Yong-Miao Shen

E-mail: shenym@zstu.edu.cn, puchd@shanghaitech.edu.cn

## Supplementary Informations

|                                                                            |     |
|----------------------------------------------------------------------------|-----|
| 1. Absorption and photoluminescence spectra of CdSe and CdSe/3CdS QDs..... | S1  |
| 2. Transient photoluminescence spectra of CdSe/3CdS QDs.....               | S2  |
| 3. Comparison of TON values of different catalysts.....                    | S2  |
| 4. Absorption and photoluminescence spectra of CdS QDs.....                | S4  |
| 5. NMR monitoring.....                                                     | S4  |
| 6. Recycling of quantum dots .....                                         | S6  |
| 7. TEM images of CdSe/3CdS before and after the reaction.....              | S7  |
| 8. UV image of CdSe/3CdS before and after the reaction.....                | S7  |
| 9. XPS image of CdSe/3CdS before and after the reaction .....              | S8  |
| 10. Photoreaction setup for scale-up reaction .....                        | S8  |
| 11. Photoredox transfer hydrogenation under solar irradiation.....         | S9  |
| 12. Fluorescence quenching Studies.....                                    | S9  |
| 13. The radical trapping Experiments.....                                  | S10 |
| 14. Micro-injector setup.....                                              | S11 |
| 15. X-ray crystallographic of 7b .....                                     | S11 |
| 16. <sup>1</sup> H NMR and <sup>13</sup> C NMR .....                       | S12 |

### 1. Absorption and photoluminescence spectra of CdSe and CdSe/3CdS QDs

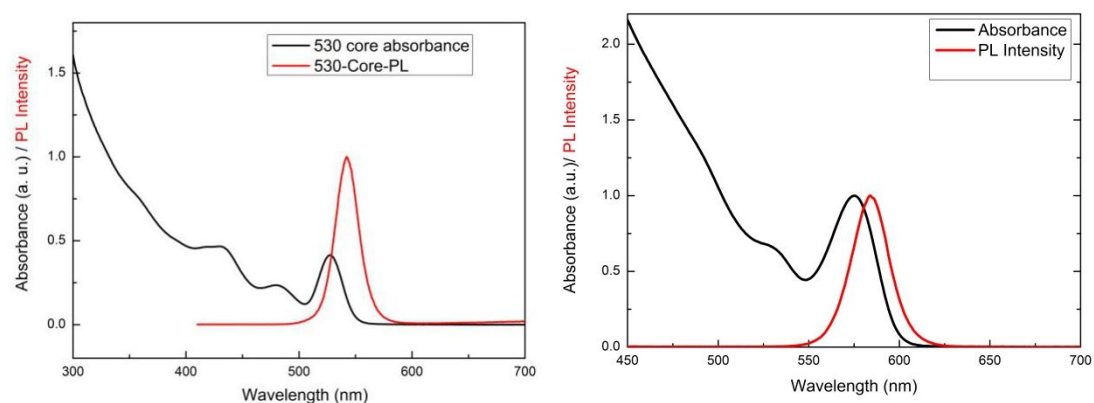

Figure S1 Absorption and photoluminescence spectra of CdSe (left) and CdSe with 3 monolayer CdS shells (right).

### 2. Transient photoluminescence spectra of CdSe/3CdS QDs

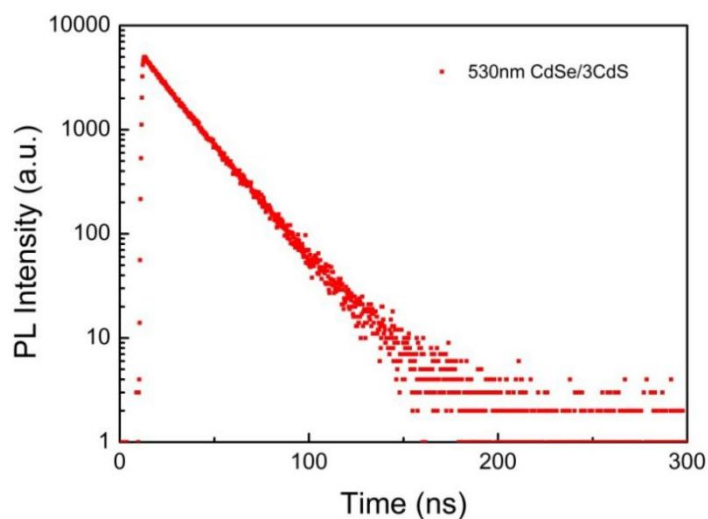

Figure S2 Transient Photoluminescence spectra of CdSe/ 3CdS QDs

### 3. Comparison of TON values of different catalysts

(1) Reduction of benzaldehyde

Table S1

| Entry            | Catalyst                                         | Conditions                                   | Solvent    | Time     | Yield(%) | TON   |
|------------------|--------------------------------------------------|----------------------------------------------|------------|----------|----------|-------|
| 1                | CdSe/CdS                                         | p-Toluenethiol,<br>CH <sub>3</sub> COOCs, Ar | toluene    | 8 h      | 90 (GC)  | 40000 |
| 2 <sup>[1]</sup> | Ru(II) complexes                                 | KOH, 80 °C                                   | 2-propanol | 0.5 h    | 100 (GC) | 1000  |
| 3 <sup>[2]</sup> | Ru/AlO(OH)                                       | HCOOK, water, N <sub>2</sub> ,<br>100 °C     | DMF        | 2 h      | 100      | 202   |
| 4 <sup>[3]</sup> | Ru(II)( $\eta^6$ - <i>p</i> -cymene) complexes   | KOH, 82 °C                                   | 2-propanol | 12 h     | 95       | 956   |
| 5 <sup>[4]</sup> | Iridium catalysts                                | HCOOH, 80 °C                                 | water      | 2<br>min | 99       | 4950  |
| 6 <sup>[5]</sup> | MOA-Rh-2                                         | PhSiH <sub>3</sub> , 25 °C                   | DCM        | 5-7 h    | >99      | 250   |
| 7 <sup>[6]</sup> | [Fe(PNP <sup>Me</sup> - <i>i</i> Pr)(CO)(H)(Br)] | DBU, H <sub>2</sub> (30 bar),                | EtOH       | 16 h     | 96 (H-   | 20000 |

|                   |                                                  |                                |                  |     |               |       |
|-------------------|--------------------------------------------------|--------------------------------|------------------|-----|---------------|-------|
|                   | complex                                          | 40 °C                          |                  |     | NMR)          |       |
| 8 <sup>[7]</sup>  | Pd-NPs                                           | H <sub>2</sub> (1 atm), rt     | H <sub>2</sub> O | 2 h | >99<br>(HPLC) | 5688  |
| 9 <sup>[8]</sup>  | Pd/TiO <sub>2</sub>                              | H <sub>2</sub> (1atm), 25 °C   | ethanol          | 1 h | 99            | 2797  |
| 10 <sup>[9]</sup> | LaCu <sub>0.67</sub> Si <sub>1.33</sub> catalyst | H <sub>2</sub> (3 MPa), 120 °C | methanol         | 3 h | 99 (GC)       | 54750 |

## (2) Coupling of benzophenone to pinacol

Table S2

| Entry             | Catalyst                                                       | Conditions                                   | Solvent            | Time | Yield(%) | TON    |
|-------------------|----------------------------------------------------------------|----------------------------------------------|--------------------|------|----------|--------|
| 1                 | CdSe/CdS                                                       | p-Toluenethiol, CH <sub>3</sub> COOCs,<br>Ar | toluene            | 8 h  | 92       | 400000 |
| 2 <sup>[10]</sup> | Ir[FCF <sub>3</sub> ppy] <sub>2</sub> (dtbbpy)]PF <sub>6</sub> | NBu <sub>3</sub> , rt, Ar                    | degassed<br>DMF    | 15 h | 87       | 87     |
| 3 <sup>[11]</sup> | RuDmb                                                          | 100 mM Asc <sup>2-</sup> , pH12.7            | aqueous<br>media   | 3 h  | 65       | 65     |
| 4 <sup>[12]</sup> | coumarins                                                      | Et <sub>3</sub> N, rt                        | DMF                | 36 h | 50       | 10     |
| 5 <sup>[13]</sup> | Perylene                                                       | <i>i</i> -Pr <sub>2</sub> NEt, rt, Ar        | CH <sub>3</sub> CN | 16 h | 38       | 3      |

## Reference

- [1] Dayan, S.; Kayaci, N.; Kalaycioglu Ozpozan, N.; Dayan, O. SBA-15-supported N-coordinate ruthenium(II) materials bearing sulfonamide-type ligands: Effect of ligand backbones on catalytic transfer hydrogenation of ketones and aldehydes. *Appl. Organomet. Chem.* **2017**, *31*, e3699.
- [2] Gao, Y.; Jaenicke, S.; Chuah, G.-K. Highly efficient transfer hydrogenation of aldehydes and ketones using potassium formate over AlO(OH)-entrapped ruthenium catalysts. *Appl. Catal., A.* **2014**, *484*, 51-58.
- [3] Sathishkumar, P. N.; Raveendran, N.; Bhuvanesh, N. S. P.; Karvembu, R. Chemoselective transfer hydrogenation of nitroarenes, ketones and aldehydes using acylthiourea based Ru(II)(p-cymene) complexes as precatalysts. *J. Org. Chem.* **2018**, *876*, 57-65.
- [4] Yang, Z.; Zhu, Z.; Luo, R.; Qiu, X.; Liu, J.-t.; Yang, J.-K.; Tang, W. Iridium-catalyzed highly efficient chemoselective reduction of aldehydes in water using formic acid as the hydrogen source. *Green Chem.* **2017**, *19*, 3296-3301.
- [5] Liu G.; Wang Y.; Zhu B.; Zhang L.; Su C. A porous metal-organic aerogel based on dirhodium paddle-wheels as an efficient and stable heterogeneous catalyst towards the reduction reaction of aldehydes and ketones. *New J. Chem.* **2018**, *42*, 11358-11363.
- [6] Gorgas, N.; Stoger, B.; Veiros, L. F.; Kirchner, K. Highly efficient and selective hydrogenation of aldehydes: A well-defined Fe(II) catalyst exhibits noble-metal activity. *ACS Catal.* **2016**, *6*, 2664-2672.
- [7] Liu, Y.; He, S.; Quan, Z.; Cai, H.; Zhao, Y.; Wang, B. Mild palladium-catalysed highly efficient hydrogenation of C≡N, C-NO<sub>2</sub>, and C=O bonds using H<sub>2</sub> of 1 atm in H<sub>2</sub>O. *Green Chem.* **2019**, *21*, 830-838.
- [8] Kuai, L.; Chen, Z.; Liu, S.; Kan, E.; Geng, B. Titania supported synergistic palladium single atoms and nanoparticles for room temperature ketone and aldehydes hydrogenation. *Nat. Commun.* **2020**, *11*, 1-9.

- [9] Ye, T. N.; Lu, Li, J.; Nakao, T.; Yang, H.; Tada, T. Copper-based intermetallic electride catalyst for chemoselective hydrogenation reactions. *J. Am. Chem. Soc.* **2017**, *139*, 17089-17097.
- [10] Nakajima, M.; Fava, E.; Loescher, S.; Jiang, Z.; Rueping, M. Photoredox-catalyzed reductive coupling of aldehydes, ketones, and imines with visible light. *Angew. Chem., Int. Ed.* **2015**, *54*, 8828-8832.
- [11] Naumann, R.; Goetz, M. How the sustainable solvent water unleashes the photoredox catalytic potential of ruthenium polypyridyl complexes for pinacol couplings. *Green Chem.* **2019**, *21*, 4470-4474.
- [12] Gualandi, A.; Rodeghiero, G.; Della Rocca, E.; Bertoni, F.; Marchini, M.; Perciaccante, R.; Jansen, T. P.; Ceroni, P.; Cozzi, P. G. Application of coumarin dyes for organic photoredox catalysis. *Chem. Commun.* **2018**, *54*, 10044-10047.
- [13] Okamoto, S.; Kojiyama, K.; Tsujioka, H.; Sudo, A. Metal-free reductive coupling of C=O and C=N bonds driven by visible light: use of perylene as a simple photoredox catalyst. *Chem. Commun.* **2016**, *52*, 11339-11342.

#### 4. Absorption and photoluminescence spectra of CdS QDs

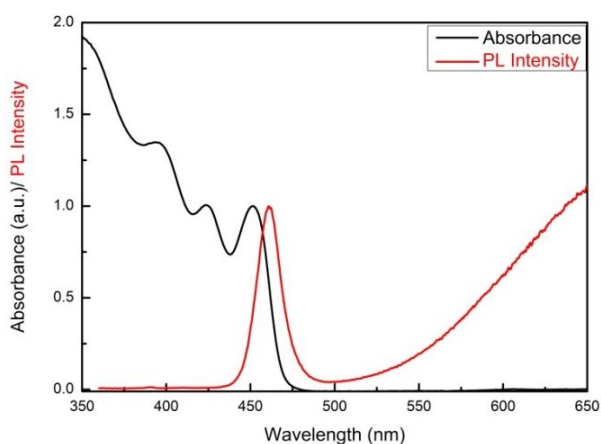

Figure S3 Absorption and photoluminescence spectra of CdS.

#### 5. NMR monitoring

Reactions performed with methyl 4-formylbenzoate (0.1 mmol), QDs with 3 monolayers of CdS ( $2.0 \times 10^{-9}$  mol,  $2 \times 10^{-3}$  mol %), p-toluenethiol (0.15 mmol, 1.5 equiv.) in deuterated toluene (2 mL) illuminated with  $2 \times 3$  W green LED.

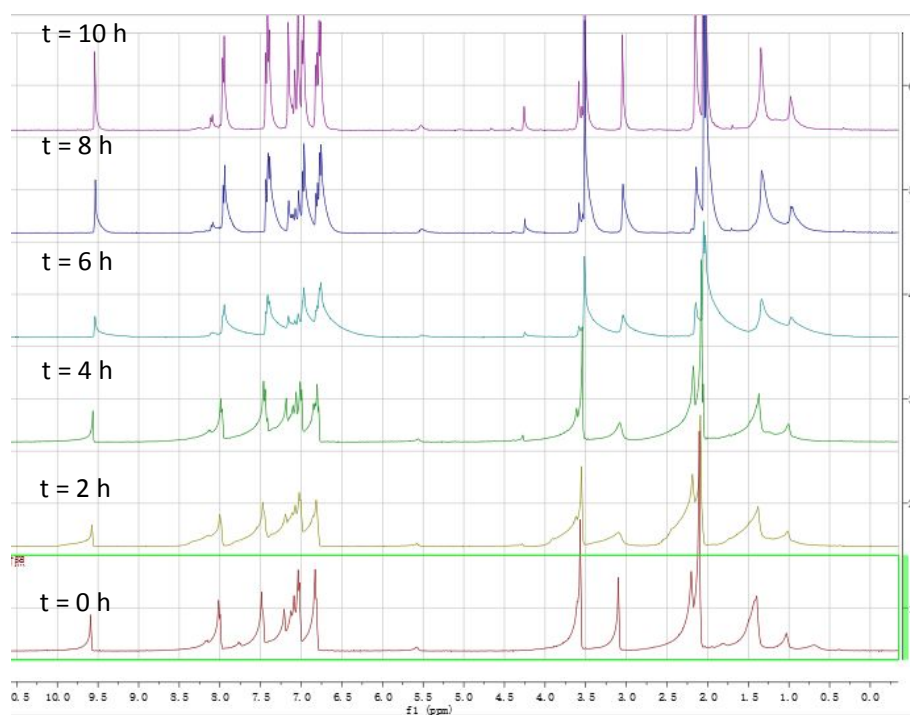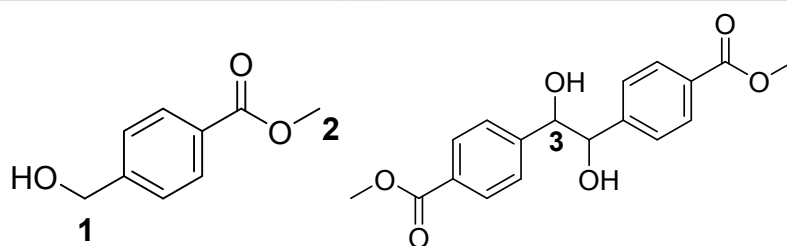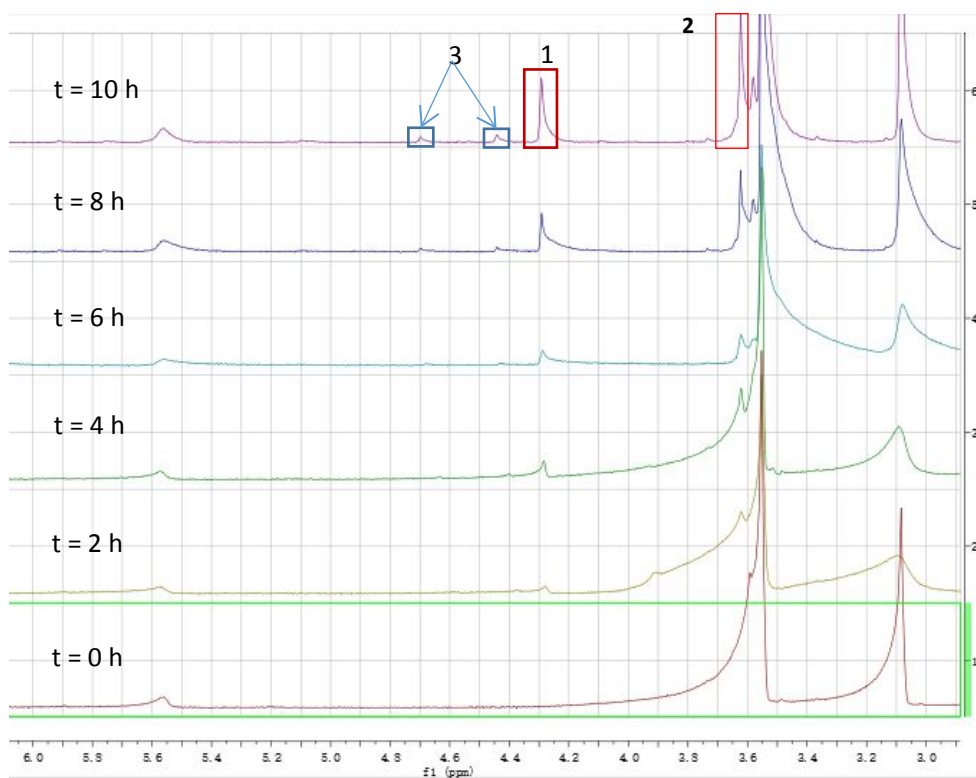

Figure S4  $^1\text{H}$  NMR spectra (400 MHz,  $\text{CDCl}_3$ )

## 6. Recycling of quantum dots

(1) 4,4-Dimethylbenzophenone (0.1 mmol, 21.8 mg), p-toluenethiol (0.15 mmol, 21.4 mg, 1.5eq), CdSe/3CdS ( $2.0 \times 10^{-9}$  mol,  $2 \times 10^{-5}$  mol/L,  $2 \times 10^{-3}$  mol %) in hexane(2 ml), purging with argon gas for 15 minutes before illumination by  $2 \times 3$  W green LED. After 22 hours, the product was removed by centrifugation. The raw material and p-tolylthiophenol were added to the reaction in which the product had been removed, and the reaction was continued after argon gas purge. After 10 cycles, the total yield reached 90 %. The turnover number reached  $4.117 \times 10^5$ .

Table S3 Catalyst recycling reactions

| entry | 4,4'-<br>Dimethylbenz<br>ophenone(mg<br>) | p-<br>Thiocresol(m<br>g) | Time(h) | Yield(mg)         | Yield(%) |
|-------|-------------------------------------------|--------------------------|---------|-------------------|----------|
| 1     | 21.8                                      | 21.4                     | 22      | 17.4              | 79       |
| 2     | 21.7                                      | 21.4                     | 22      | 26.0              | 119      |
| 3     | 22.0                                      | 26.2                     | 22      | 17.9              | 81       |
| 4     | 20.2                                      | 16.7                     | 23      | 19.7              | 89       |
| 5     | 20.5                                      | 24.3                     | 23      | 16.5              | 80       |
| 6     | 19.8                                      | 21.4                     | 23      | 16.9              | 85       |
| 7     | 19.8                                      | 25.0                     | 27      | 13.7              | 69       |
| 8     | 18.0                                      | 11.1                     | 26      | 15.8              | 87       |
| 9     | 18.2                                      | 16.6                     | 28      | 11.8              | 64       |
| 10    | 9.7                                       | 8.5                      | 38      | 18.6 <sup>b</sup> | 191      |
| sum   | 191.7                                     |                          |         | 174.3             | 90 %     |

<sup>a</sup>4,4-Dimethylbenzophenone, p-toluenethiol, QDs with 3 monolayers of CdS ( $2.0 \times 10^{-9}$  mol,  $2 \times 10^{-5}$  mol/L,  $2 \times 10^{-3}$  mol %) in hexane(2 ml), purging with argon gas for 15 minutes before illumination by  $2 \times 3$  W green LED. <sup>b</sup>11.5 mg of it was obtained by silica gel column chromatography.

The solvent lost during the first reaction was not replenished during the second cycle, so that there was very little solvent remaining after the second cycle. After the second cycle, the product remaining in the solvent in the first reaction and the product generated in the second cycle are precipitated together in a very small amount of solvent, which results in a yield of over 100 %. In the following cycle, the solvent is added. Due to the continuous loss of quantum dots during the cycle, the reaction time is prolonged. The continuous accumulation of disulfides affects the precipitation of products from the solution. Finally, we decided to stop the experiment after 10 cycles. In the last cycle, the products accumulated in the reaction solution were separated by column chromatography, resulting in a yield of more than 100 %. Due to the continuous addition of excessive thiophenol during the cycle, the content of thiophenol in the later reaction system is greater than 1.5 equivalents, which leads to an increase in the proportion of alcohol products, so that the final yield is only 90 % but not 99 %.

(2) 4,4-Dimethylbenzophenone (0.1 mmol, 21.8 mg), p-toluenethiol (0.15 mmol, 21.4 mg, 1.5eq), CdSe/3CdS ( $2.0 \times 10^{-9}$  mol,  $2 \times 10^{-5}$  mol/L,  $2 \times 10^{-3}$  mol %) in hexane (2 ml), purging with argon gas for 15 minutes before illumination by  $2 \times 3$  W green LED. After 22 hours, the product

was removed by centrifugation. The methanol (2 mL) was added to recover the QDs, the rest of the product was recovered by silica gel column chromatography and then the QDs reused for three times. The first run yield is 83%, the second run yield is 96%, the third run yield is 55%, and the total yield is 78%.

## 7. TEM images of CdSe/3CdS before and after the reaction

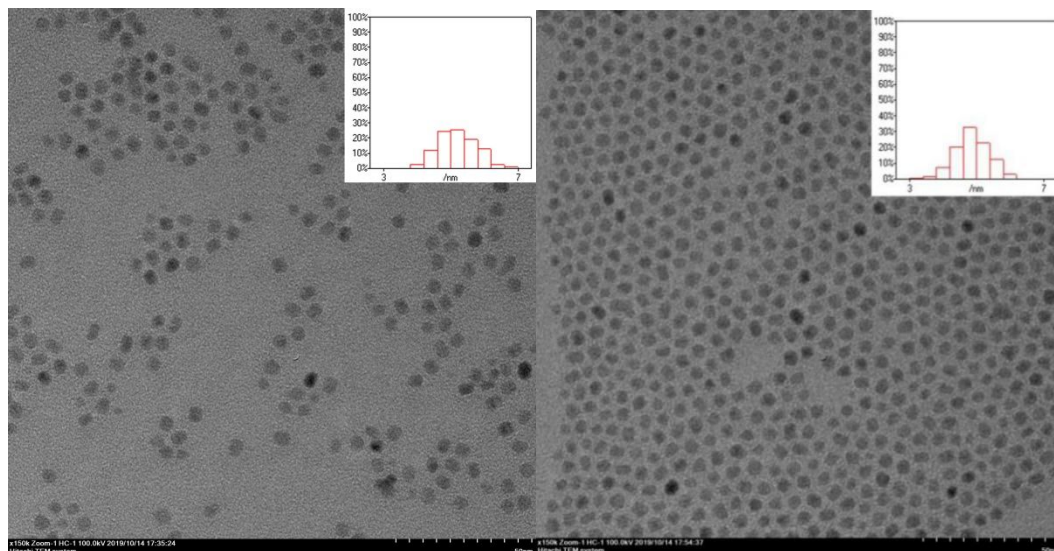

Figure S5 TEM images of CdSe/3CdS before (a) and after (b) the reaction.

## 8. UV image of CdSe/3CdS before and after the reaction

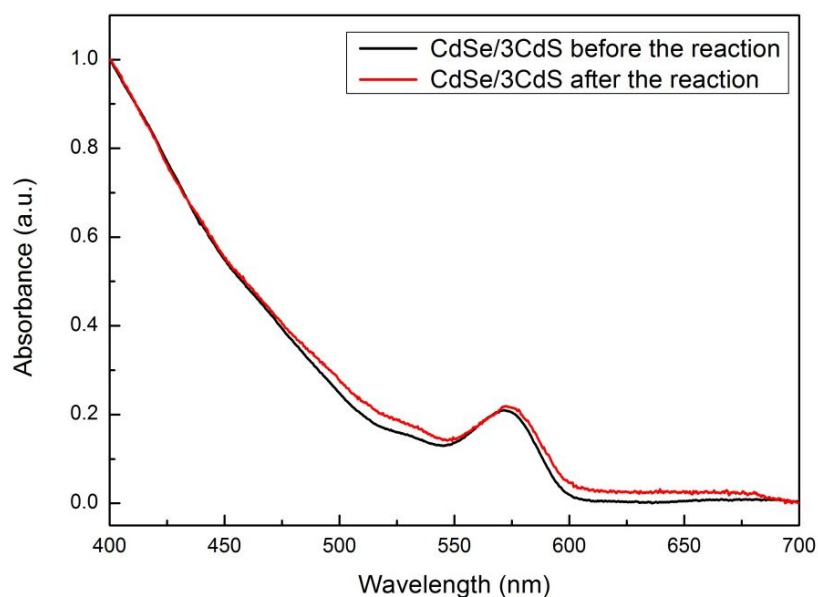

Figure S6 UV image of CdSe/3CdS before and after the reaction.

## 9. XPS image of CdSe/3CdS before and after the reaction

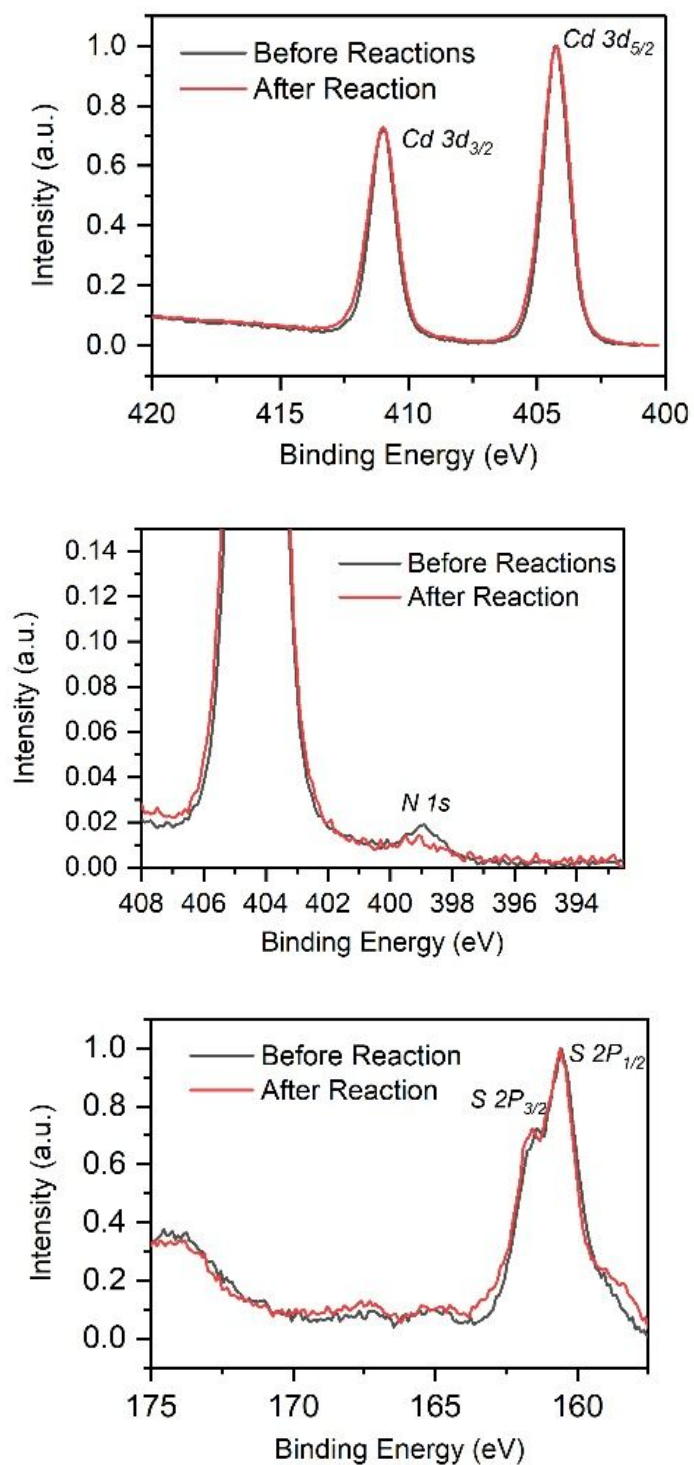

Figure S7 XPS image of CdSe/3CdS before and after the reaction.

## 10. Photoreaction setup for scale-up reaction

### (1) Aldehyde reduction



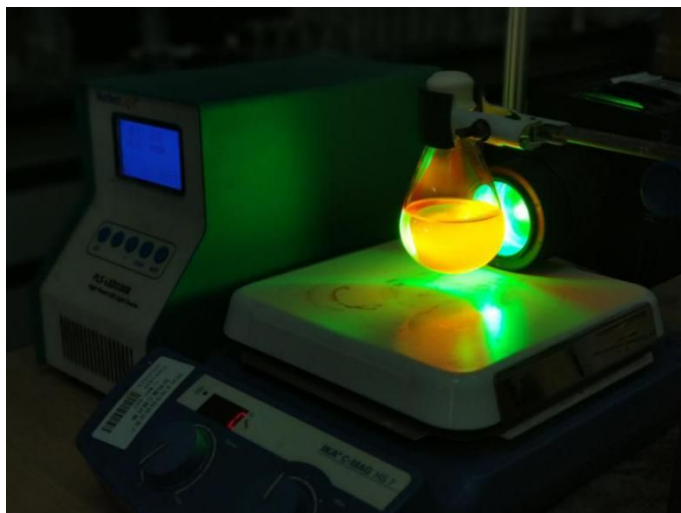

Figure S8

## (2) Reductive coupling reaction

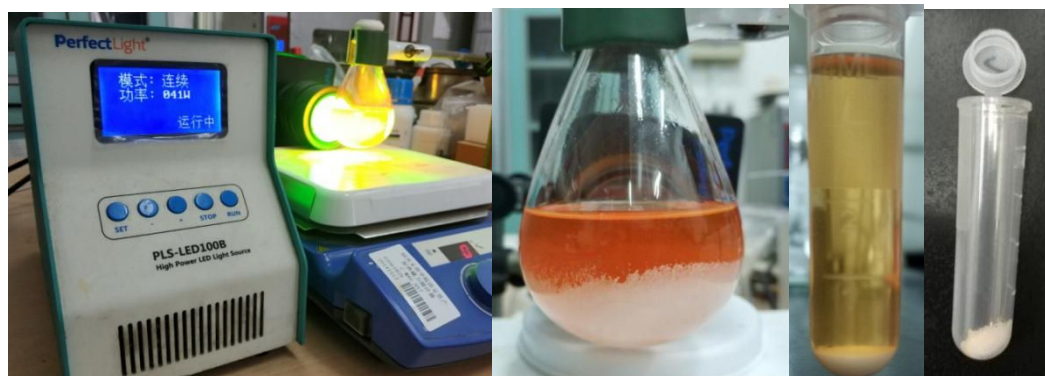

Figure S9

## 11. Photoredox transfer hydrogenation under solar irradiation

This experiment was carried out on a clear day (Nov. 1-2, 2019) on a balcony at Zhejiang Sci-tech University (30°27' north latitude and 120°20' east longitude, 10 meters above the sea level). It took 11.5 hours to reach a completion to give the product **3I** in 87% yield.

## 12. Fluorescence quenching Studies

Fluorescence quenching experiments were performed on an Edinburgh instruments FLS920 spectrofluorometer with an excitation wavelength of 450 nm.

A solution of purified CdSe/3CdS core/shell QDs (120  $\mu\text{L}$ ) was added to an appropriate amount of substrates and toluene. The total volume of each solution was 2 mL, the final concentration of QDs in each solution was  $1.2 \times 10^{-6}$  M. All the photoluminescence spectra are collected 10 minutes after the mixing. When testing the quenching effect of thiophenol in the exist of cesium acetate, the concentration of cesium acetate is fixed to  $5 \times 10^{-3}$  M, which can barely quench the QDs. Therefore, the PL quenching is almost own to the products of thiophenol and cesium acetate.

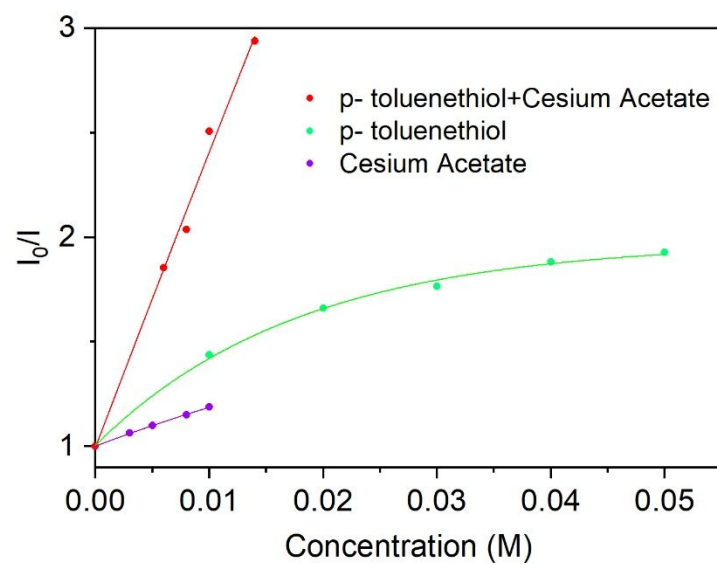

Figure S10 Fluorescence quenching data

### 13. The radical trapping experiments

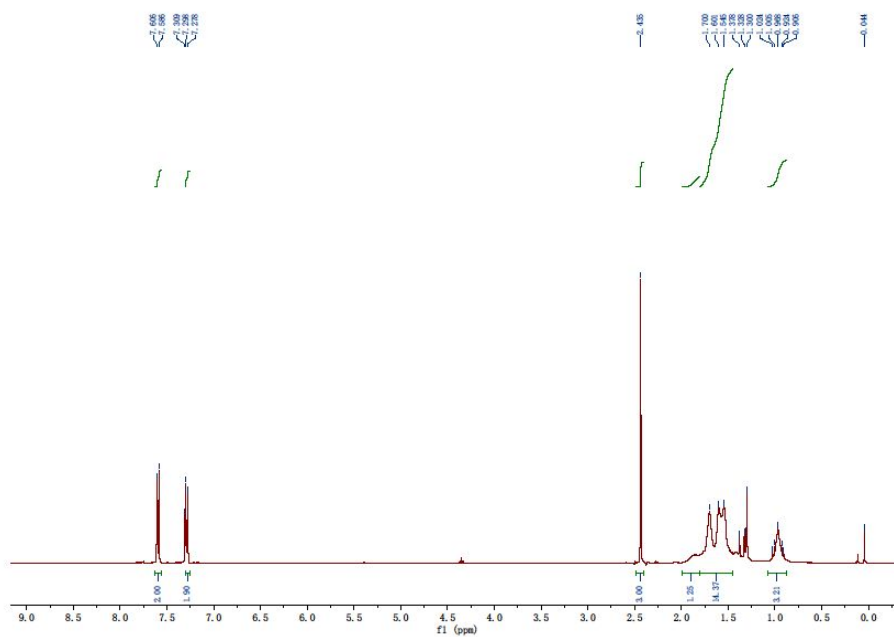

Figure S11  $^1\text{H}$ NMR of the radical trapping product (400 MHz,  $\text{CDCl}_3$ )

#### 14. Micro-injector setup

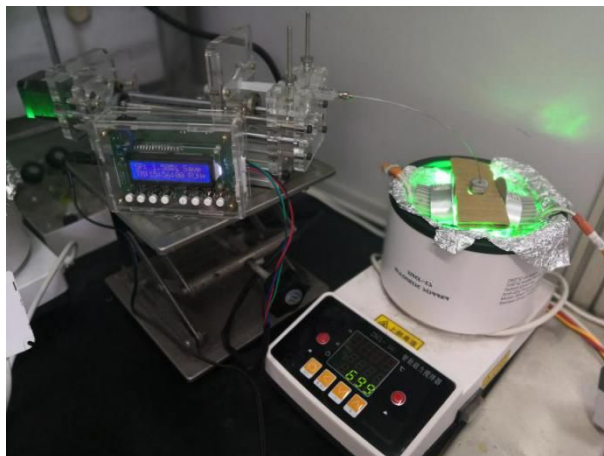

Figure S12

Methyl 4-formylbenzoate **1n** (0.1 mmol, 16.4 mg), p-toluenethiol (0.03 mmol, 4.3 mg, 0.3 eq), CdSe/3CdS ( $2.0 \times 10^{-9}$  mol,  $2 \times 10^{-5}$  mol/L,  $2 \times 10^{-3}$  mol %) in hexane (1.6 ml), purging with argon gas for 15 minutes before illumination by 2×3 W green LED, then a solution of p-toluenethiol (0.12 mmol, 17.1 mg, 1.2eq) and 0.4 mL hexane was added using an injection pump within 15 hours.

#### 15. X-ray crystallographic of **7b**

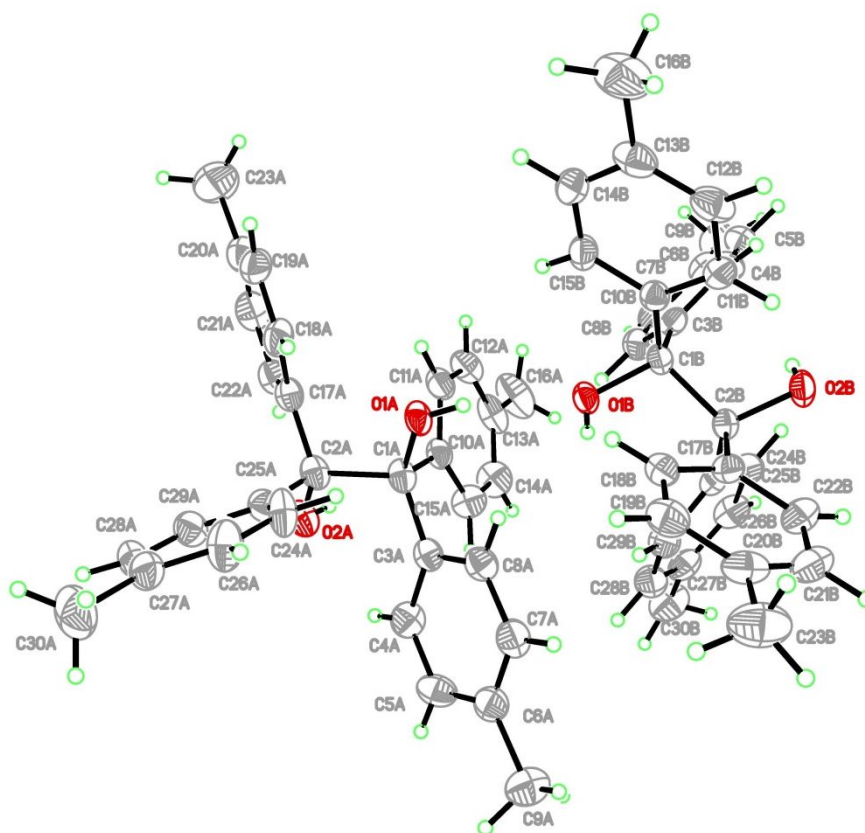

ORTEP drawing of product **7b** in thermal ellipsoidal representation at 30% probability level.

## 16. $^1\text{H}$ NMR and $^{13}\text{C}$ NMR

FAIR Data is available as Supporting Information for Publication and includes the primary NMR FID files for all these synthesized compounds.

$^1\text{H}$  NMR spectra of **3a** (400 MHz,  $\text{CDCl}_3$ ):

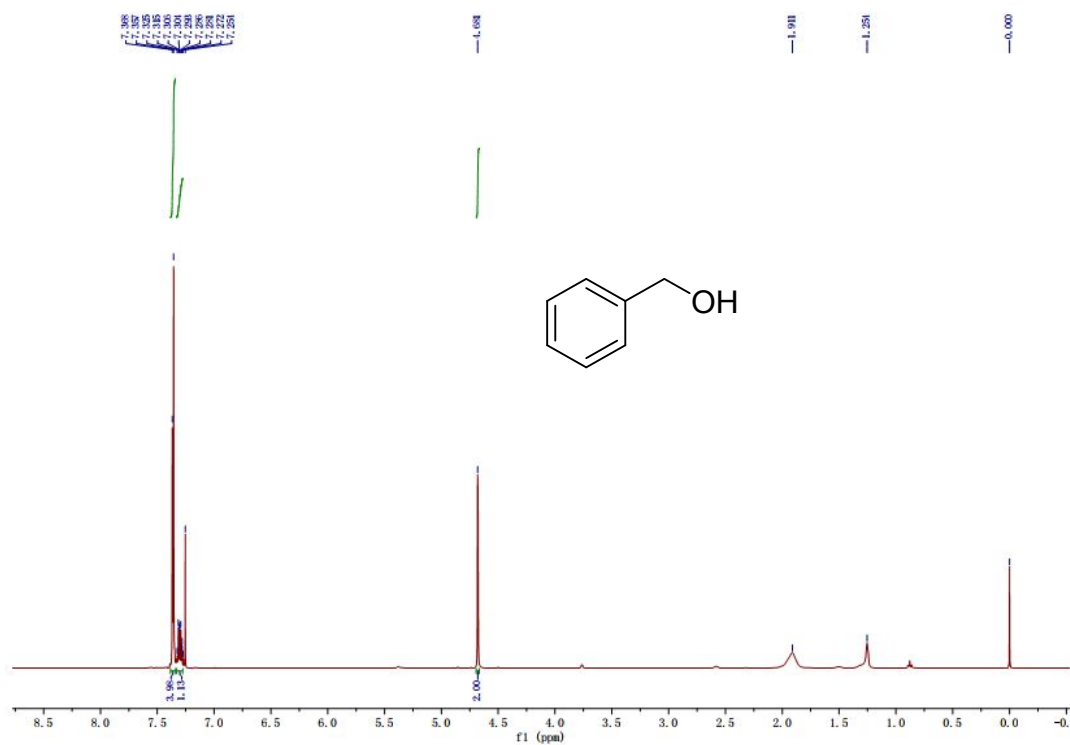

$^{13}\text{C}\{^1\text{H}\}$  NMR spectra of **3a** (100 MHz,  $\text{CDCl}_3$ ):

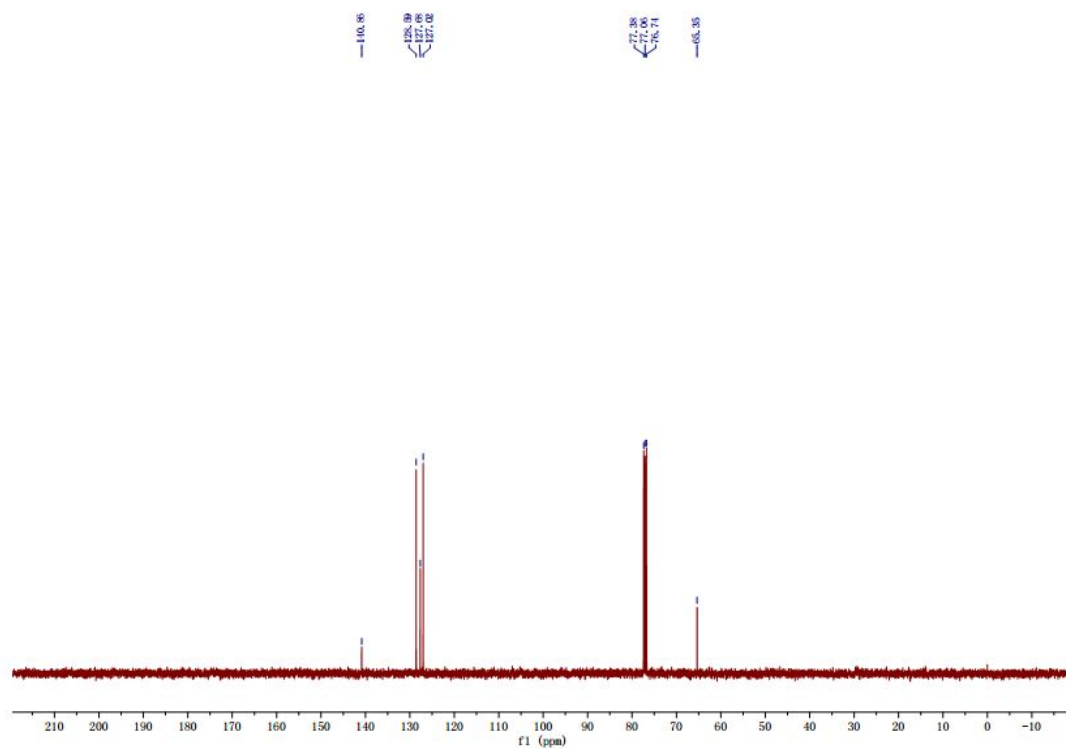

$^1\text{H}$  NMR spectra of **3b** (400 MHz,  $\text{CDCl}_3$ ):

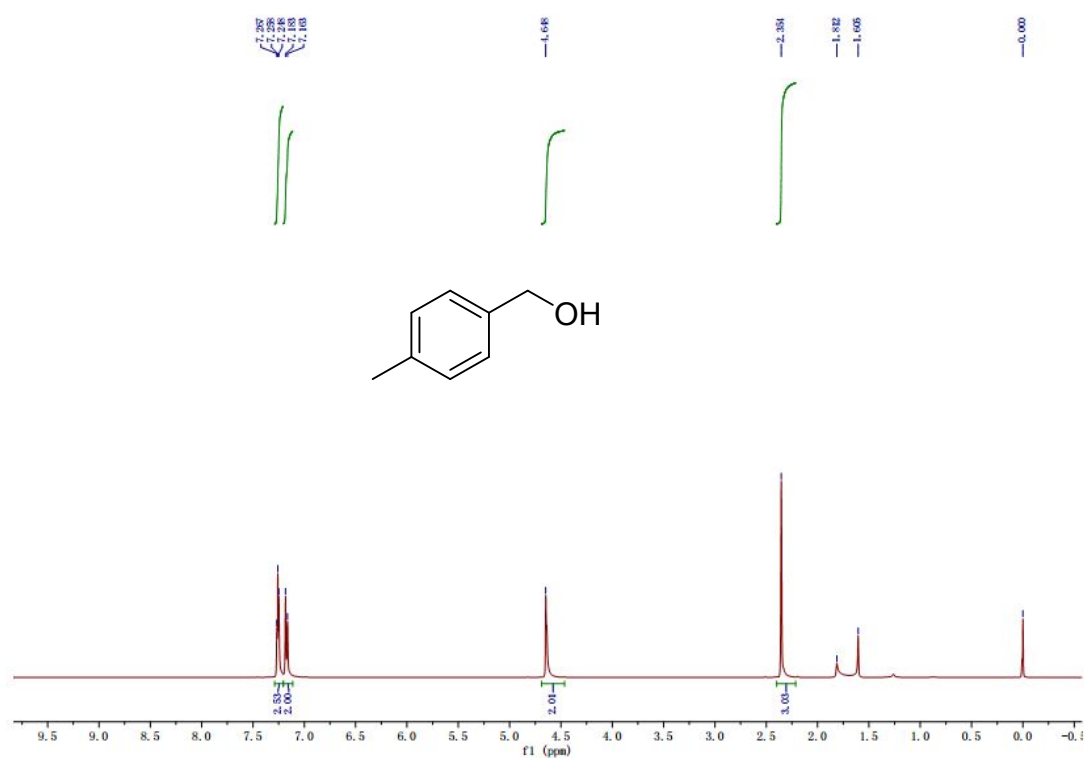

$^{13}\text{C}\{^1\text{H}\}$  NMR spectra of **3b** (100 MHz,  $\text{CDCl}_3$ ):

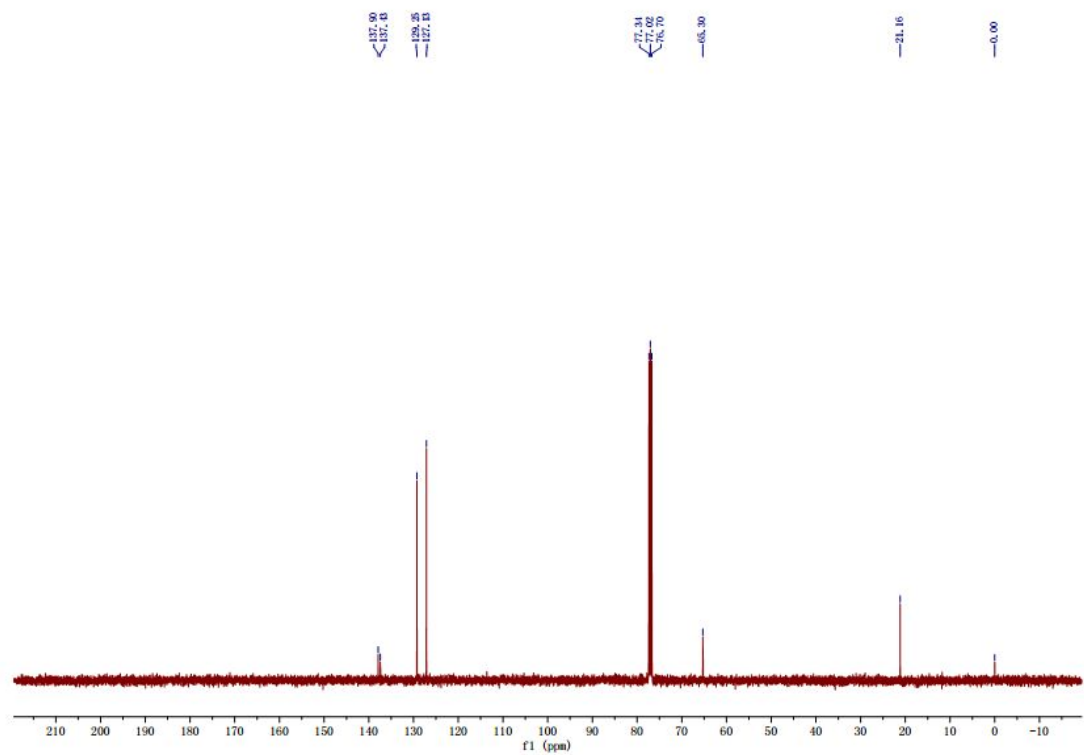

$^1\text{H}$  NMR spectra of **3c** (400 MHz,  $\text{CDCl}_3$ ):

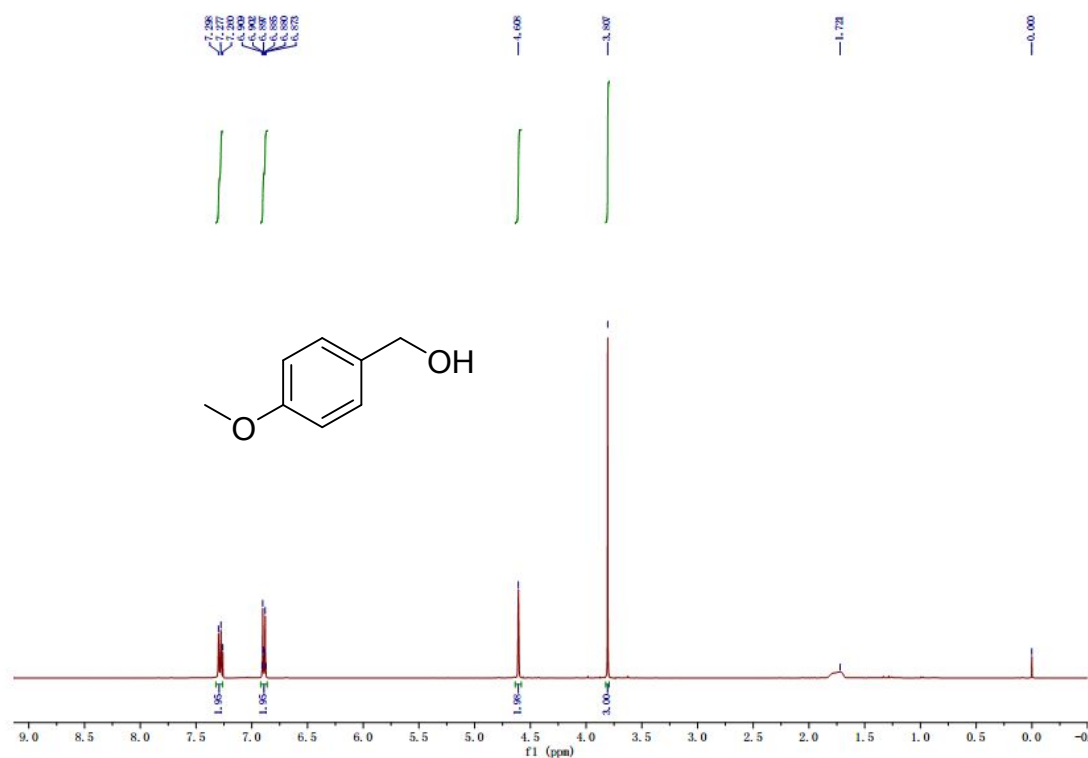

$^{13}\text{C}\{^1\text{H}\}$  NMR spectra of **3c** (100 MHz,  $\text{CDCl}_3$ ):

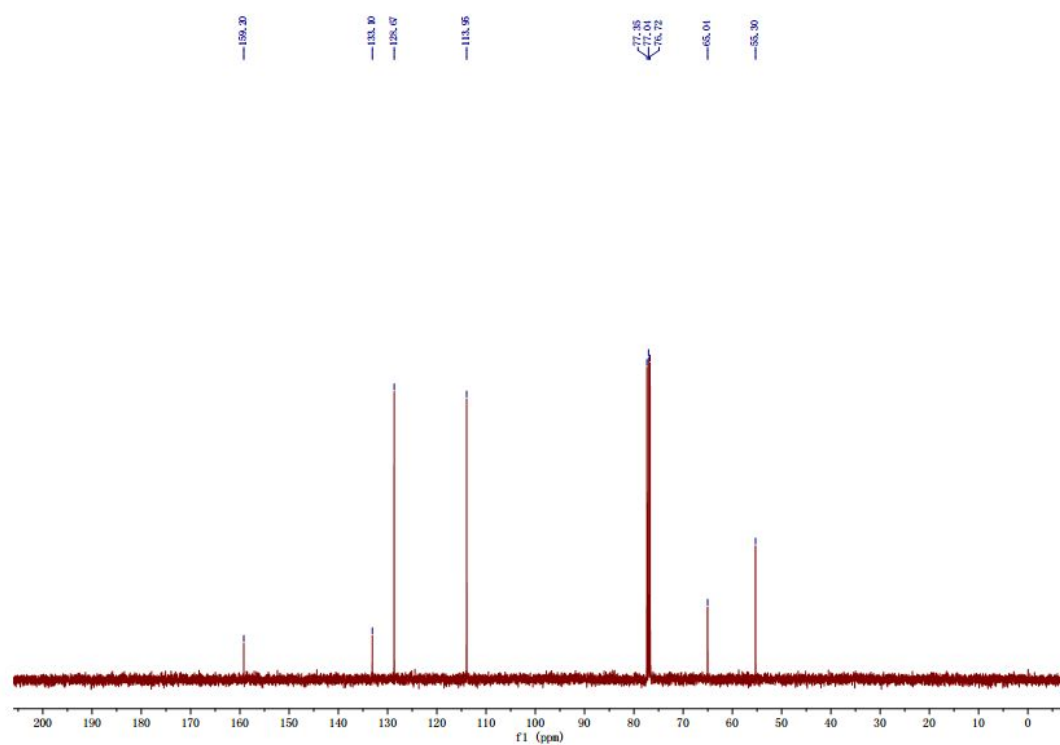

$^1\text{H}$  NMR spectra of **3d** (400 MHz,  $\text{CDCl}_3$ ):

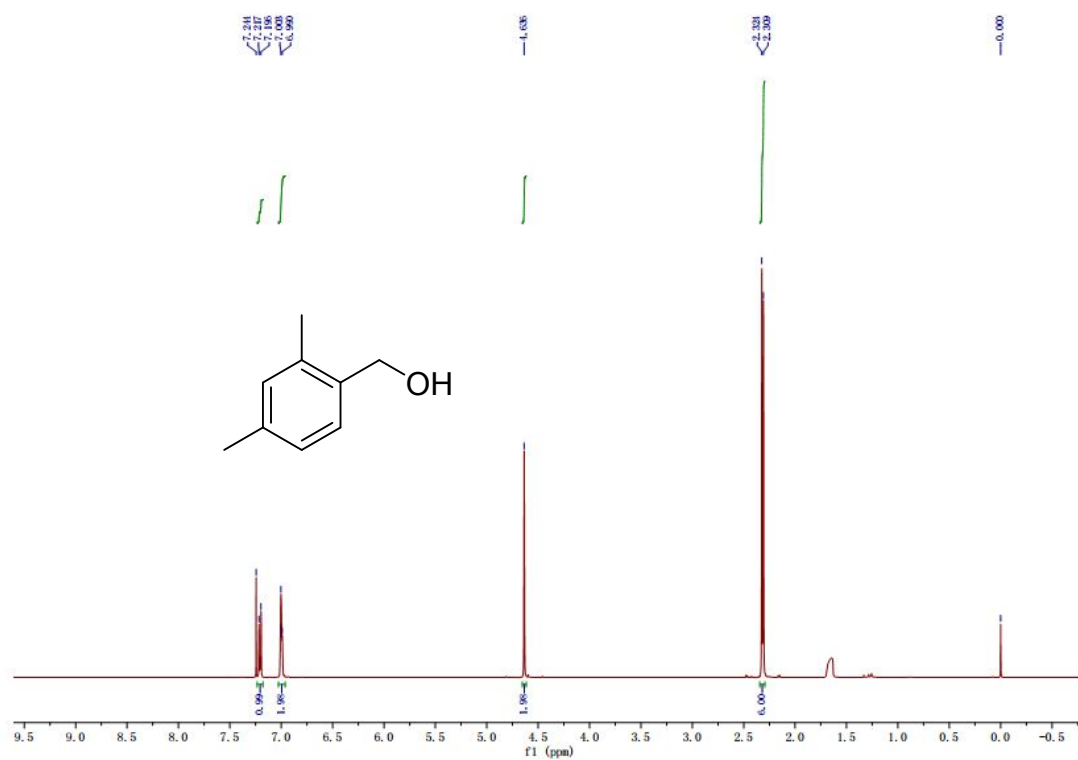

$^{13}\text{C}\{^1\text{H}\}$  NMR spectra of **3d** (100 MHz,  $\text{CDCl}_3$ ):

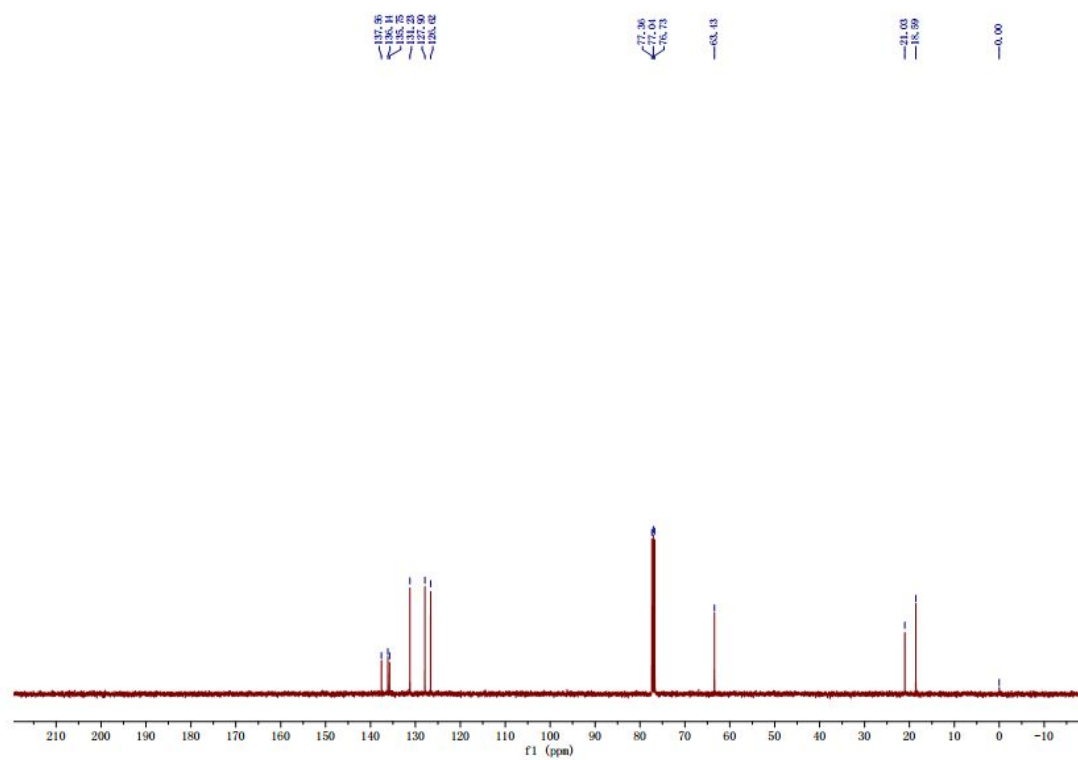

$^1\text{H}$  NMR spectra of **3e** (400 MHz,  $\text{CDCl}_3$ ):

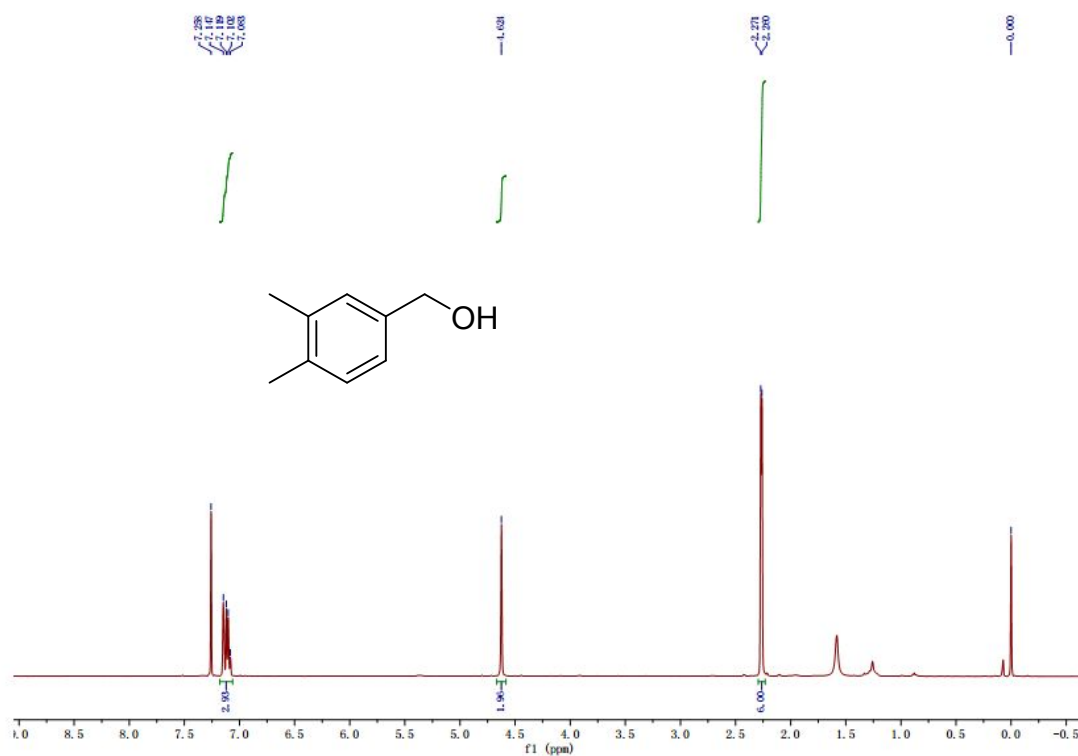

$^{13}\text{C}\{^1\text{H}\}$  NMR spectra of **3e** (100 MHz,  $\text{CDCl}_3$ ):

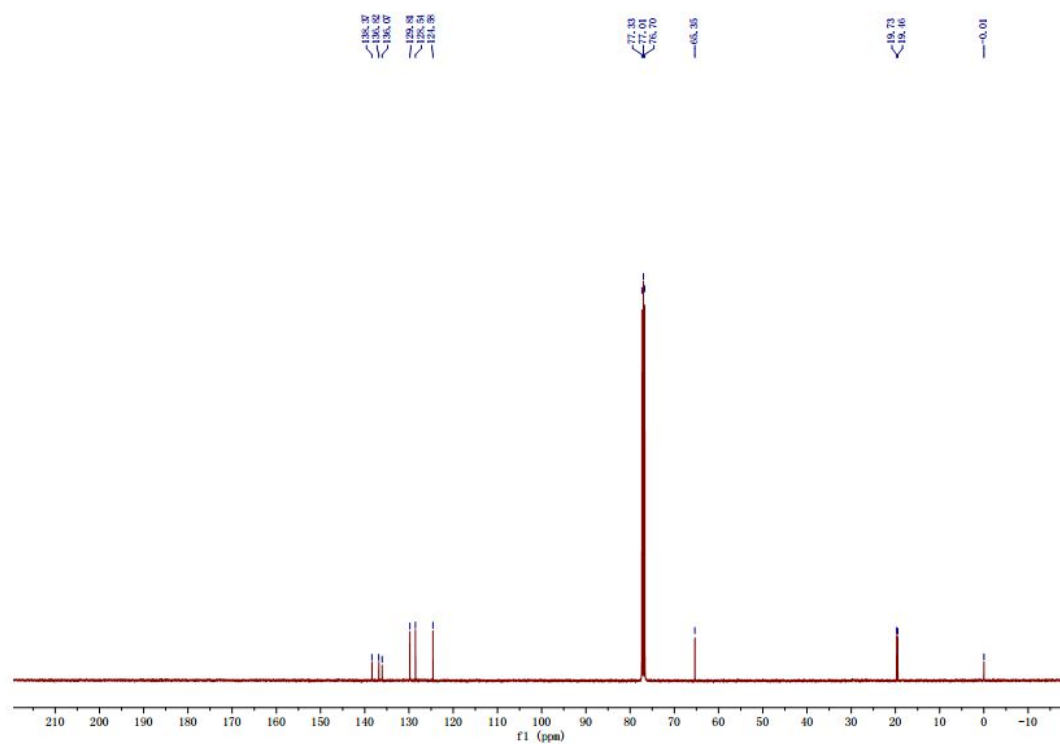



$^1\text{H}$  NMR spectra of **3f** (400 MHz,  $\text{CDCl}_3$ ):

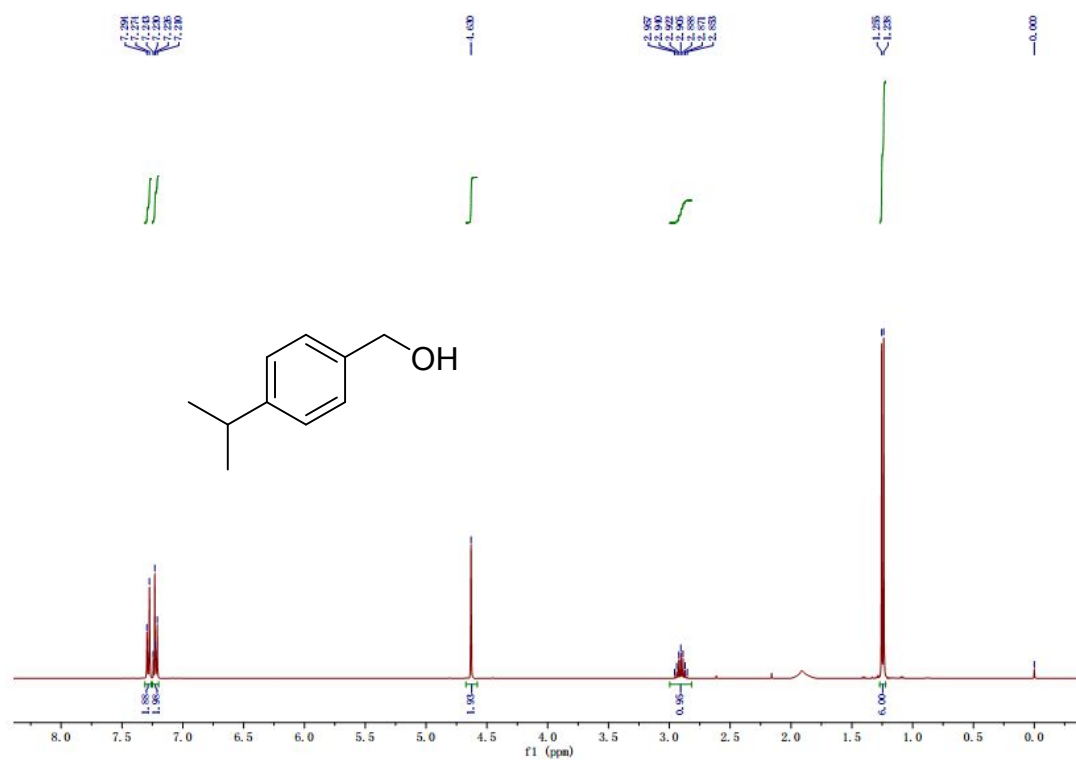

$^{13}\text{C}\{^1\text{H}\}$  NMR spectra of **3f** (100 MHz,  $\text{CDCl}_3$ ):

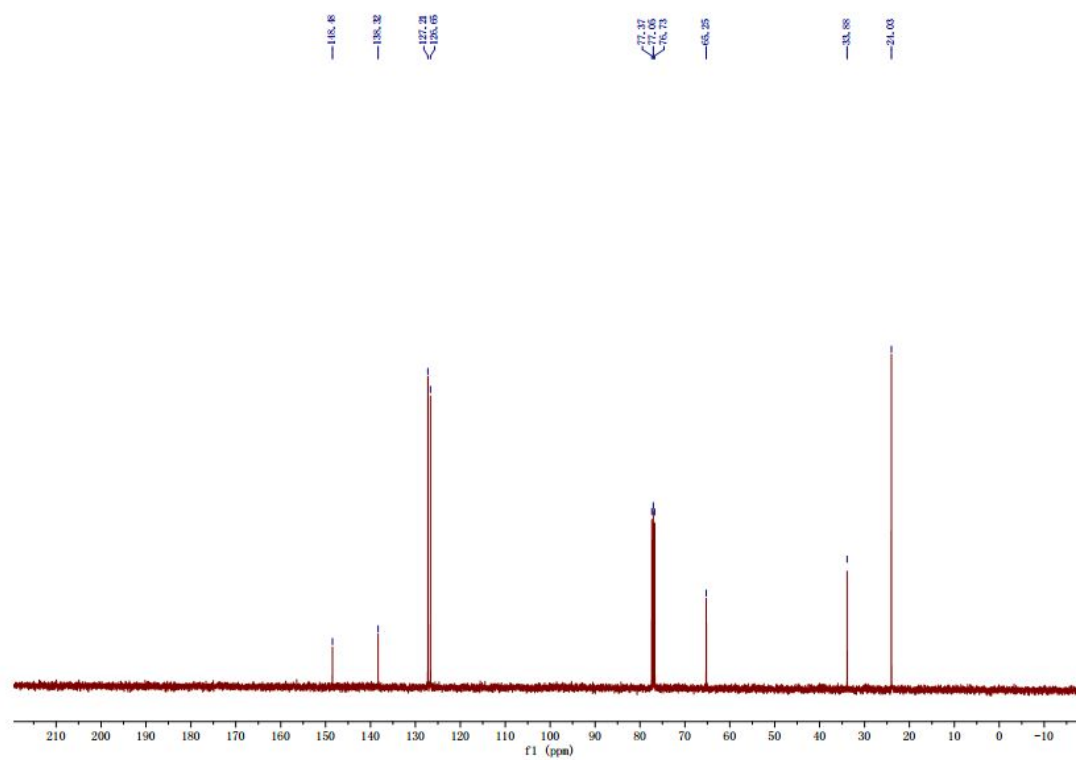

$^1\text{H}$  NMR spectra of **3g** (400 MHz,  $\text{CDCl}_3$ ):

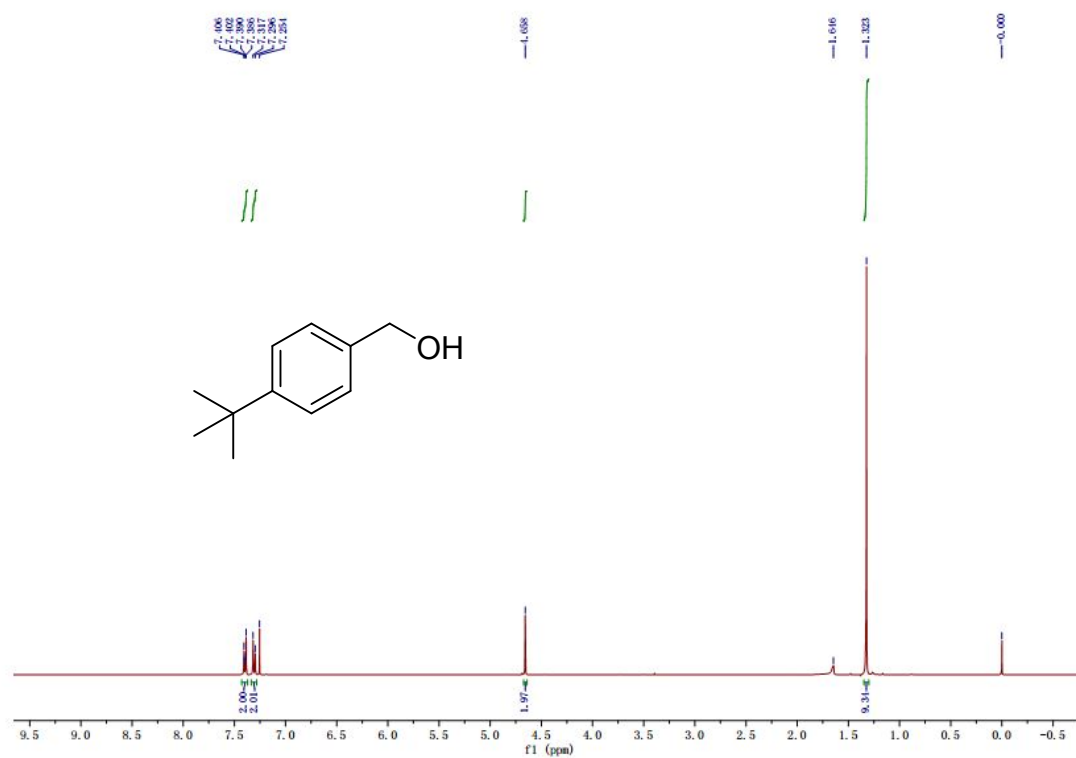

$^{13}\text{C}\{^1\text{H}\}$  NMR spectra of **3g** (100 MHz,  $\text{CDCl}_3$ ):

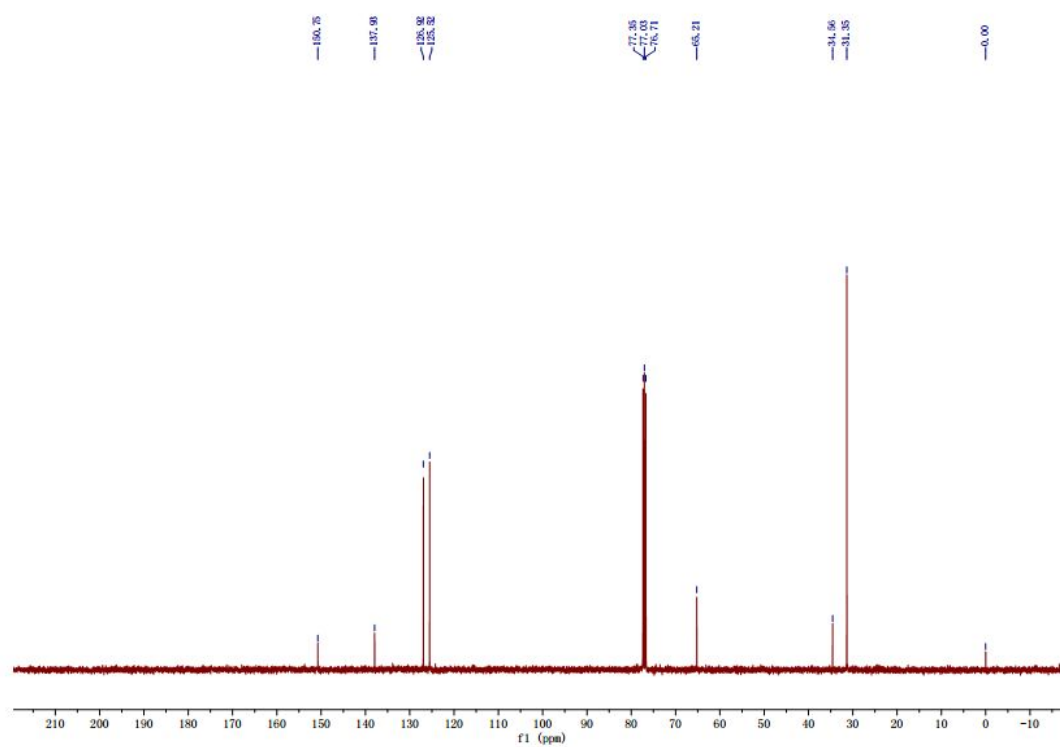

$^1\text{H}$  NMR spectra of **3h** (400 MHz,  $\text{CDCl}_3$ ):

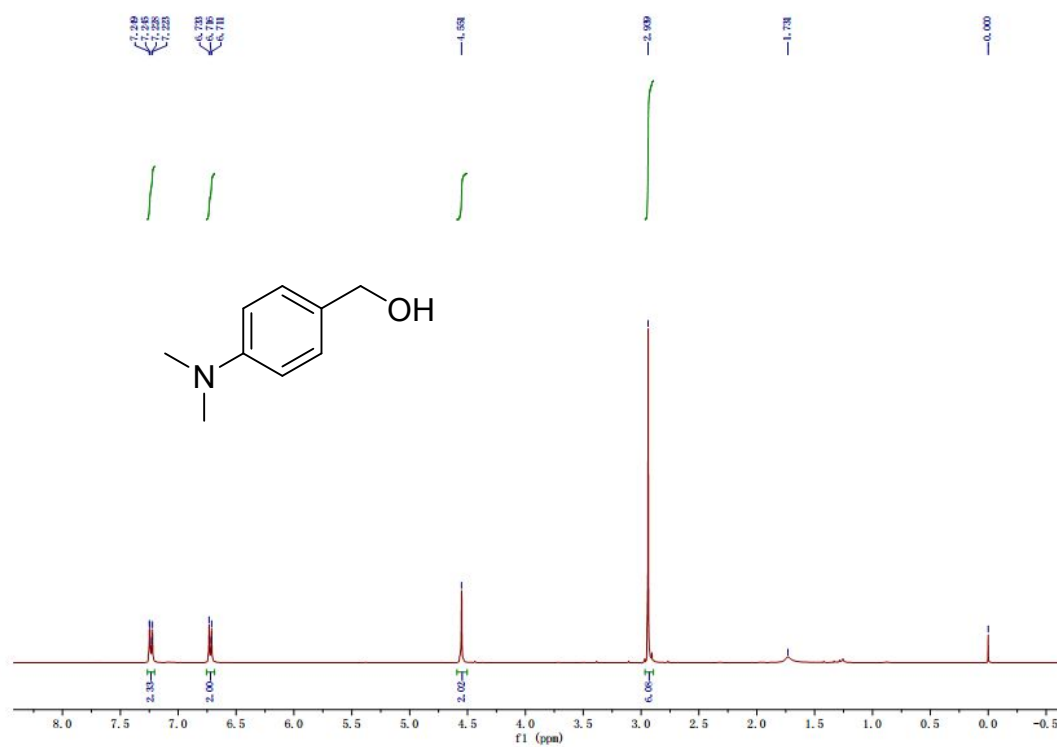

$^{13}\text{C}\{^1\text{H}\}$  NMR spectra of **3h** (100 MHz,  $\text{CDCl}_3$ ):

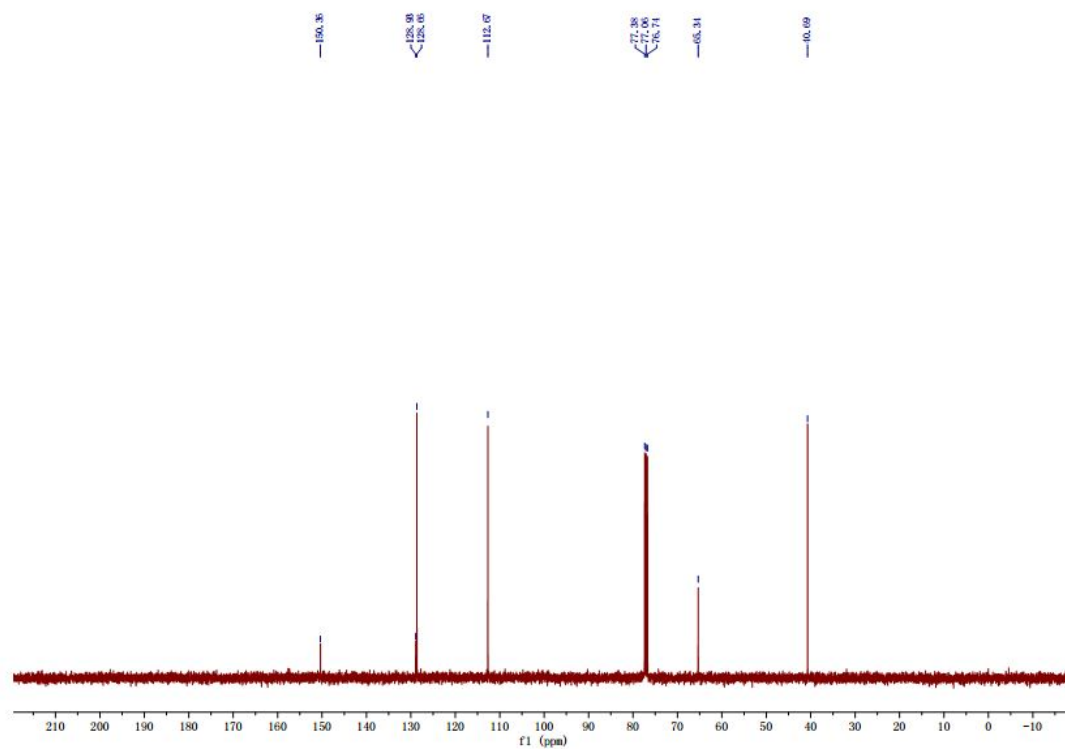

$^1\text{H}$  NMR spectra of **3i** (400 MHz,  $\text{CDCl}_3$ ):

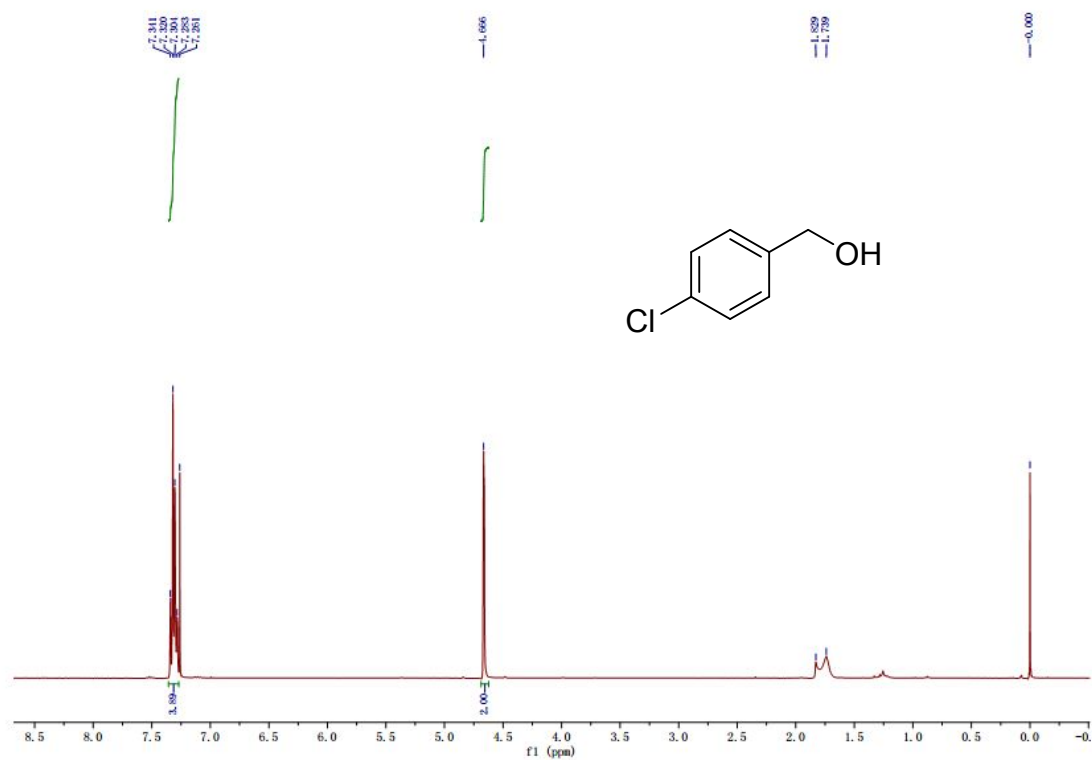

$^{13}\text{C}\{^1\text{H}\}$  NMR spectra of **3i** (100 MHz,  $\text{CDCl}_3$ ):

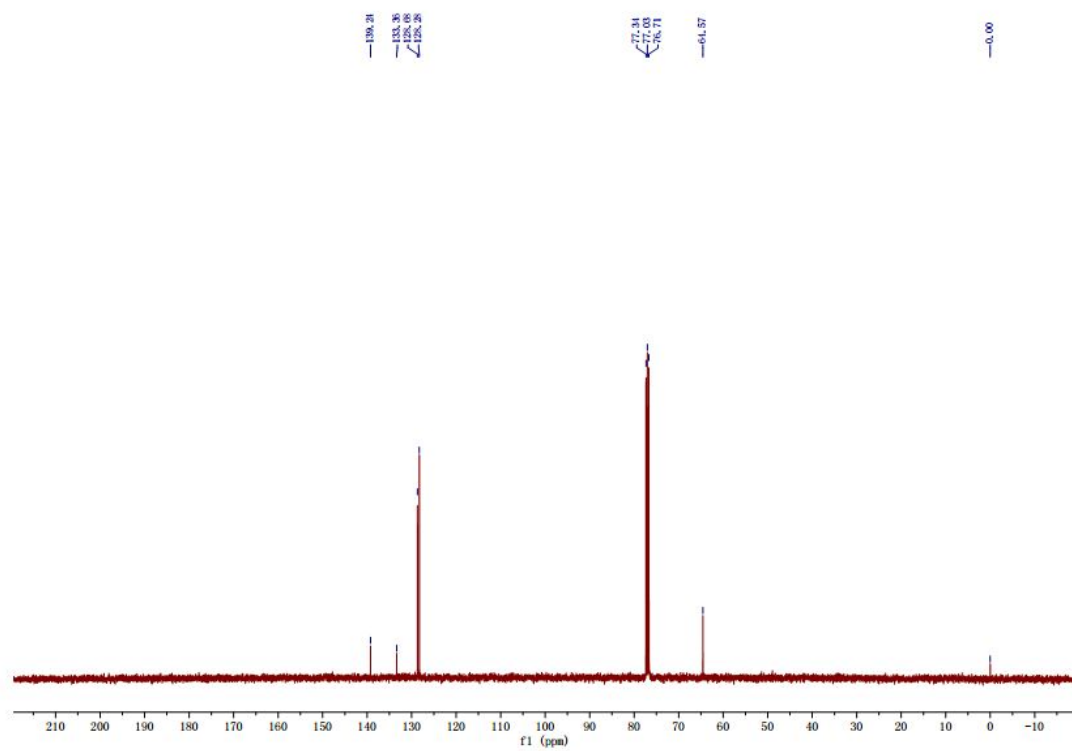

<sup>1</sup>H NMR spectra of **3j** (400 MHz, CDCl<sub>3</sub>):

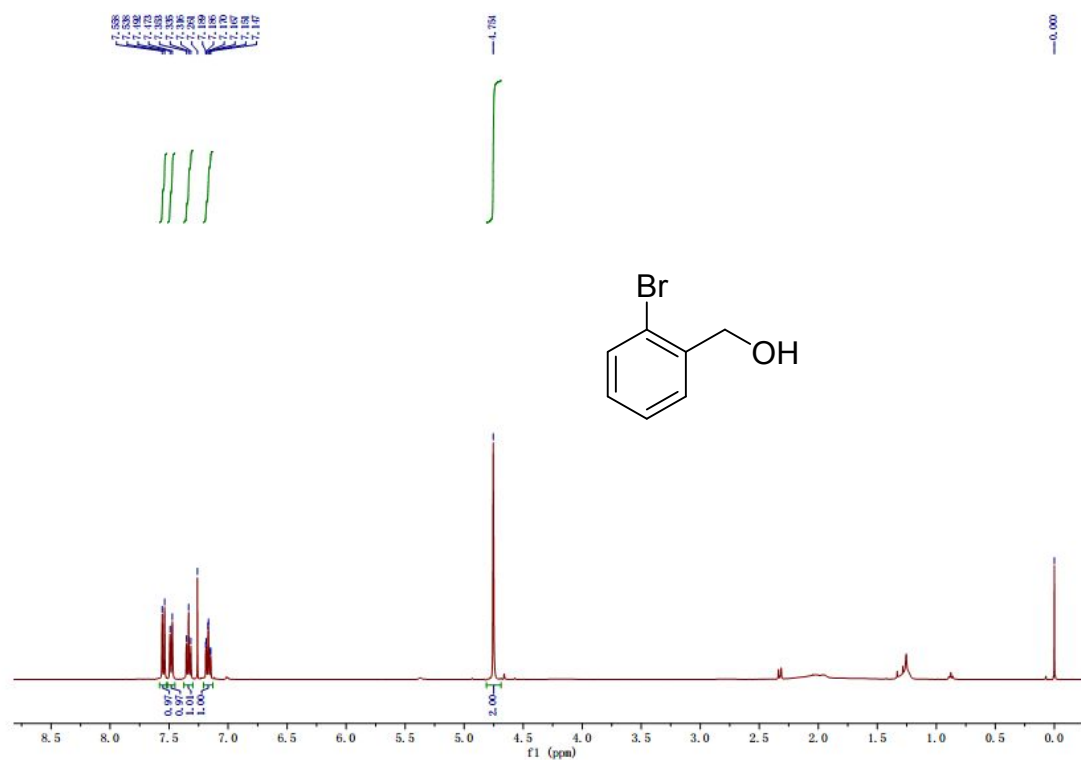

$^{13}\text{C}\{^1\text{H}\}$  NMR spectra of **3j** (100 MHz,  $\text{CDCl}_3$ ):

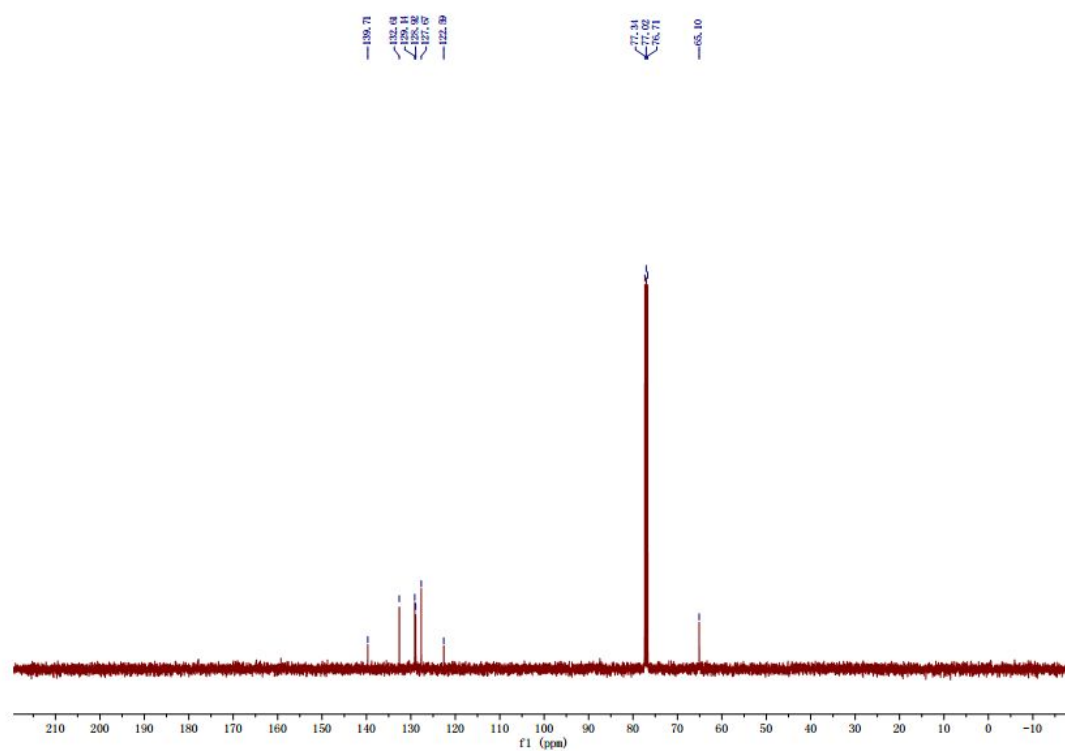

<sup>1</sup>H NMR spectra of **3k** (400 MHz, CDCl<sub>3</sub>):

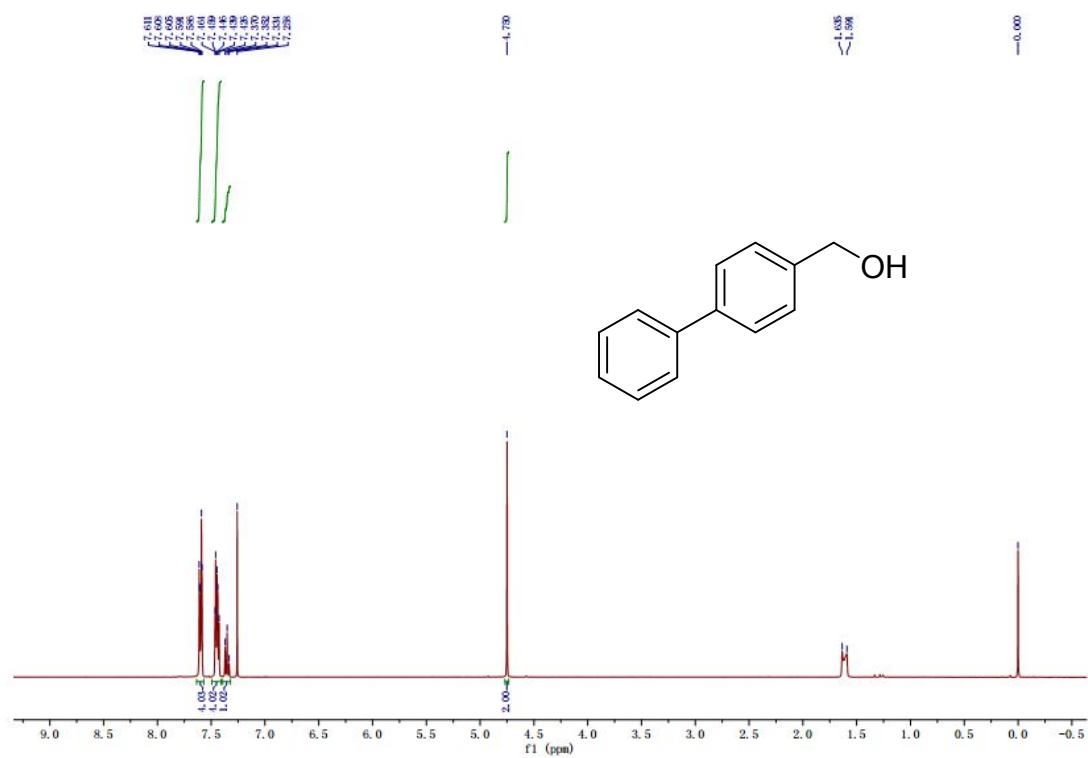

$^{13}\text{C}\{^1\text{H}\}$  NMR spectra of **3k** (100 MHz,  $\text{CDCl}_3$ ):

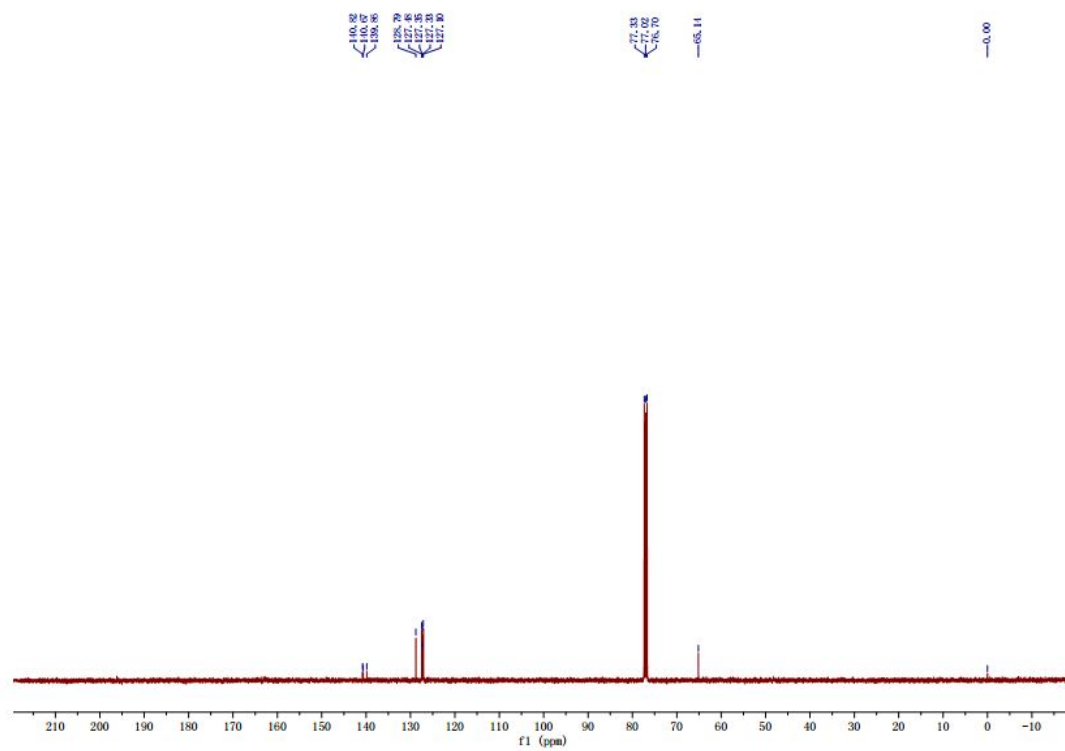

$^1\text{H}$  NMR spectra of **3I** (400 MHz,  $\text{CDCl}_3$ ):

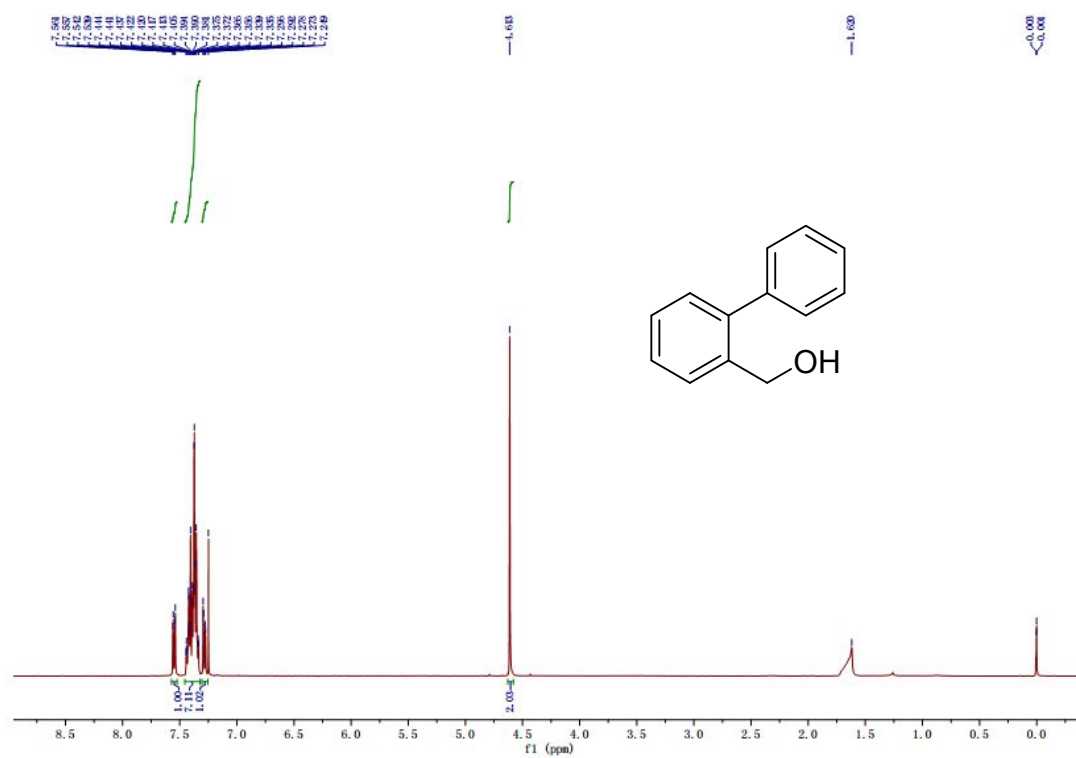

$^{13}\text{C}\{^1\text{H}\}$  NMR spectra of **3I** (100 MHz,  $\text{CDCl}_3$ ):

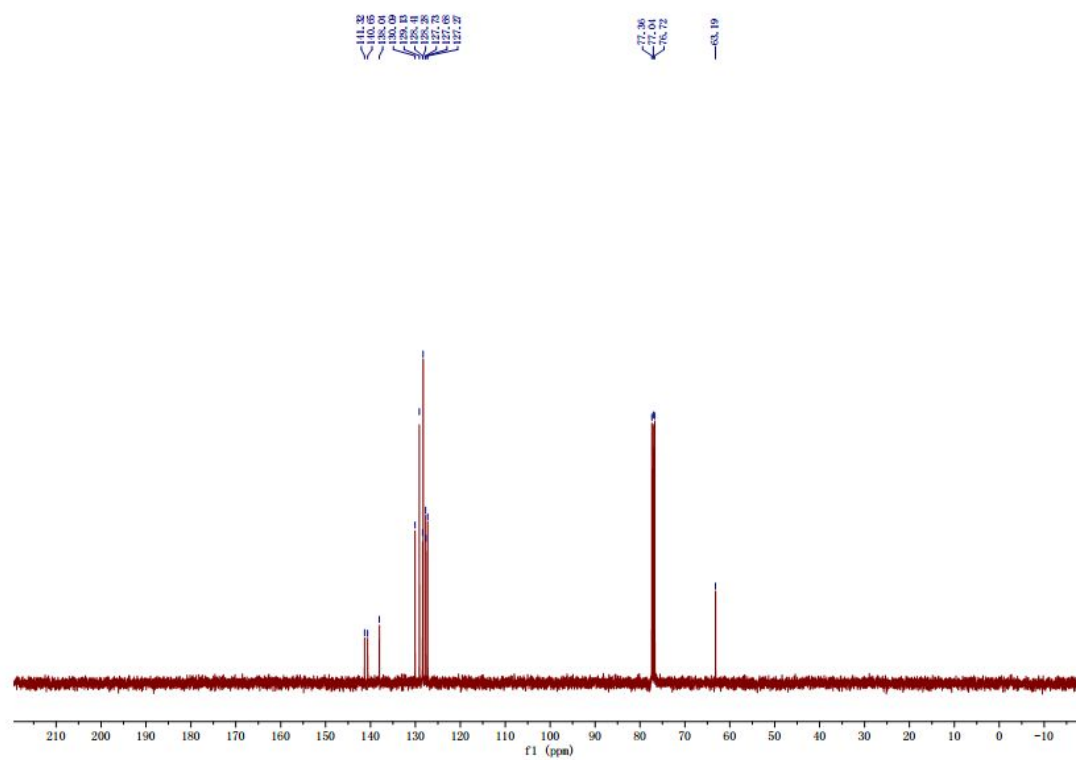

$^1\text{H}$  NMR spectra of **3m** (400 MHz,  $\text{CDCl}_3$ ):

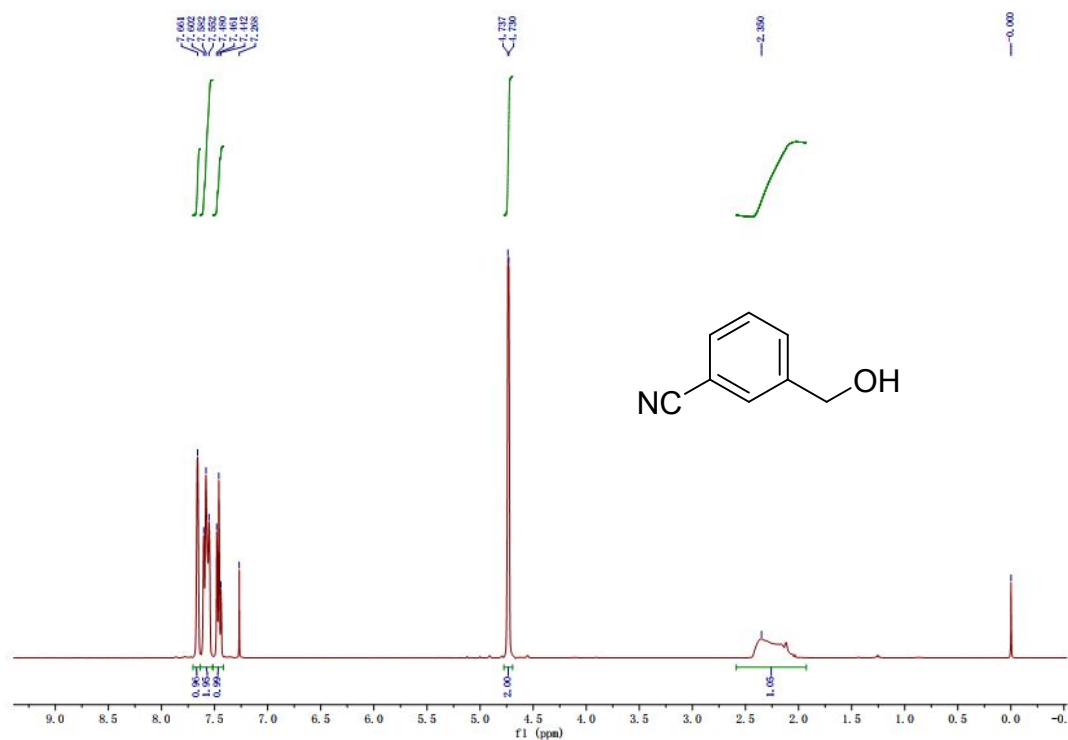

$^{13}\text{C}\{^1\text{H}\}$  NMR spectra of **3m** (100 MHz,  $\text{CDCl}_3$ ):

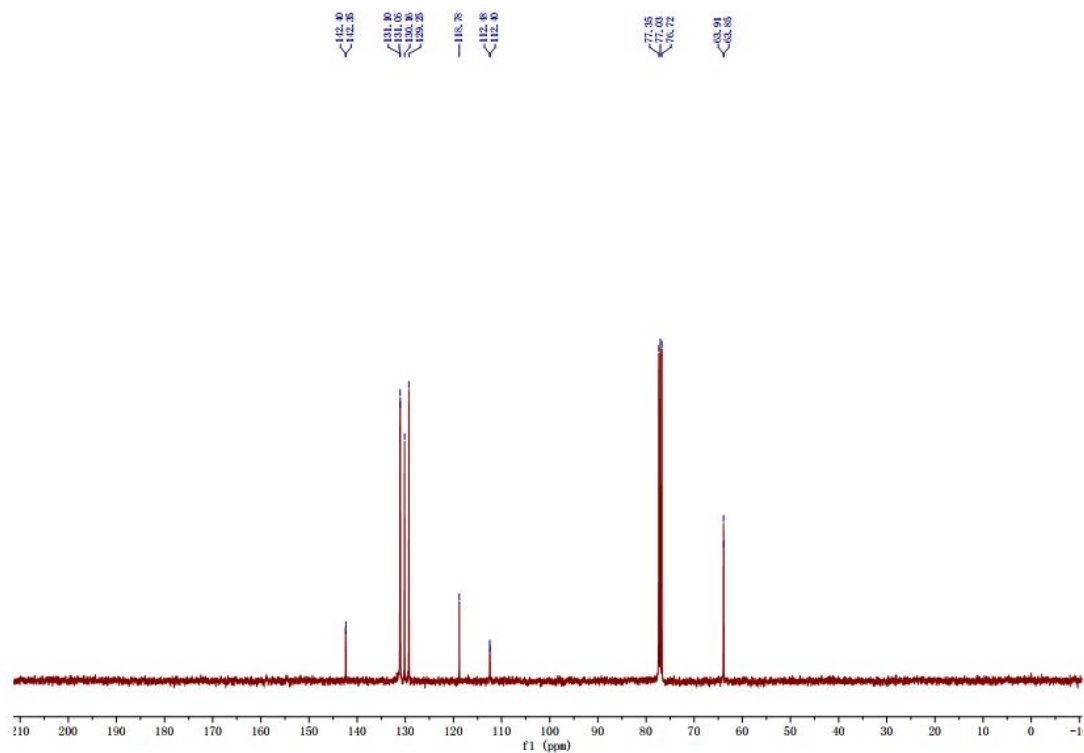



$^1\text{H}$  NMR spectra of **3n** (400 MHz,  $\text{CDCl}_3$ ):

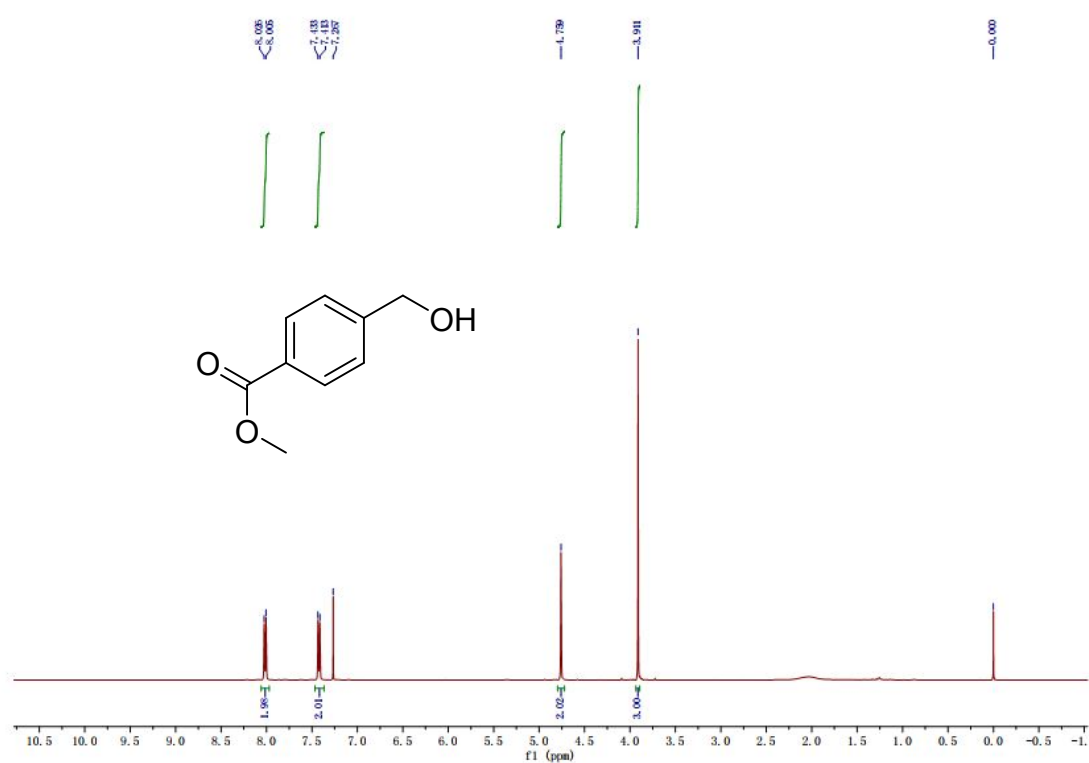

$^{13}\text{C}\{^1\text{H}\}$  NMR spectra of **3n** (100 MHz,  $\text{CDCl}_3$ ):

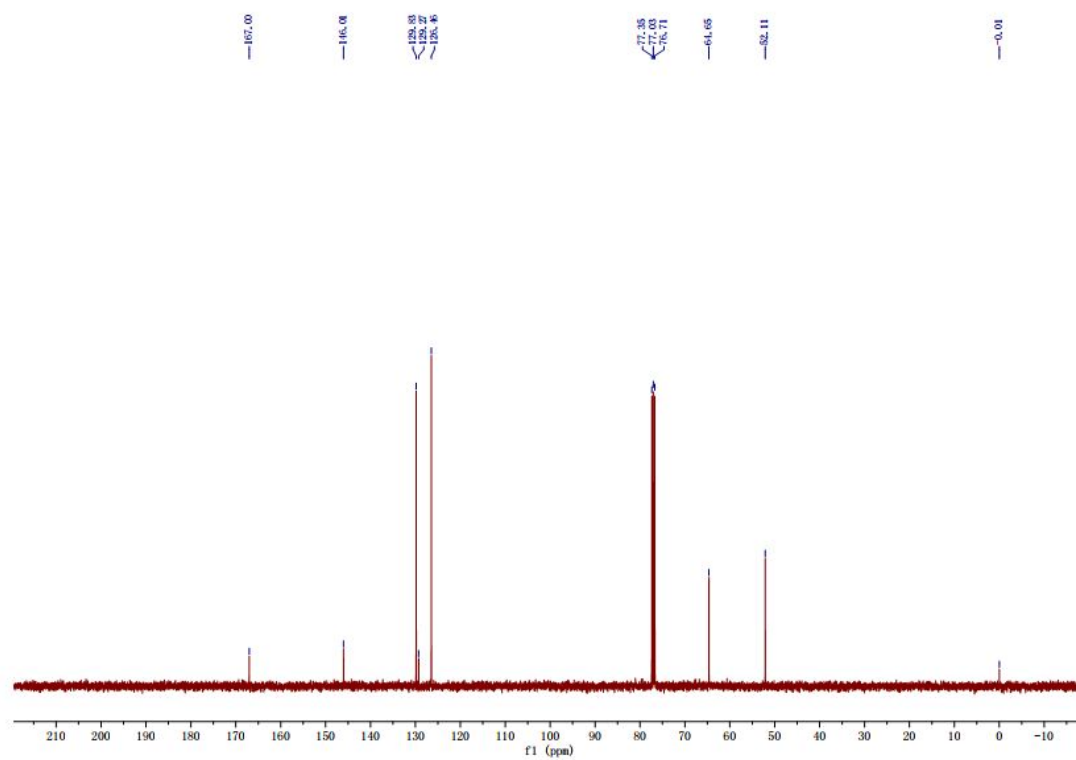

$^1\text{H}$  NMR spectra of **3o** (400 MHz,  $\text{CDCl}_3$ ):

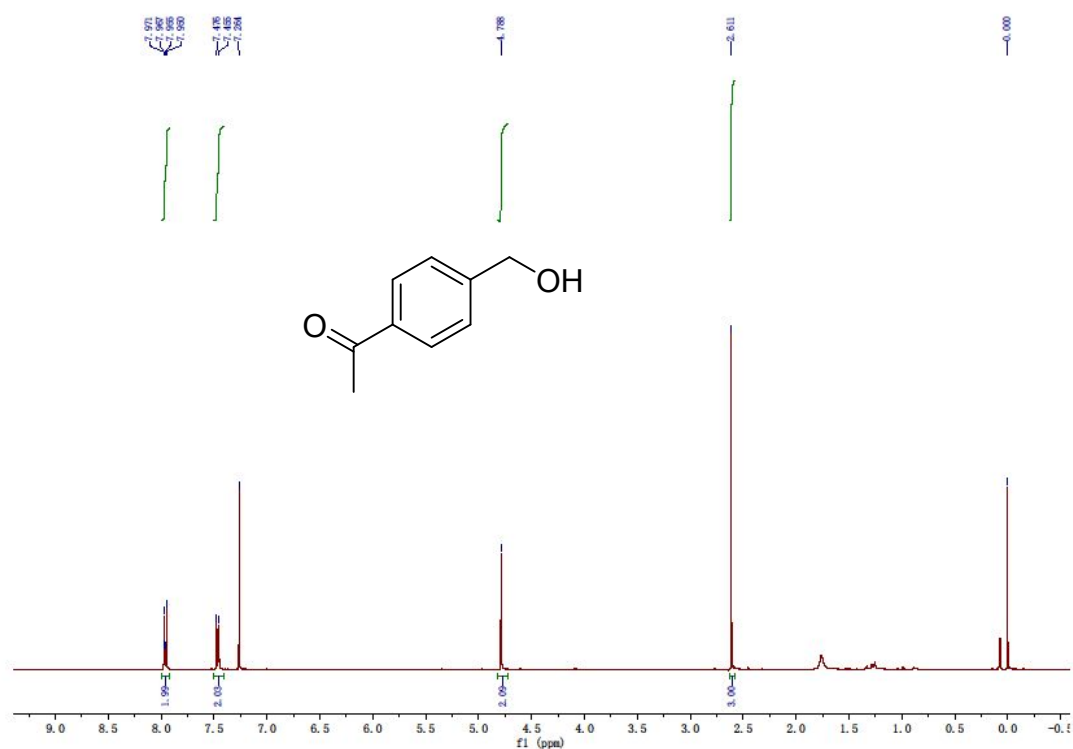

$^{13}\text{C}\{^1\text{H}\}$  NMR spectra of **3o** (100 MHz,  $\text{CDCl}_3$ ):

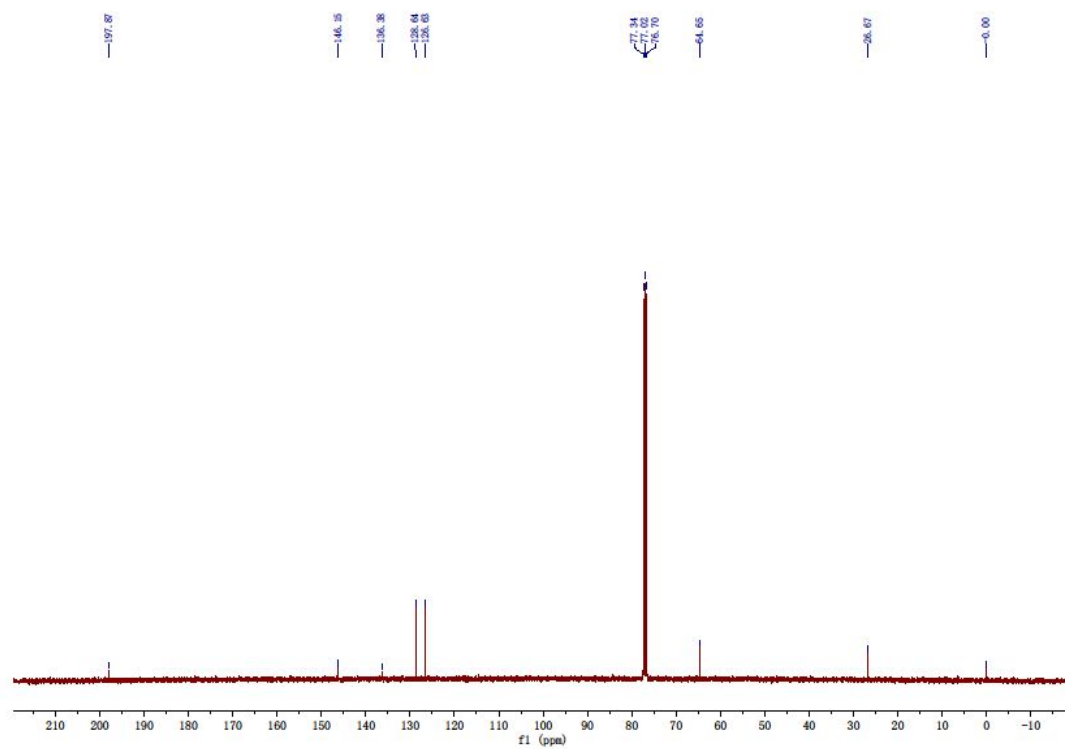

$^1\text{H}$  NMR spectra of **3p** (400 MHz,  $\text{CDCl}_3$ ):

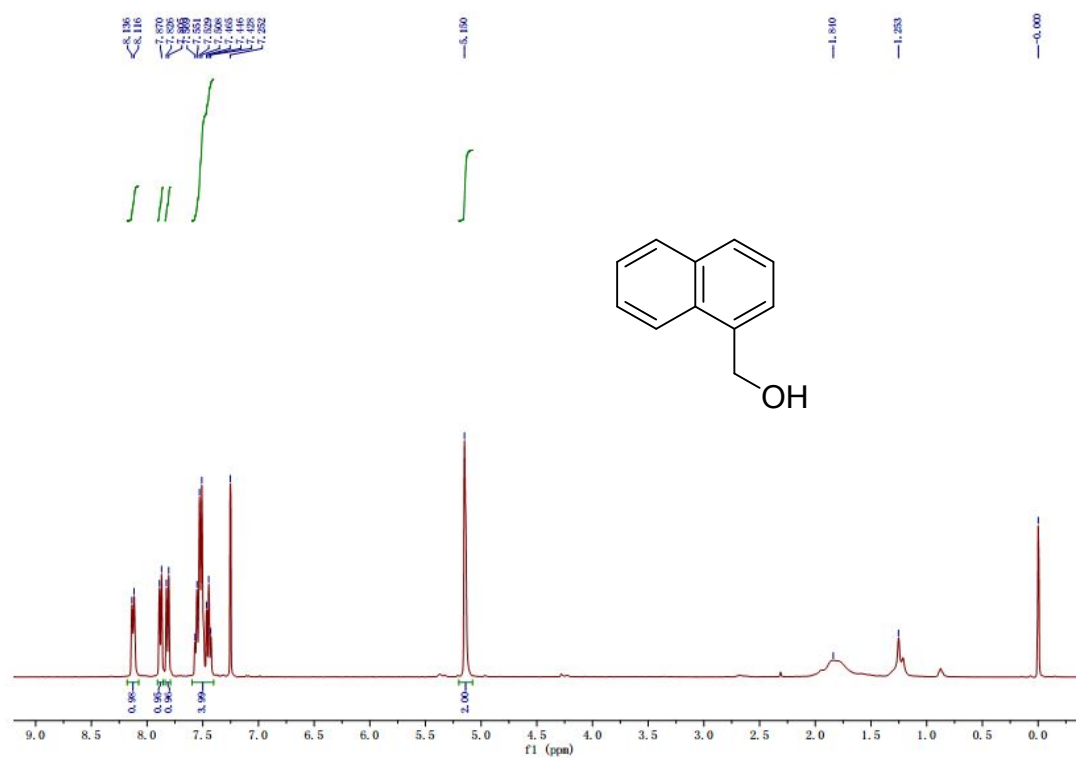

<sup>1</sup>H NMR spectra of **3q** (400 MHz, CDCl<sub>3</sub>):

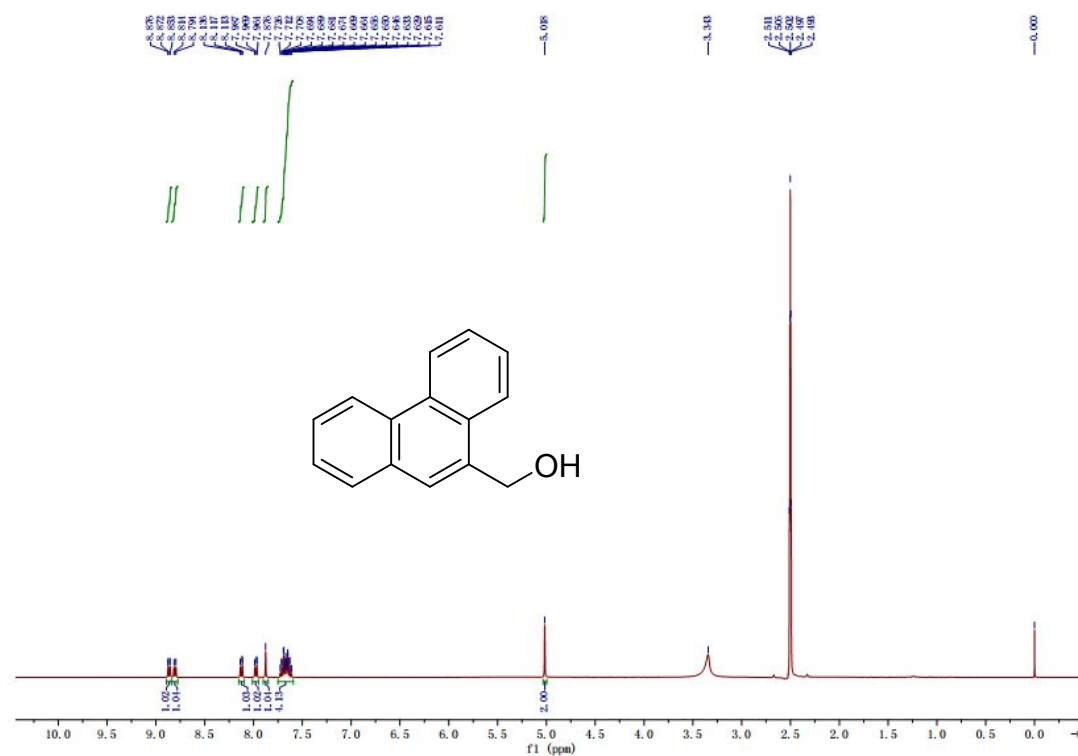

$^{13}\text{C}\{^1\text{H}\}$  NMR spectra of **3q** (100 MHz,  $\text{CDCl}_3$ ):

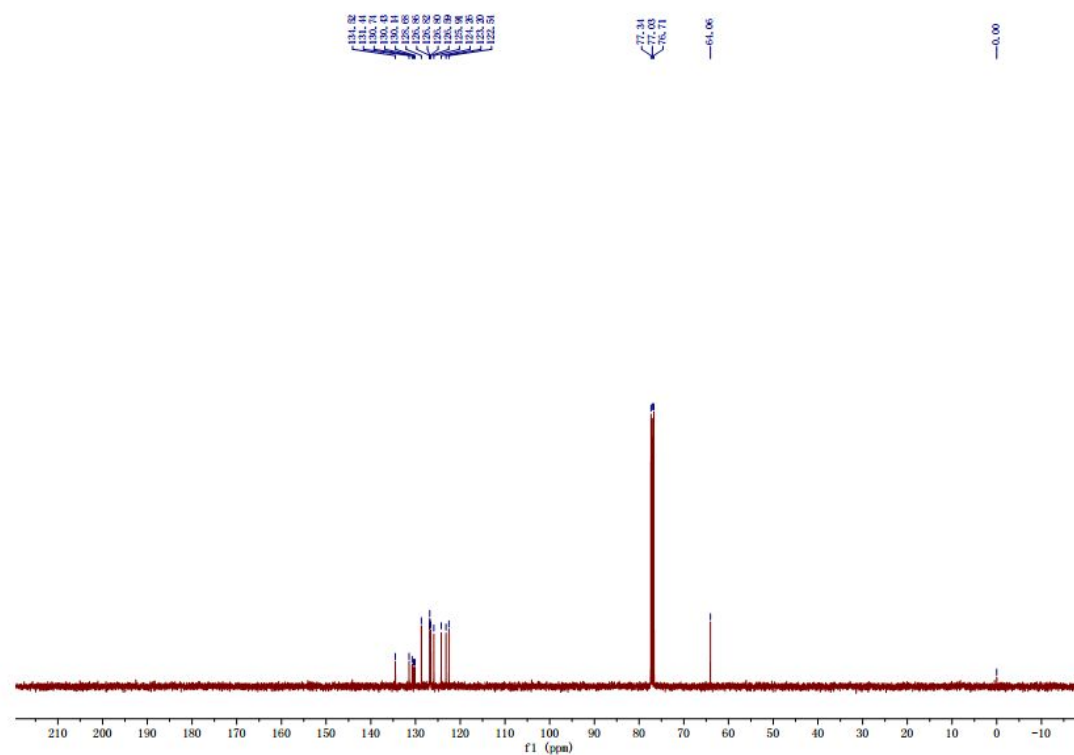

$^1\text{H}$  NMR spectra of **3r** (400 MHz,  $\text{CDCl}_3$ ):

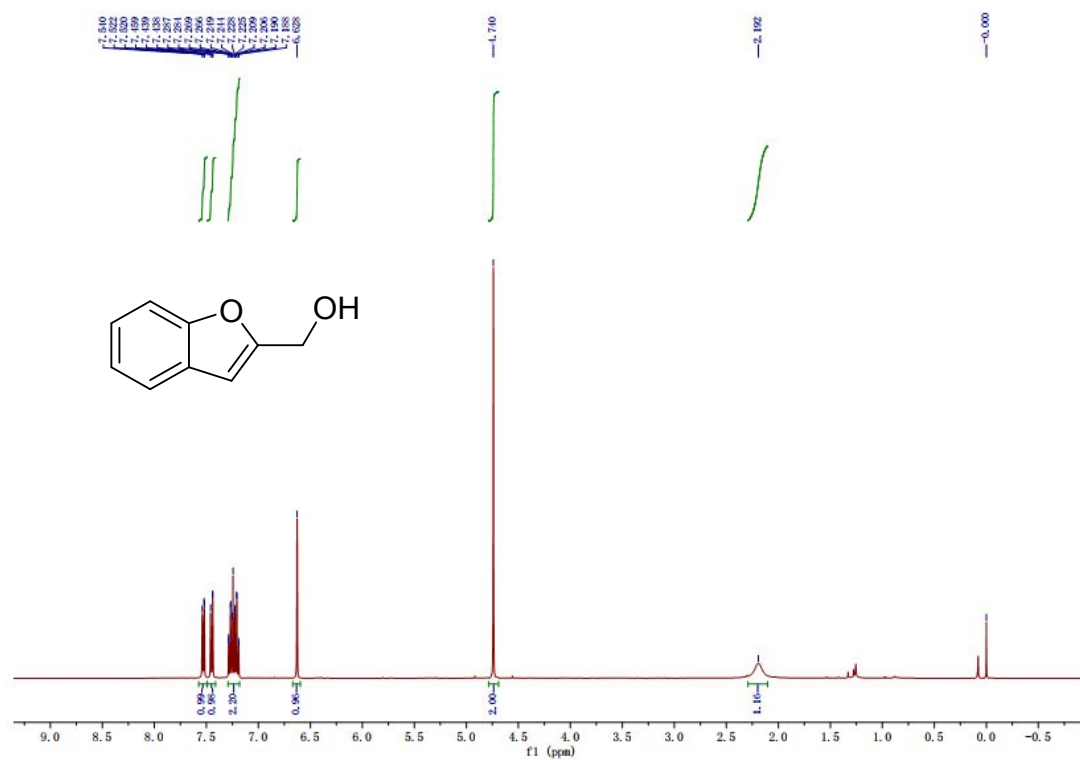

$^{13}\text{C}\{^1\text{H}\}$  NMR spectra of **3r** (100 MHz,  $\text{CDCl}_3$ ):

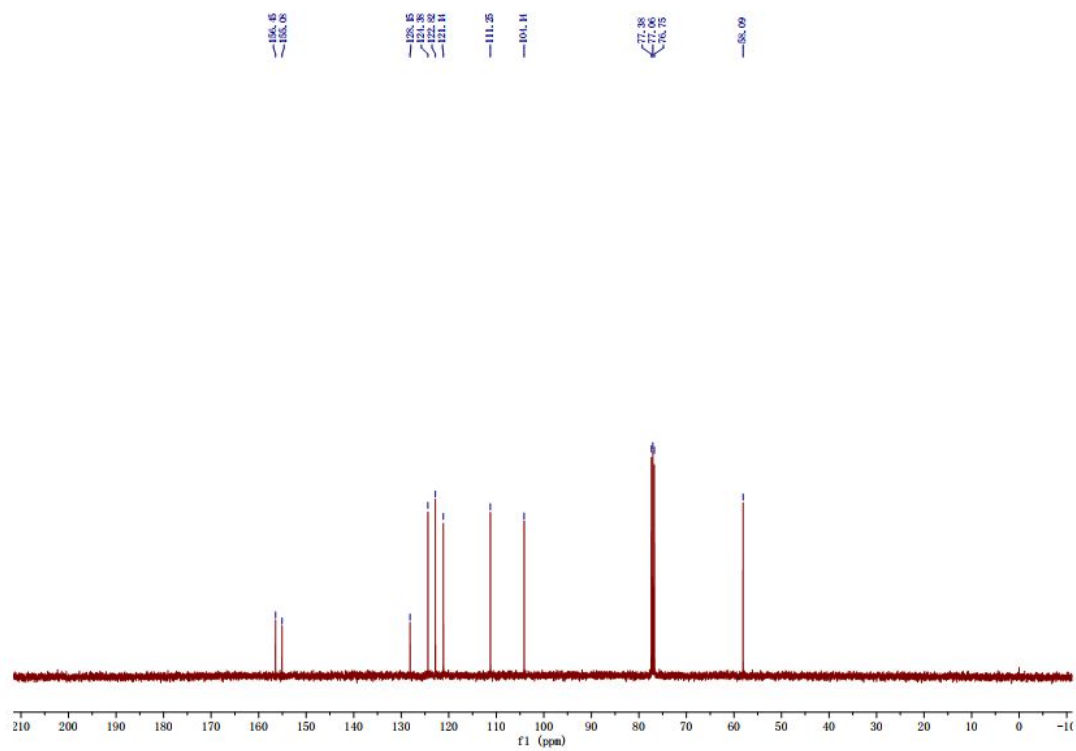

$^1\text{H}$  NMR spectra of **3s** (400 MHz,  $\text{CDCl}_3$ ):

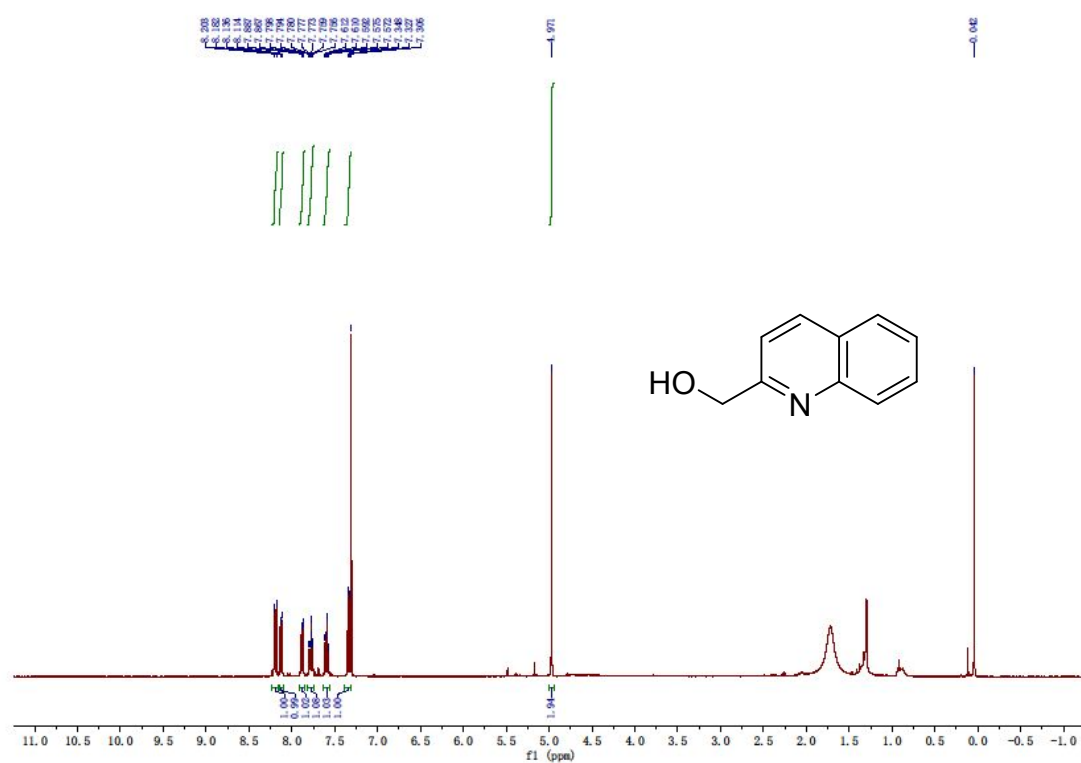

$^{13}\text{C}\{^1\text{H}\}$  NMR spectra of **3s** (100 MHz,  $\text{CDCl}_3$ ):

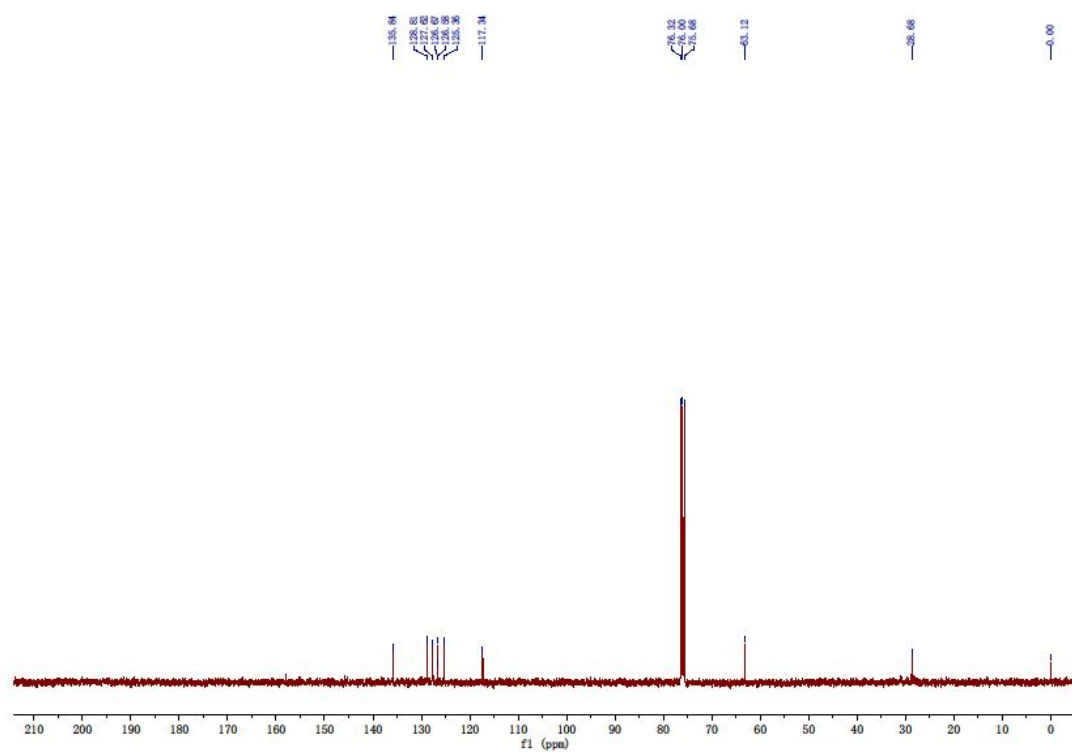

$^1\text{H}$  NMR spectra of **5a** (400 MHz,  $\text{CDCl}_3$ ):

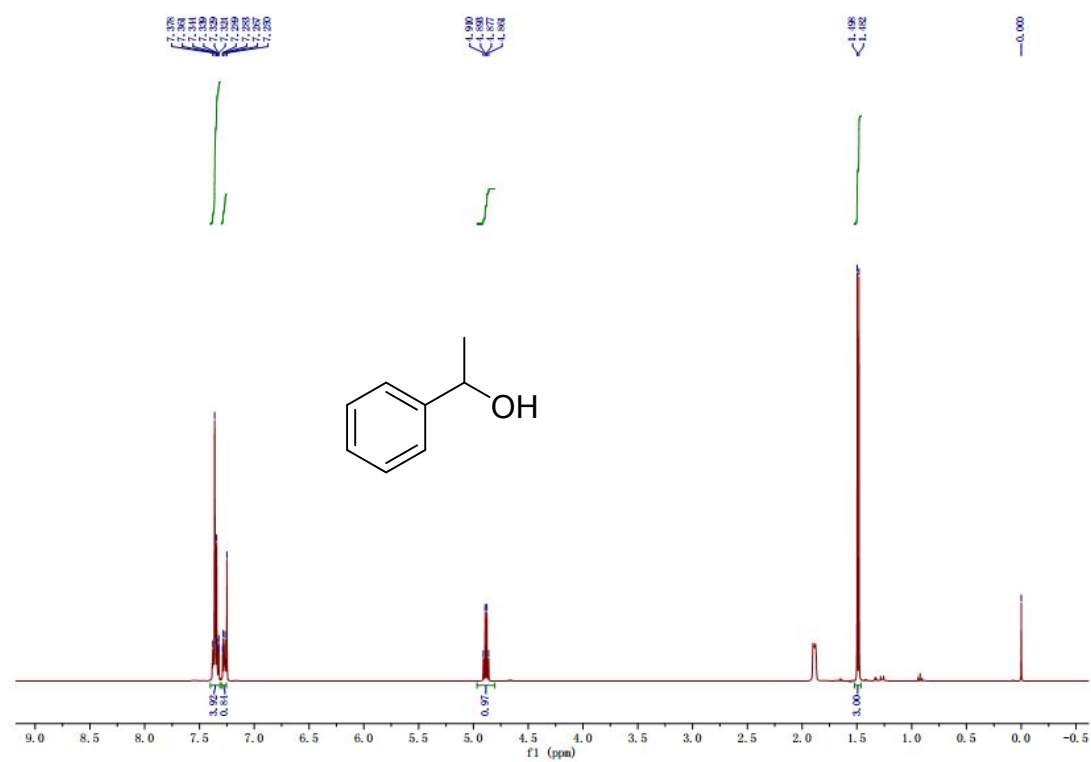

$^{13}\text{C}\{^1\text{H}\}$  NMR spectra of **5a** (100 MHz,  $\text{CDCl}_3$ ):

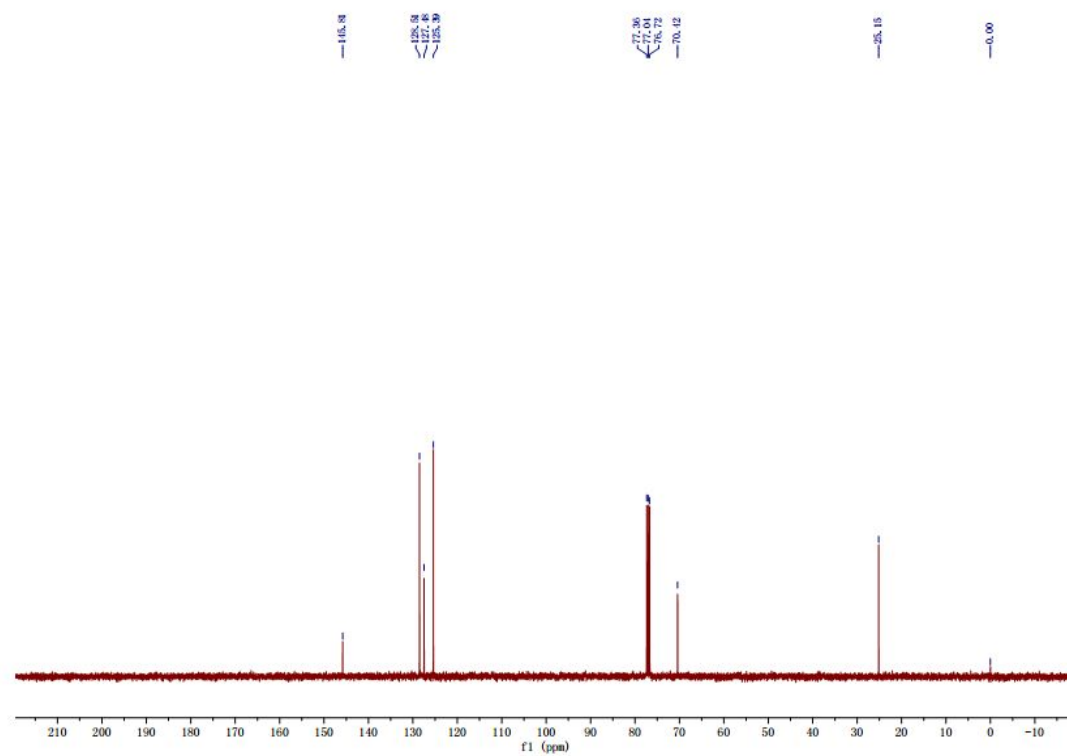

$^1\text{H}$  NMR spectra of **5b** (400 MHz,  $\text{CDCl}_3$ ):

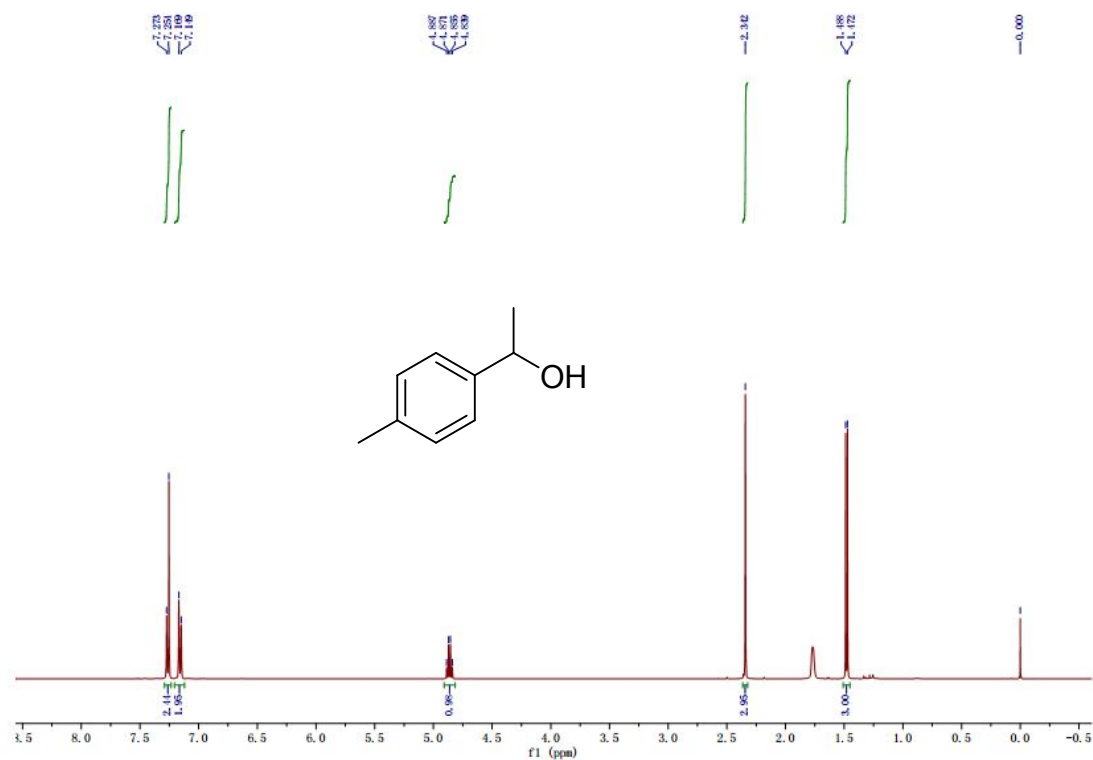

$^{13}\text{C}\{^1\text{H}\}$  NMR spectra of **5b** (100 MHz,  $\text{CDCl}_3$ ):

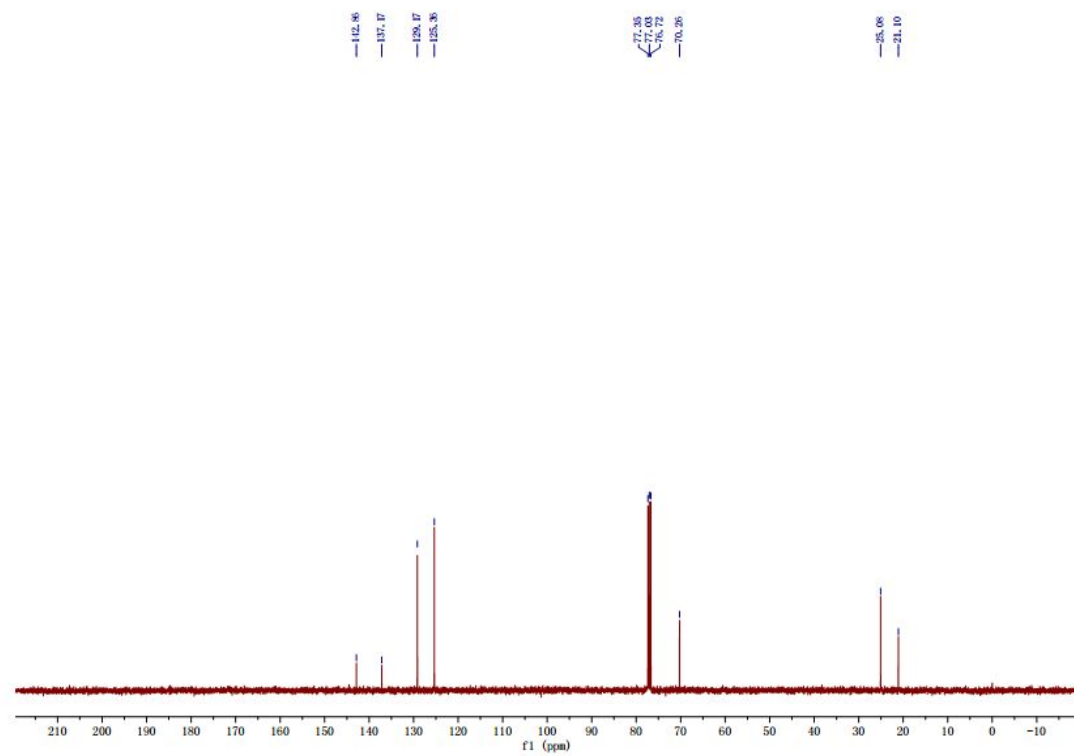



<sup>1</sup>H NMR spectra of **5c** (400 MHz, CDCl<sub>3</sub>):

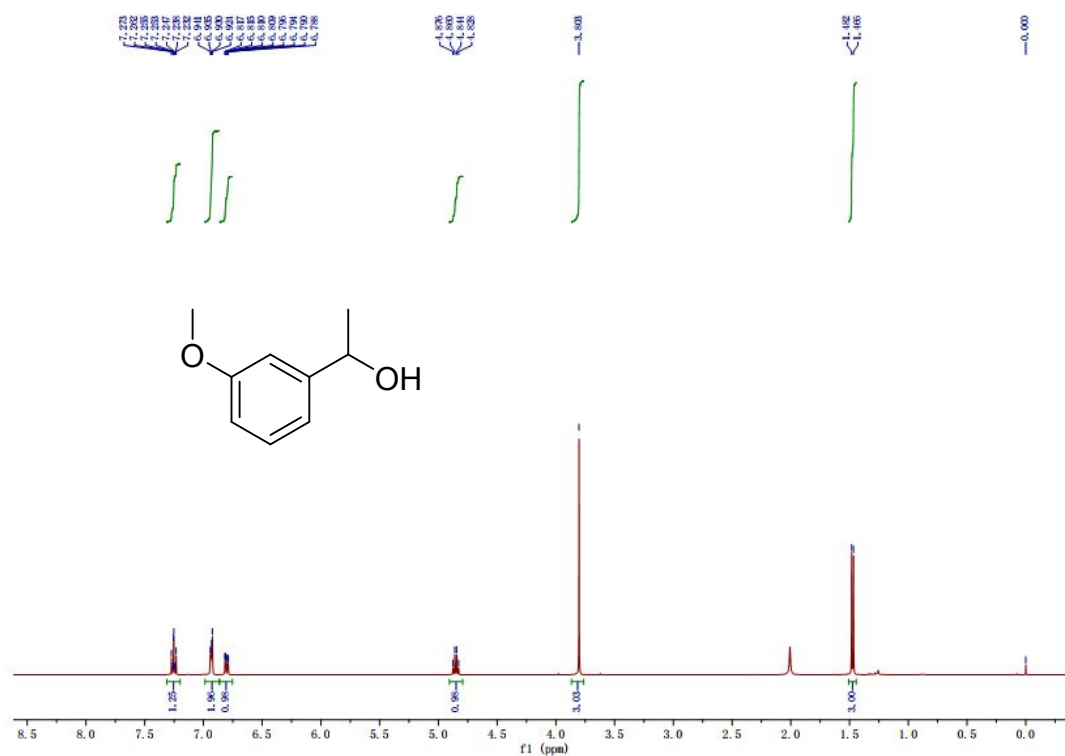

$^{13}\text{C}\{^1\text{H}\}$  NMR spectra of **5c** (100 MHz,  $\text{CDCl}_3$ ):

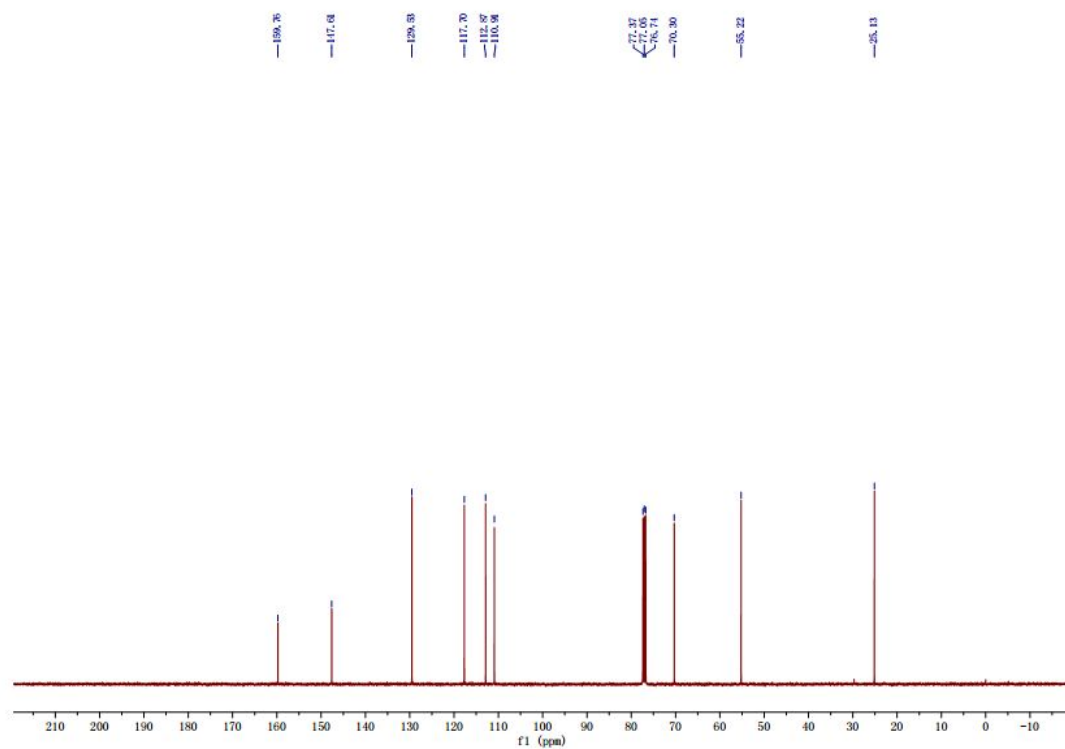

$^1\text{H}$  NMR spectra of **5d** (400 MHz,  $\text{CDCl}_3$ ):

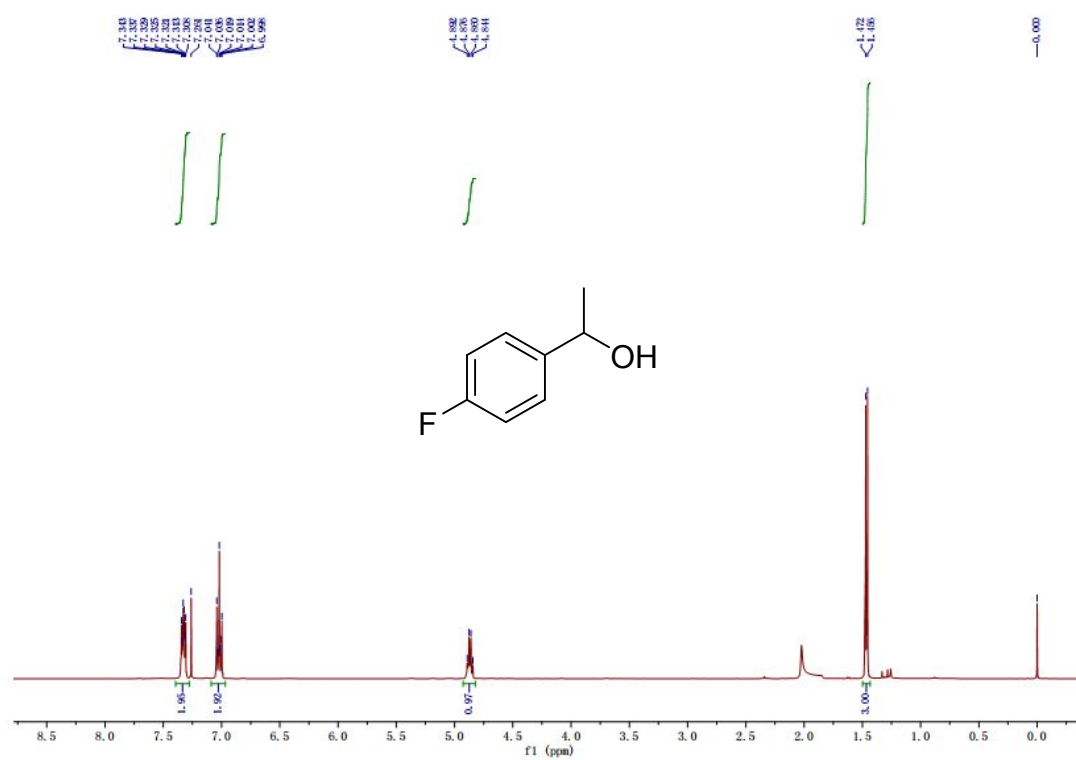

$^{13}\text{C}\{^1\text{H}\}$  NMR spectra of **5d** (100 MHz,  $\text{CDCl}_3$ ):

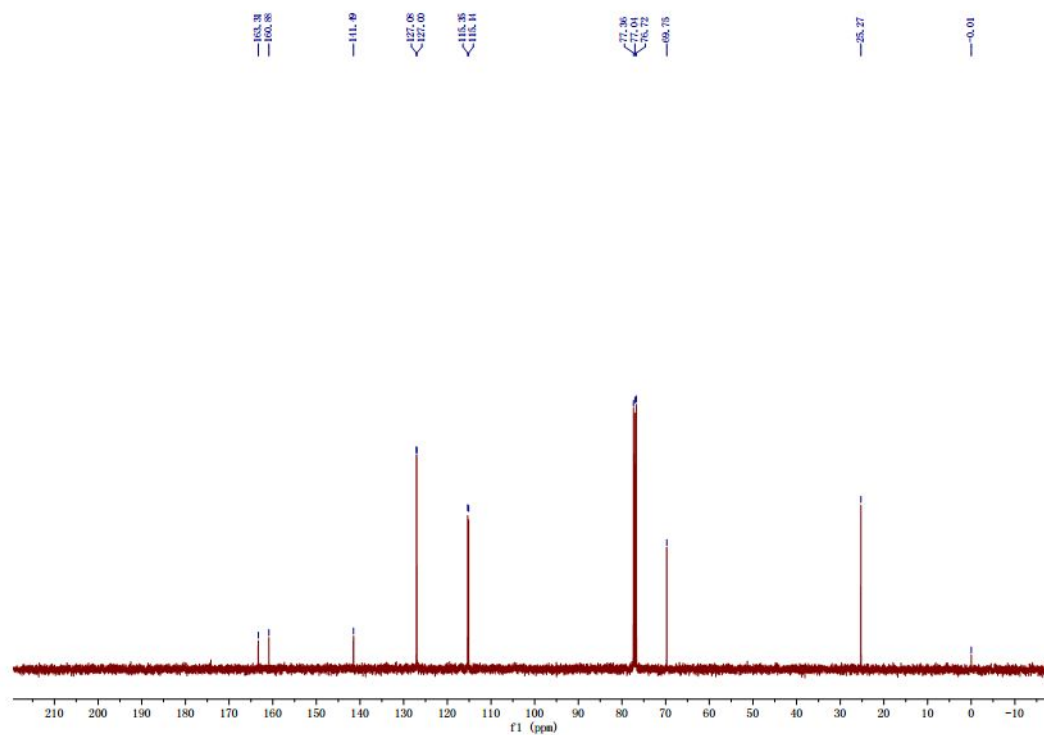

$^{19}\text{F}$  NMR spectra of **5d** (377 MHz,  $\text{CDCl}_3$ ):

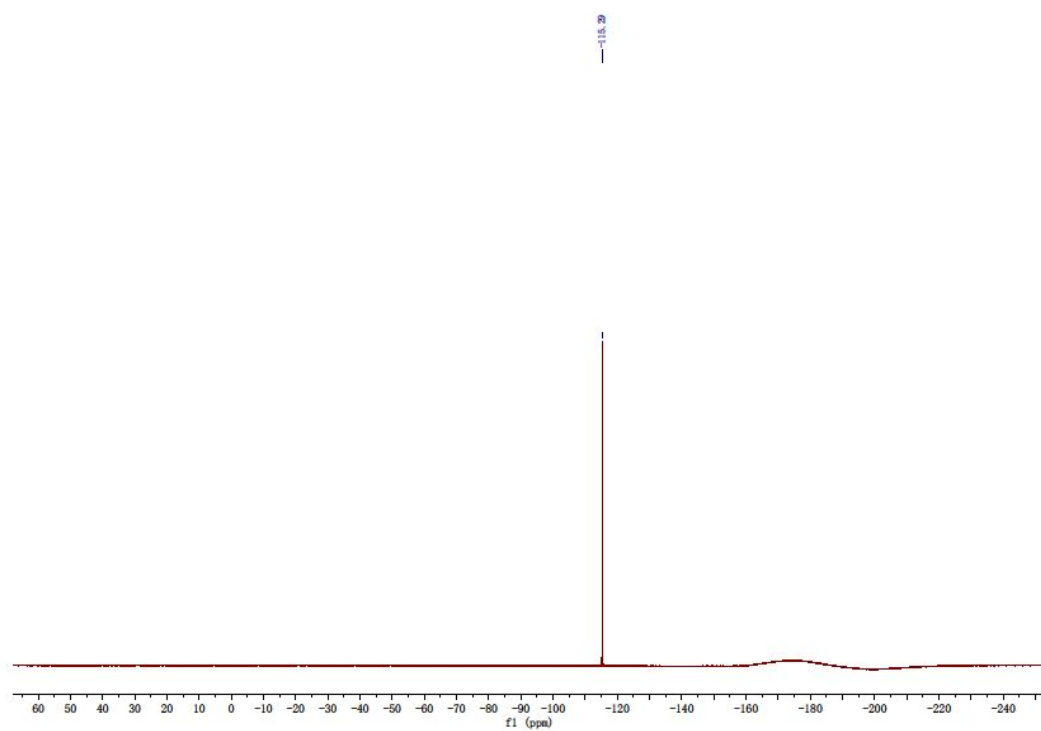

$^1\text{H}$  NMR spectra of **5e** (400 MHz,  $\text{CDCl}_3$ ):

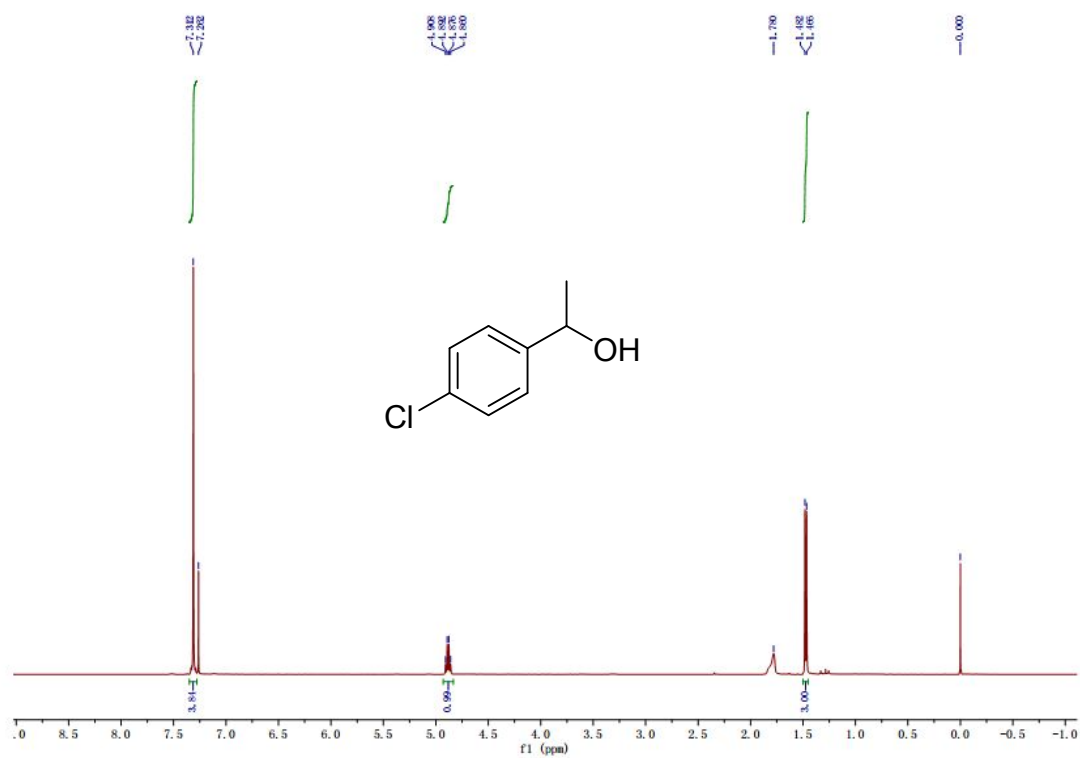

$^{13}\text{C}\{^1\text{H}\}$  NMR spectra of **5e** (100 MHz,  $\text{CDCl}_3$ ):

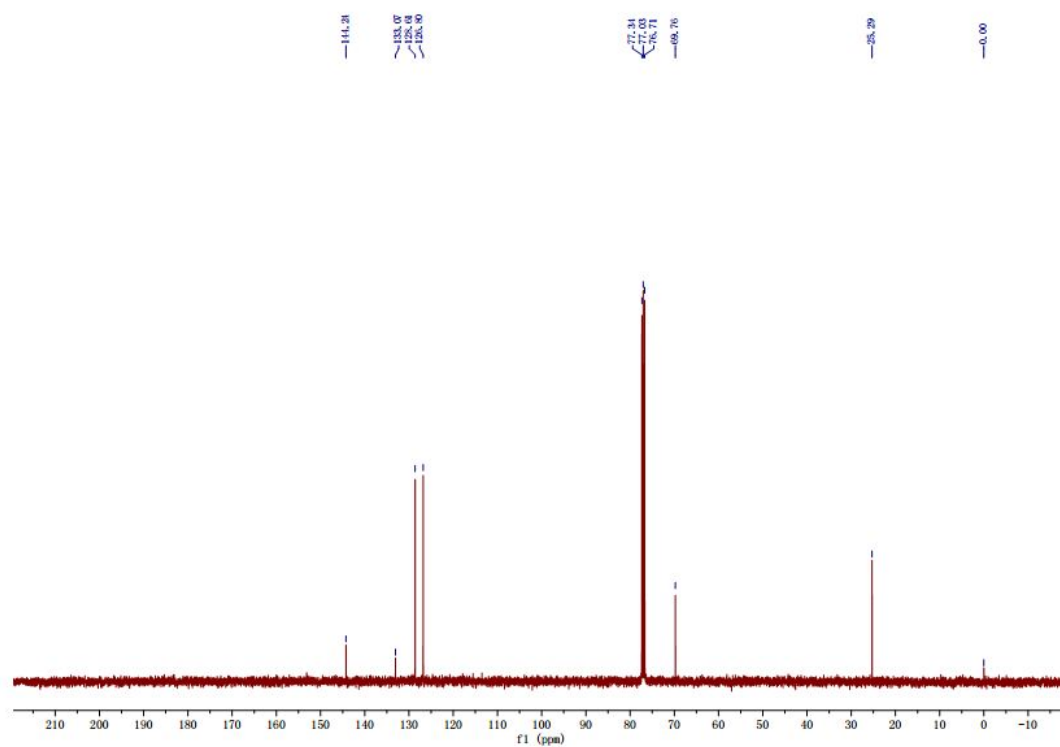

$^1\text{H}$  NMR spectra of **5f** (400 MHz,  $\text{CDCl}_3$ ):

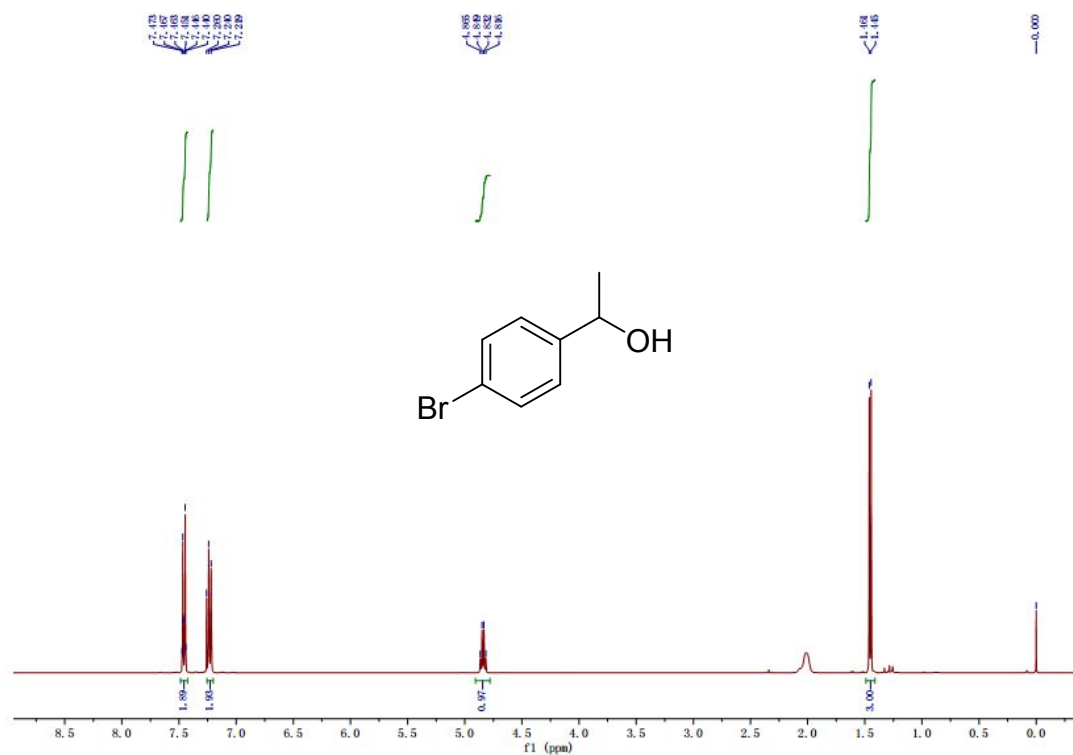

$^{13}\text{C}\{^1\text{H}\}$  NMR spectra of **5f** (100 MHz,  $\text{CDCl}_3$ ):

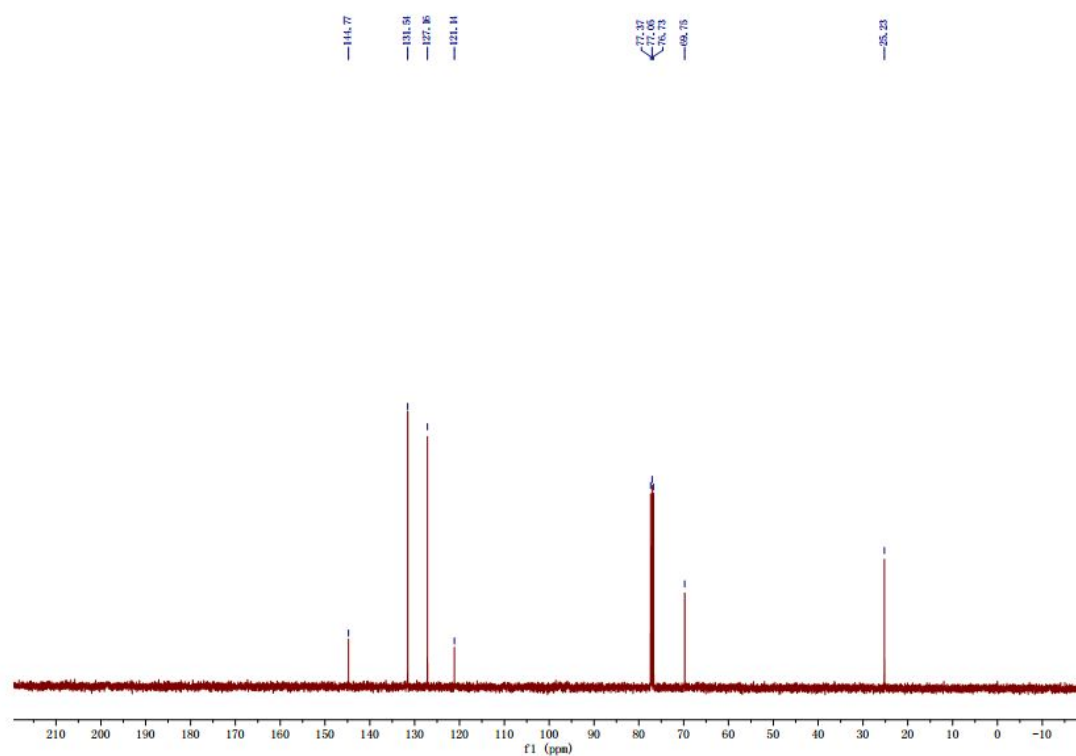

<sup>1</sup>H NMR spectra of **5g** (400 MHz, CDCl<sub>3</sub>):

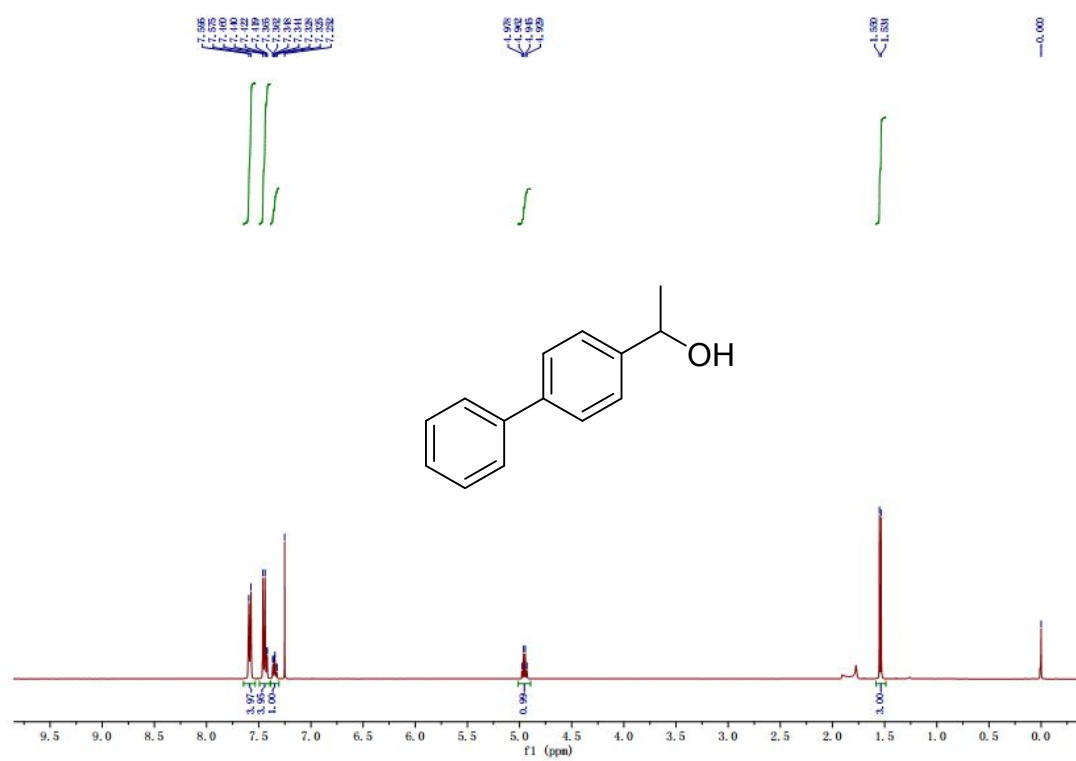

$^{13}\text{C}\{^1\text{H}\}$  NMR spectra of **5g** (100 MHz,  $\text{CDCl}_3$ ):

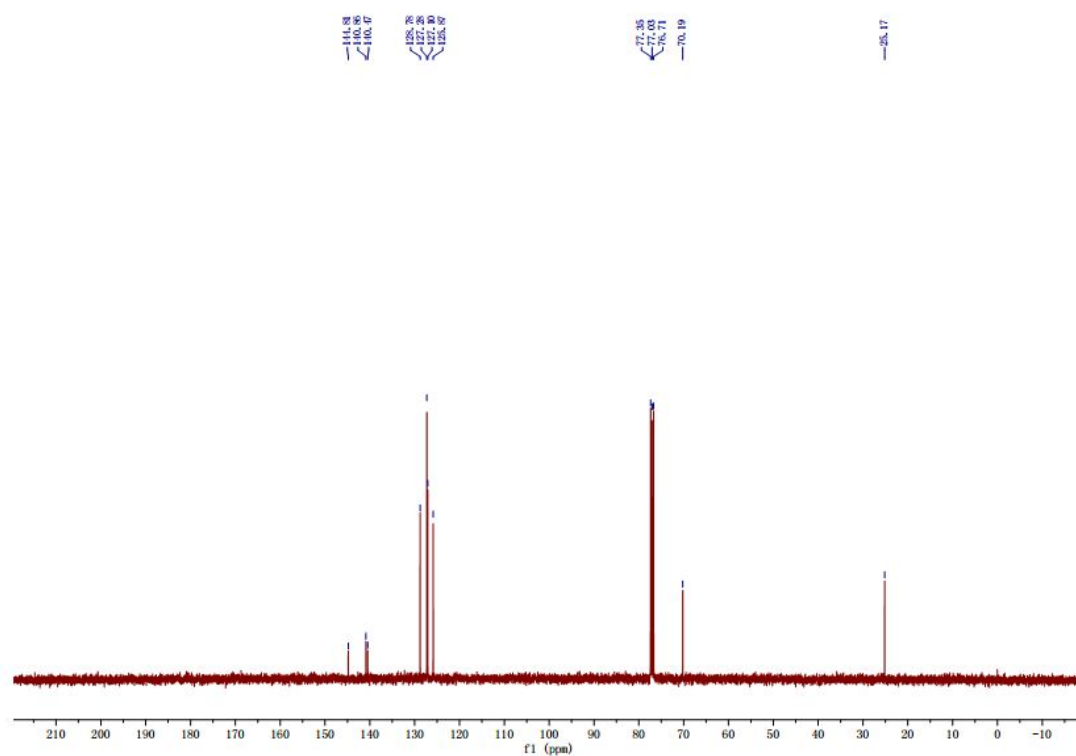

$^1\text{H}$  NMR spectra of **5h** (400 MHz,  $\text{CDCl}_3$ ):

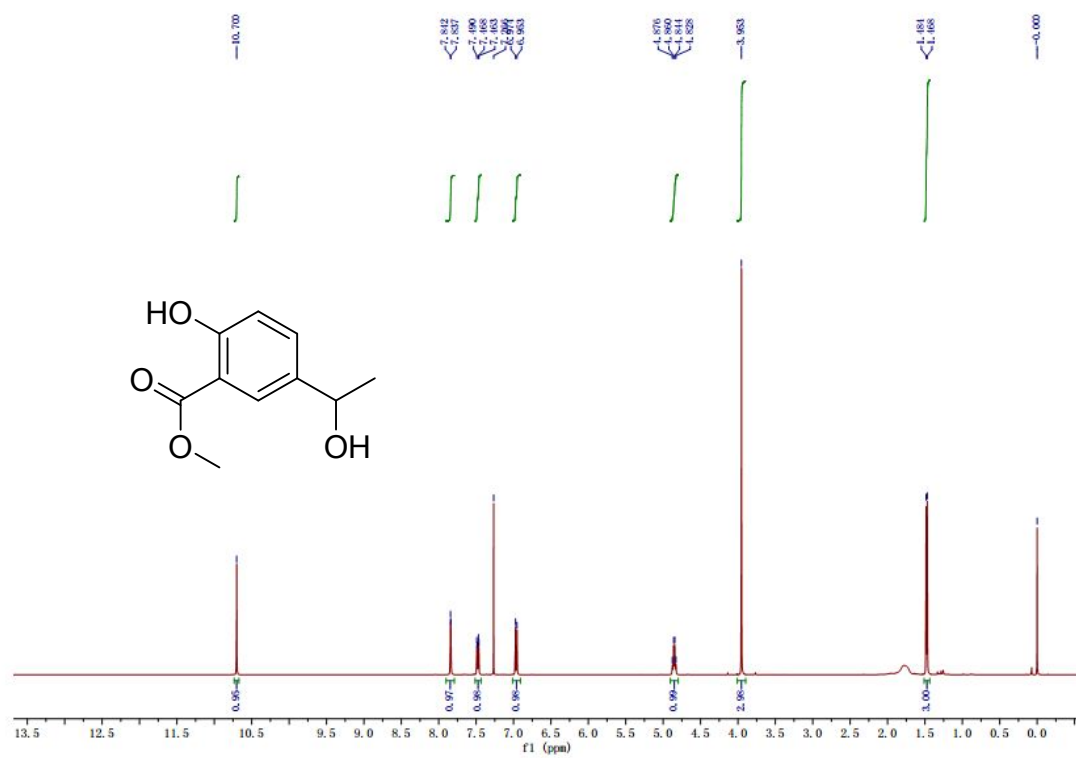

$^{13}\text{C}\{^1\text{H}\}$  NMR spectra of **5h** (100 MHz,  $\text{CDCl}_3$ ):

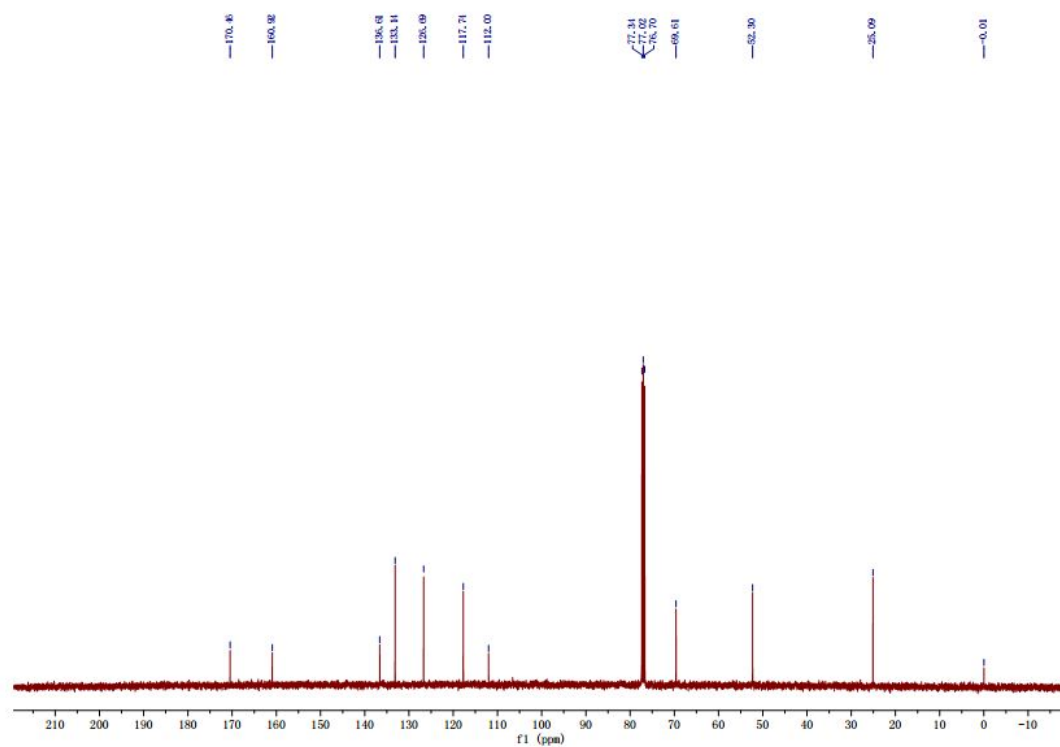

$^1\text{H}$  NMR spectra of **5i** (400 MHz,  $\text{CDCl}_3$ ):

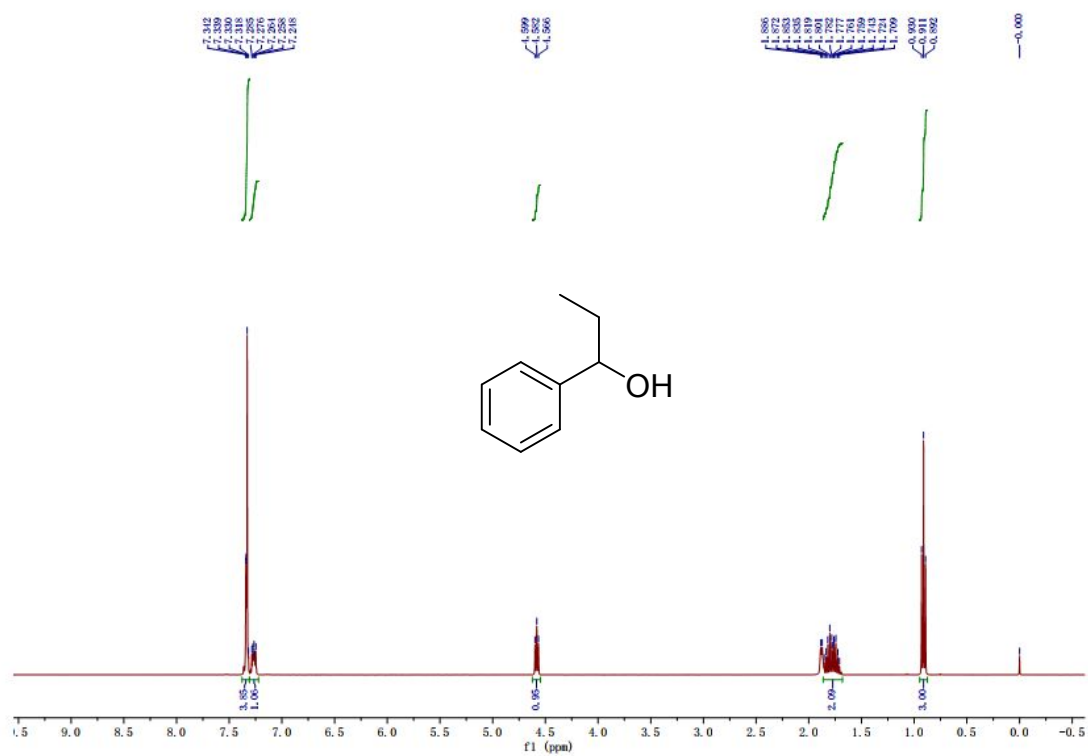

$^{13}\text{C}\{^1\text{H}\}$  NMR spectra of **5i** (100 MHz,  $\text{CDCl}_3$ ):

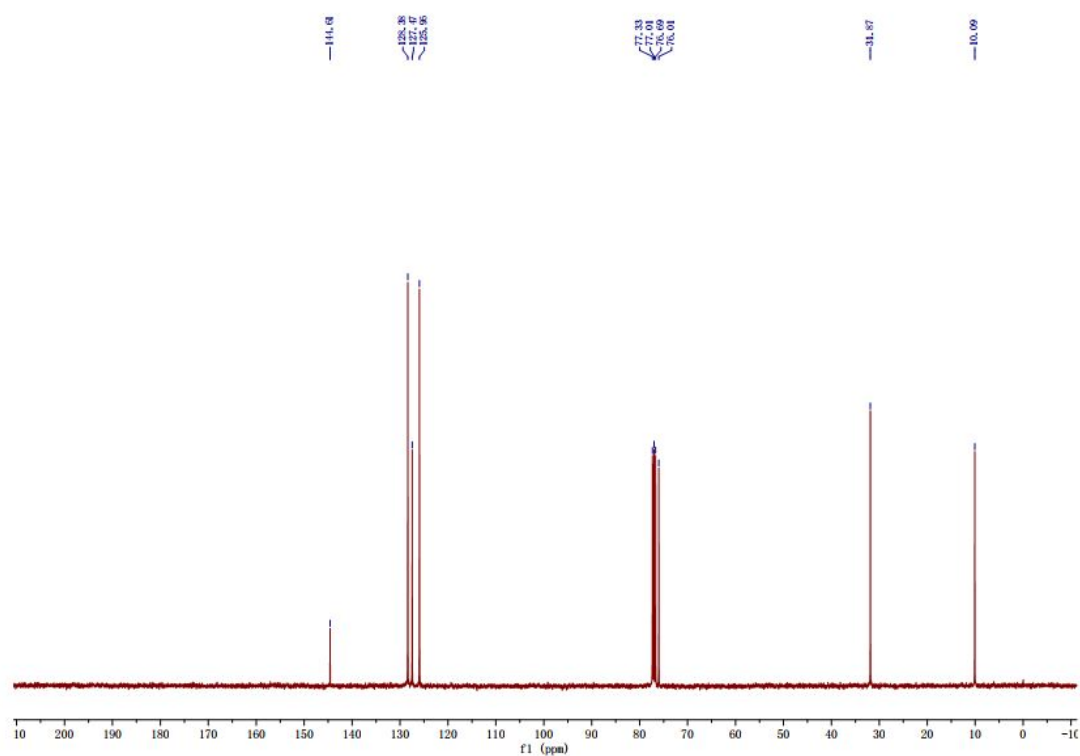

$^1\text{H}$  NMR spectra of **5j** (400 MHz,  $\text{CDCl}_3$ ):

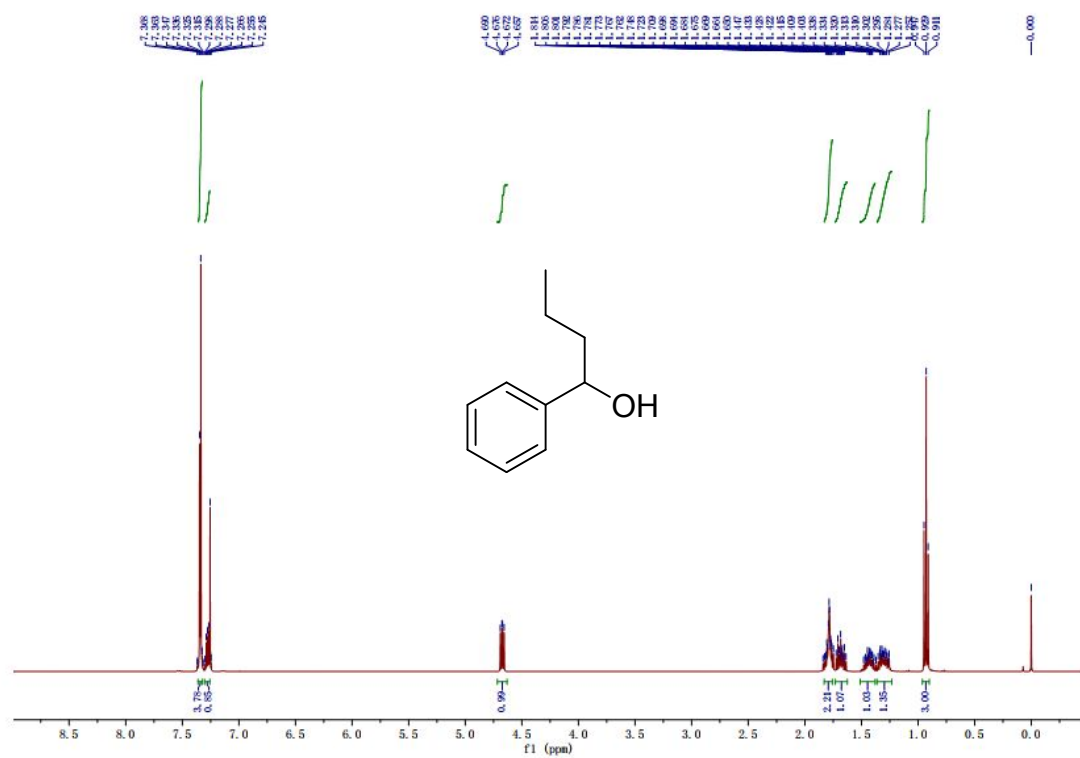



$^{13}\text{C}\{^1\text{H}\}$  NMR spectra of **5j** (100 MHz,  $\text{CDCl}_3$ ):

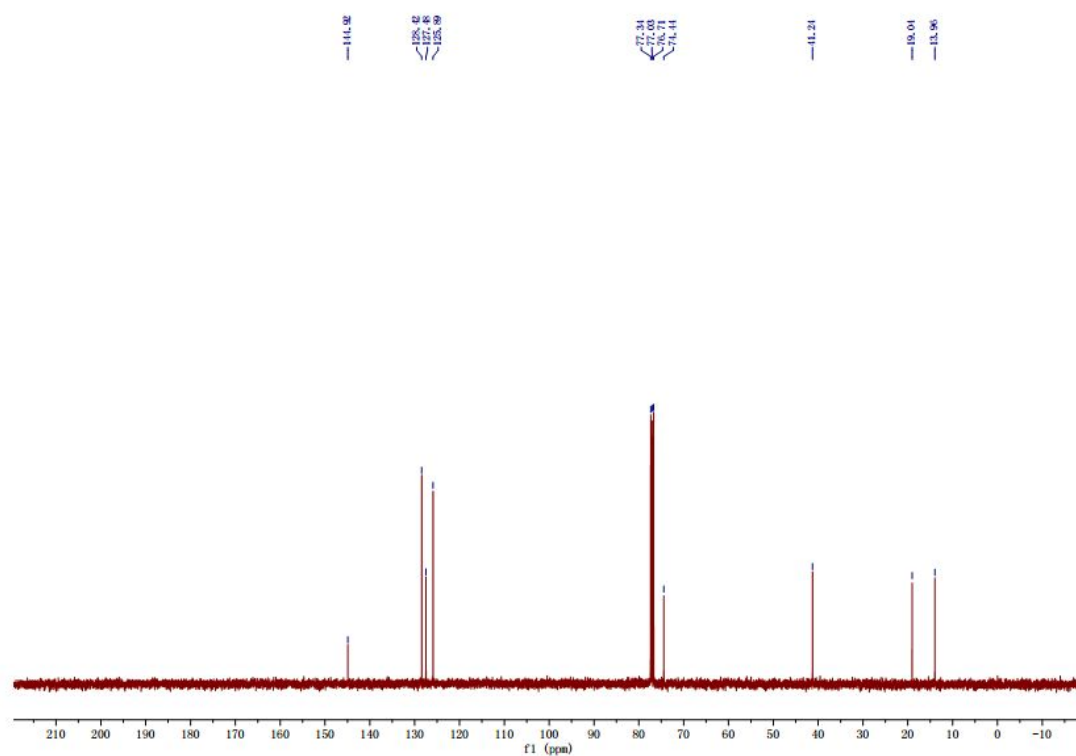

$^1\text{H}$  NMR spectra of **5j** (400 MHz,  $\text{CDCl}_3$ ):

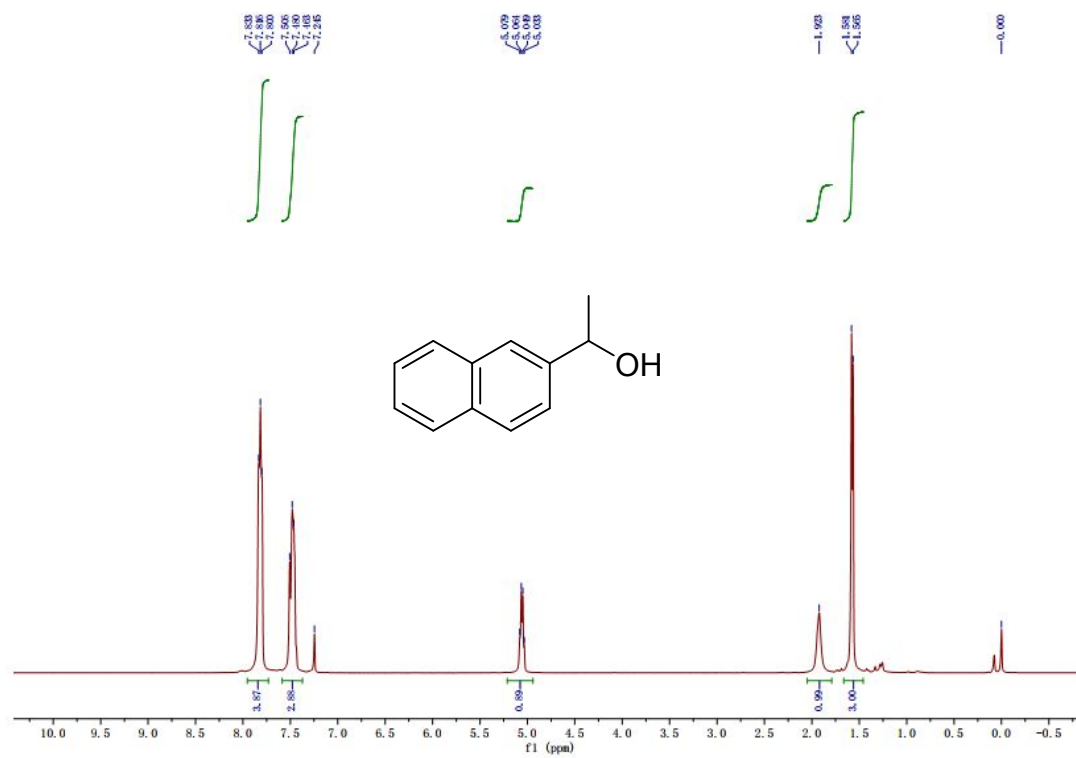

$^{13}\text{C}\{^1\text{H}\}$  NMR spectra of **5k** (100 MHz,  $\text{CDCl}_3$ ):

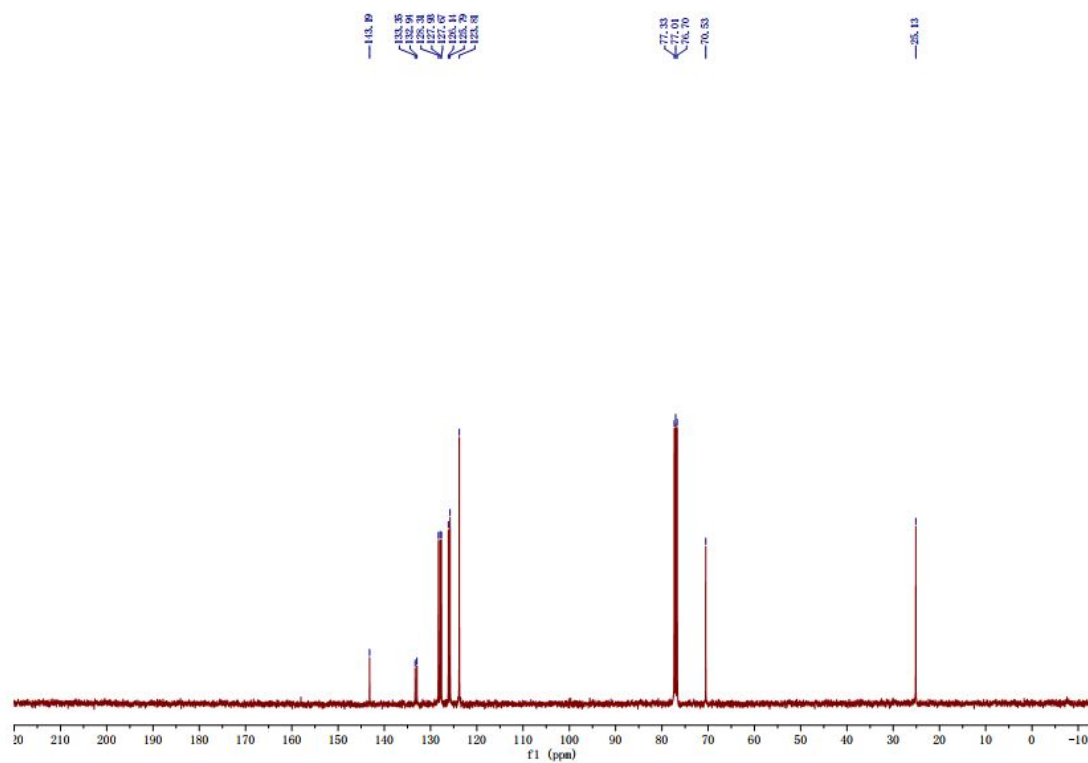

$^1\text{H}$  NMR spectra of **5l** (400 MHz,  $\text{CDCl}_3$ ):

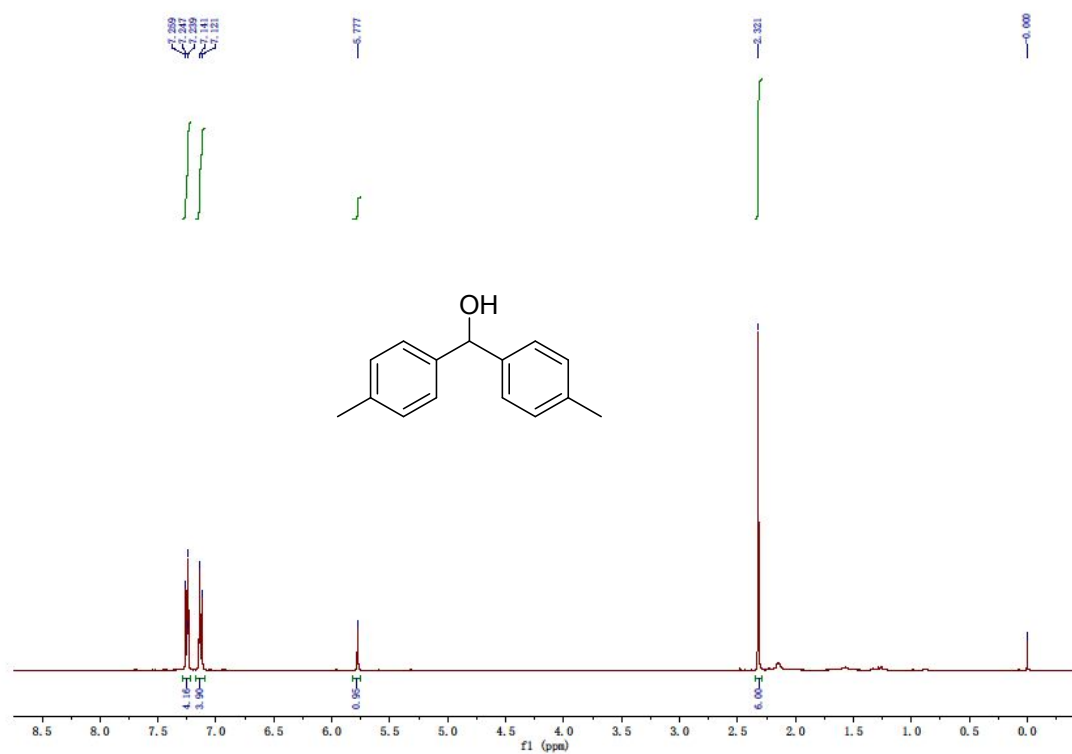

$^{13}\text{C}\{^1\text{H}\}$  NMR spectra of **5l** (100 MHz,  $\text{CDCl}_3$ ):

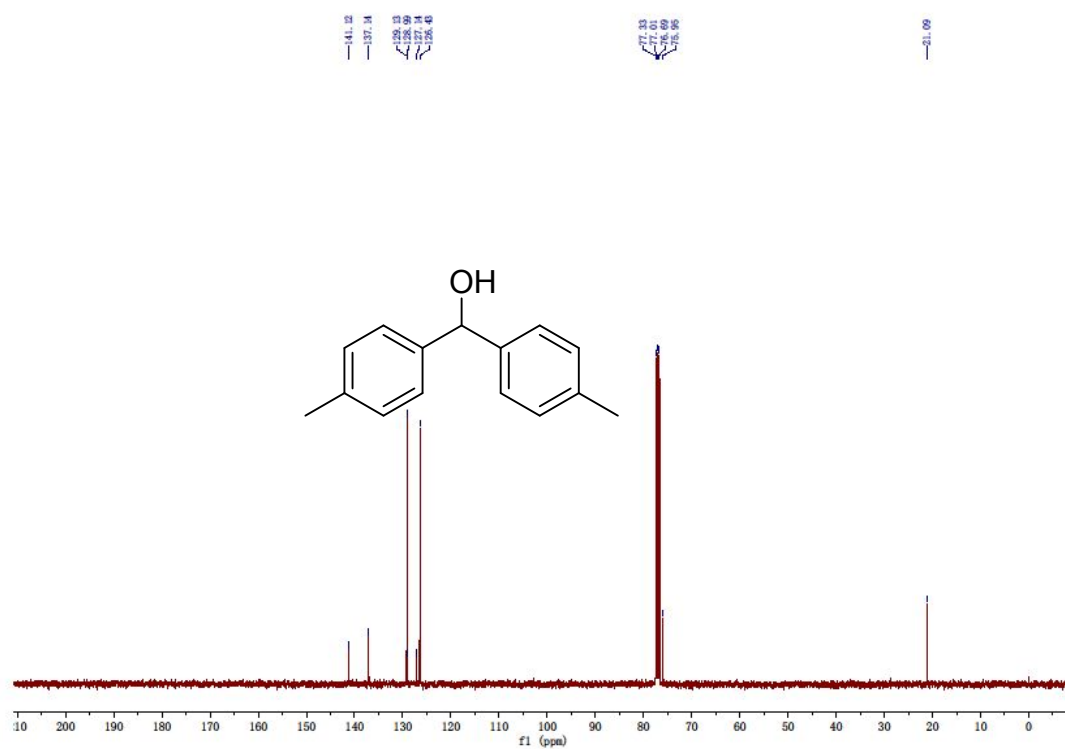

$^1\text{H}$  NMR spectra of **5m** (400 MHz,  $\text{CDCl}_3$ ):

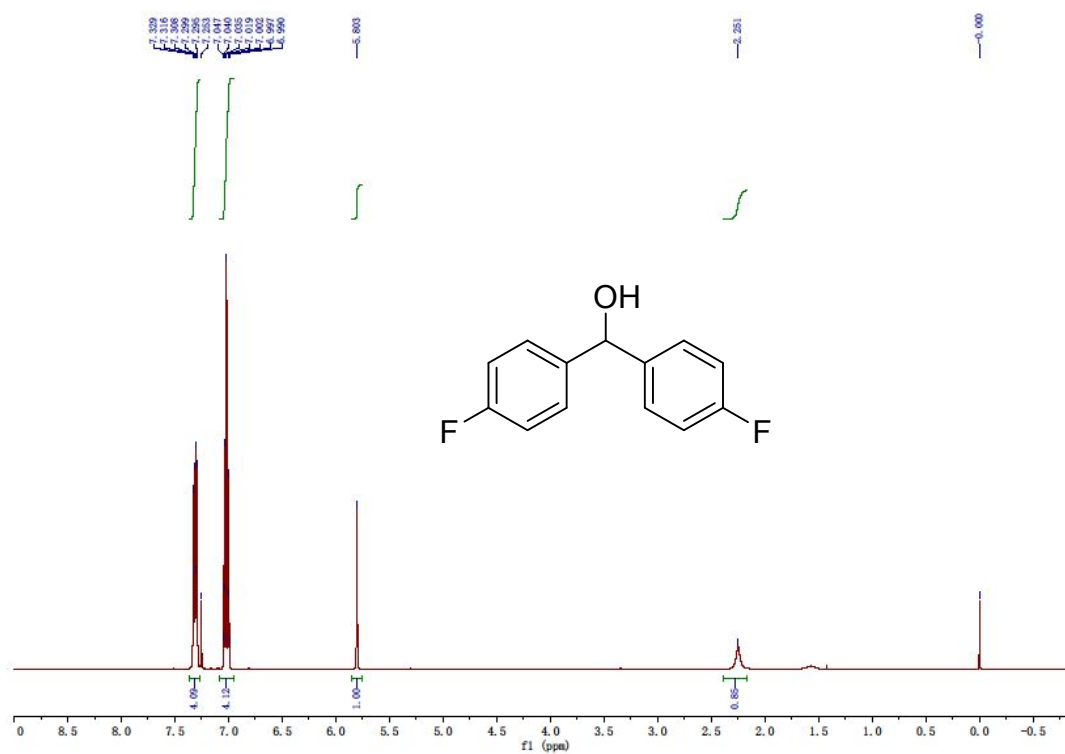

$^{13}\text{C}\{^1\text{H}\}$  NMR spectra of **5m** (100 MHz,  $\text{CDCl}_3$ ):

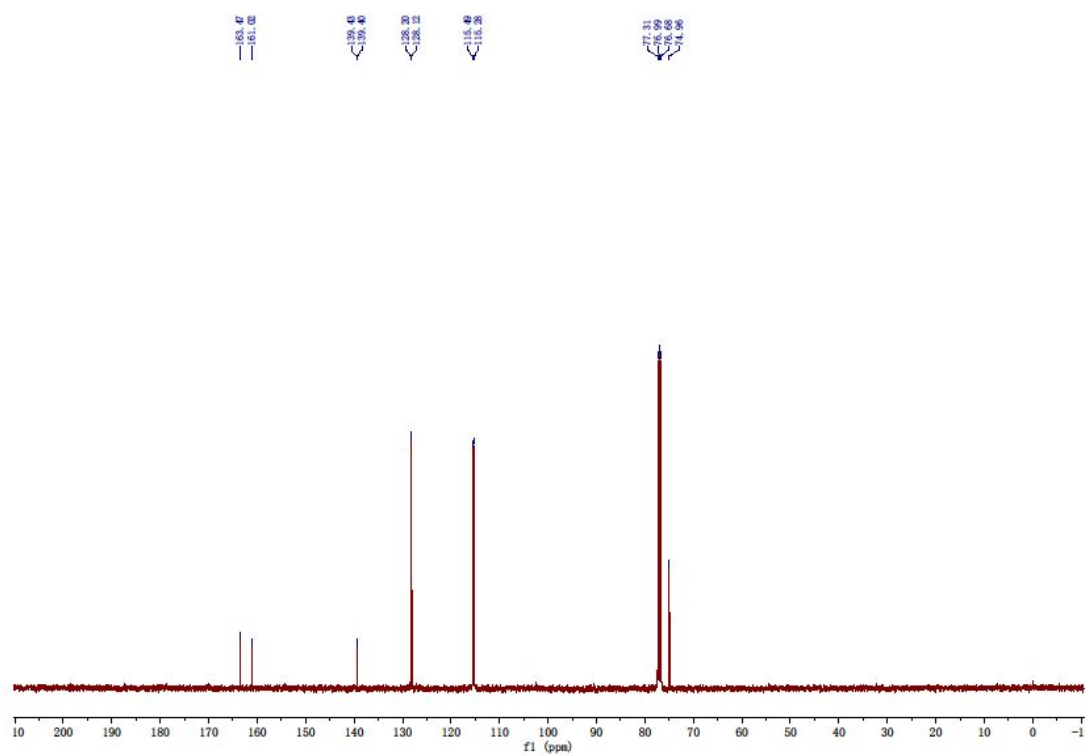

$^{19}\text{F}$  NMR spectra of **5m** (377 MHz,  $\text{CDCl}_3$ ):

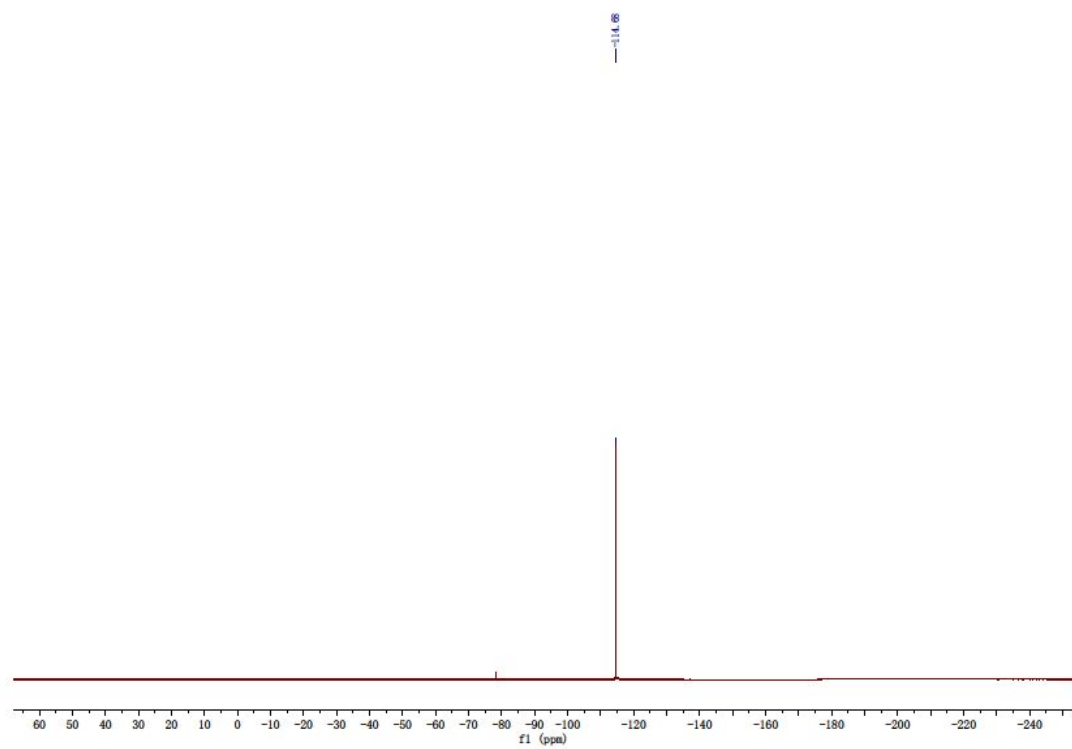

<sup>1</sup>H NMR spectra of **5n** (400 MHz, CDCl<sub>3</sub>):

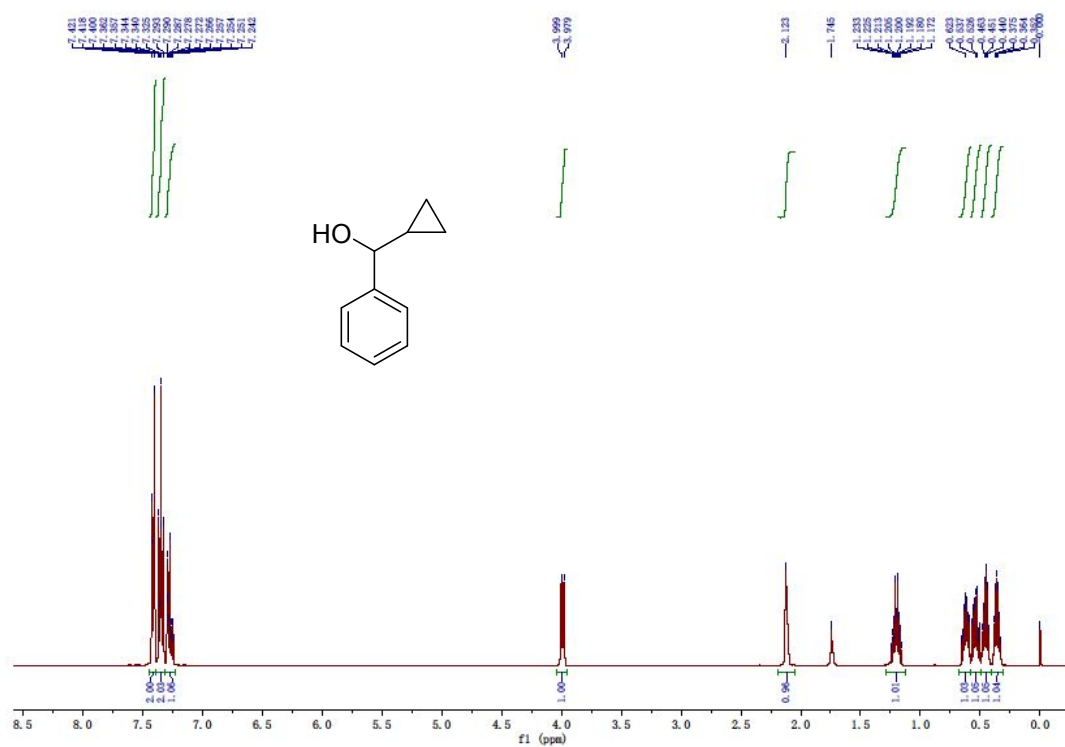

$^{13}\text{C}\{^1\text{H}\}$  NMR spectra of **5n** (100 MHz,  $\text{CDCl}_3$ ):

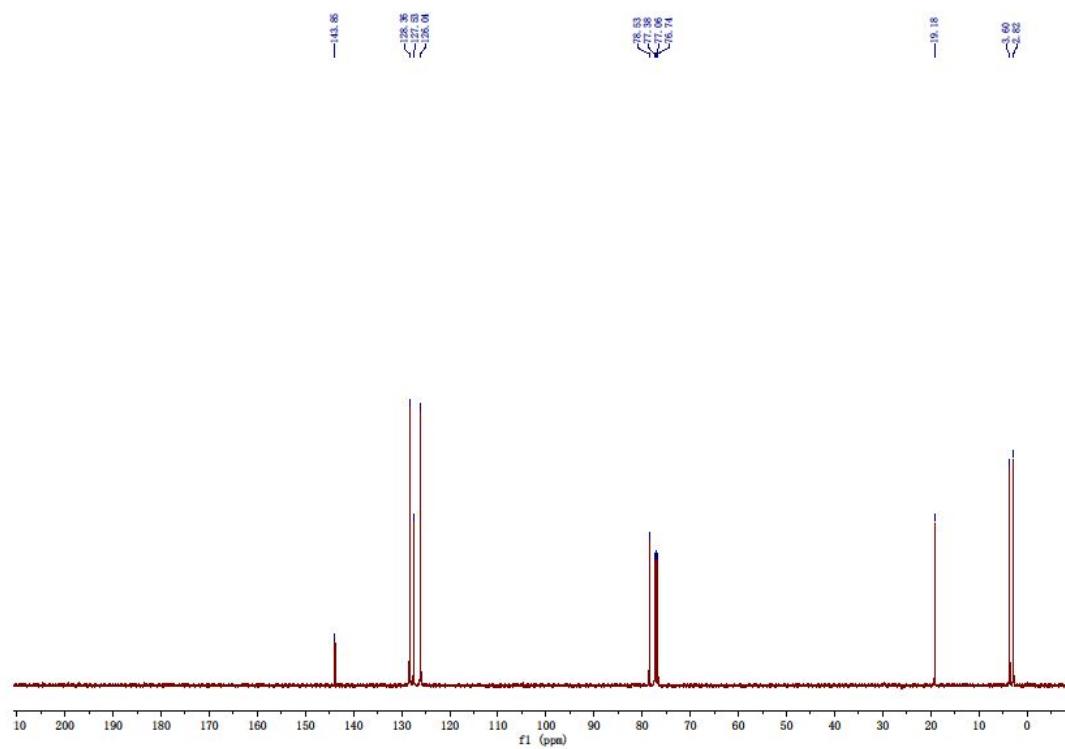

$^1\text{H}$  NMR spectra of **5o** (400 MHz,  $\text{CDCl}_3$ ):

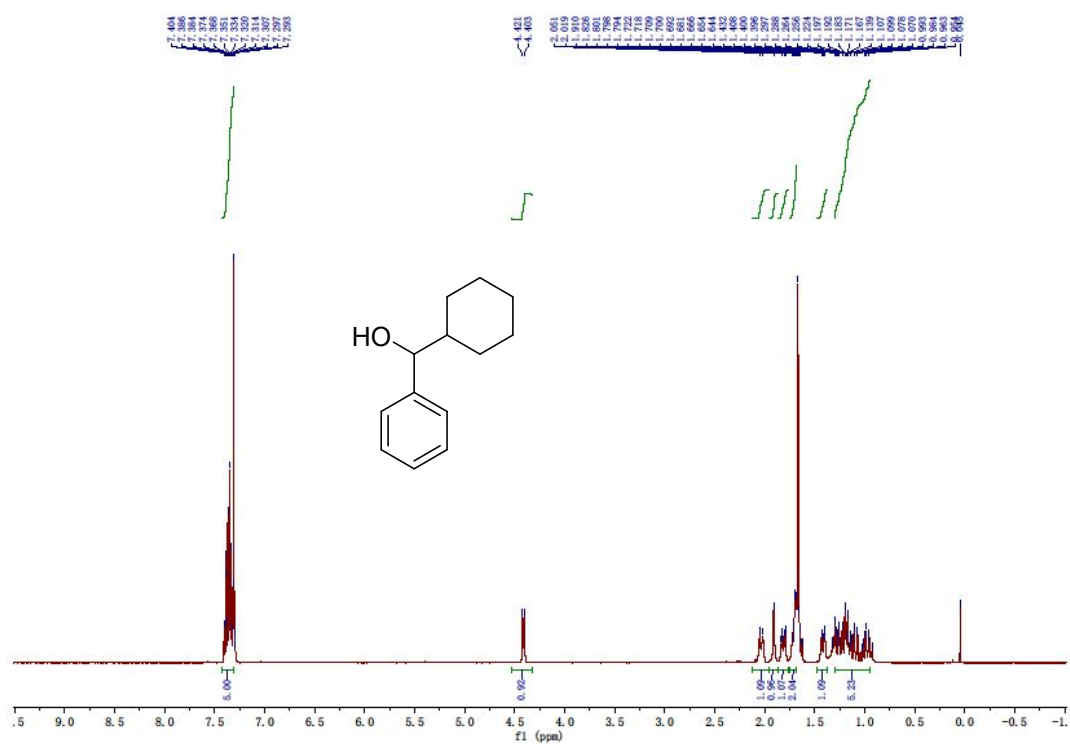

$^1\text{H}$  NMR spectra of **7a** (400 MHz,  $\text{CDCl}_3$ ):

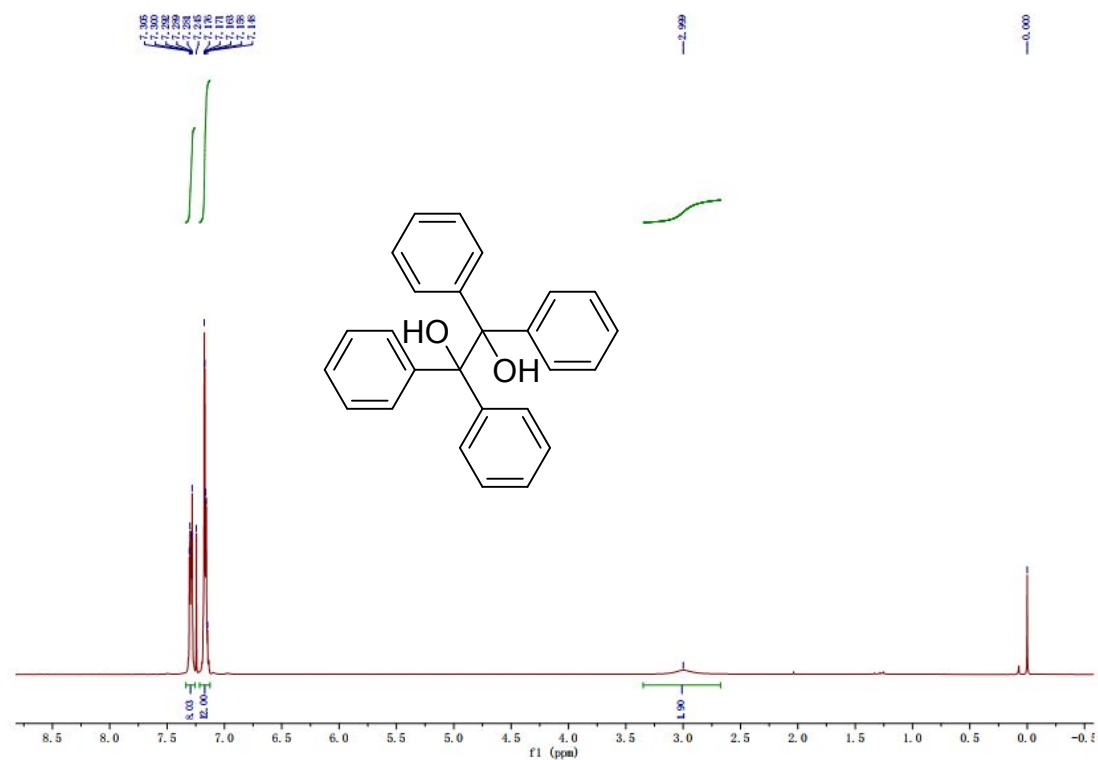

$^{13}\text{C}\{^1\text{H}\}$  NMR spectra of **7a** (100 MHz,  $\text{CDCl}_3$ ):

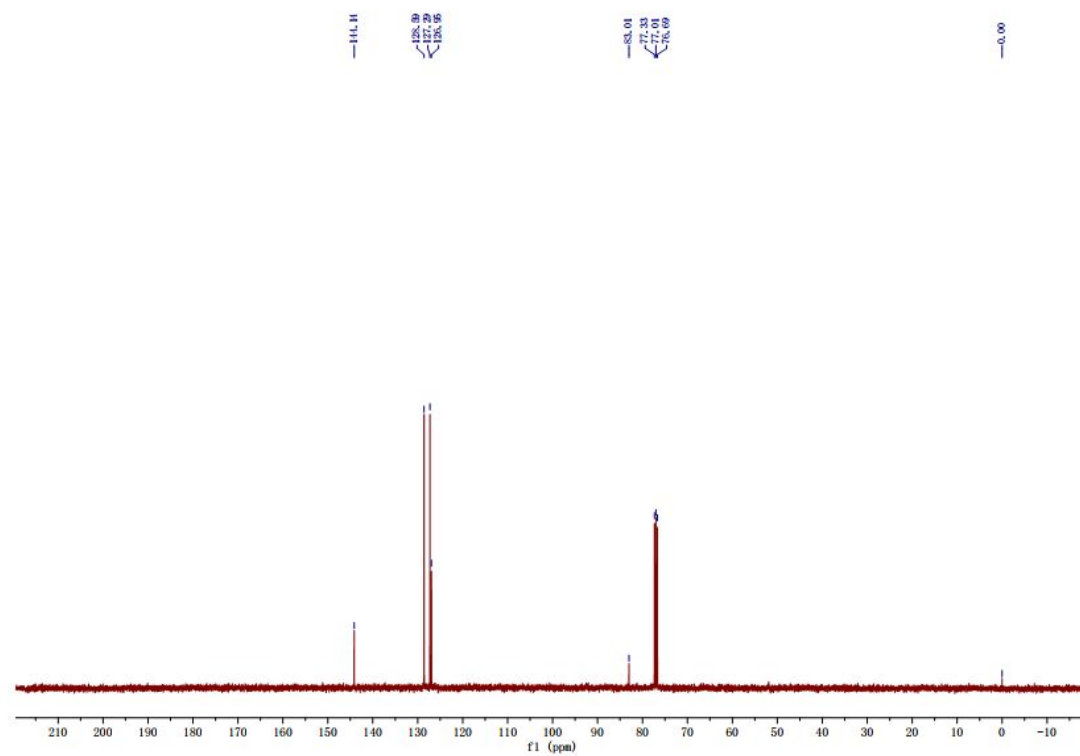

$^1\text{H}$  NMR spectra of **7b** (400 MHz,  $\text{CDCl}_3$ ):

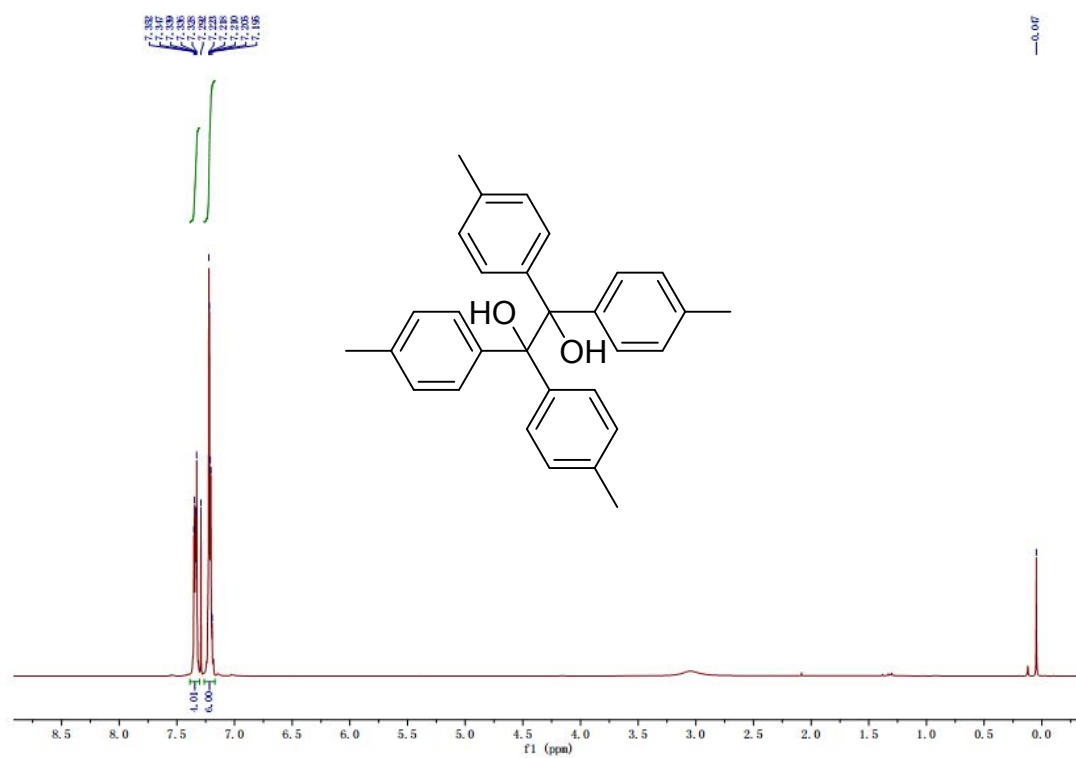

$^{13}\text{C}\{^1\text{H}\}$  NMR spectra of **7b** (100 MHz,  $\text{CDCl}_3$ ):

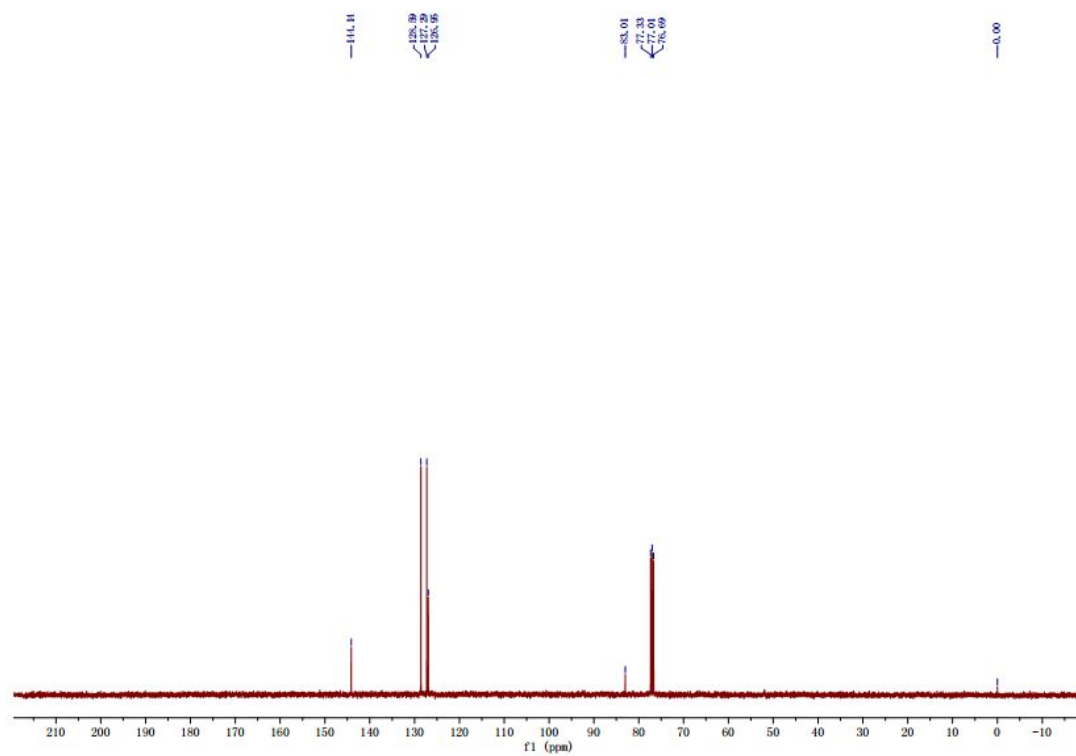



$^1\text{H}$  NMR spectra of **7c** (400 MHz,  $\text{CDCl}_3$ ):

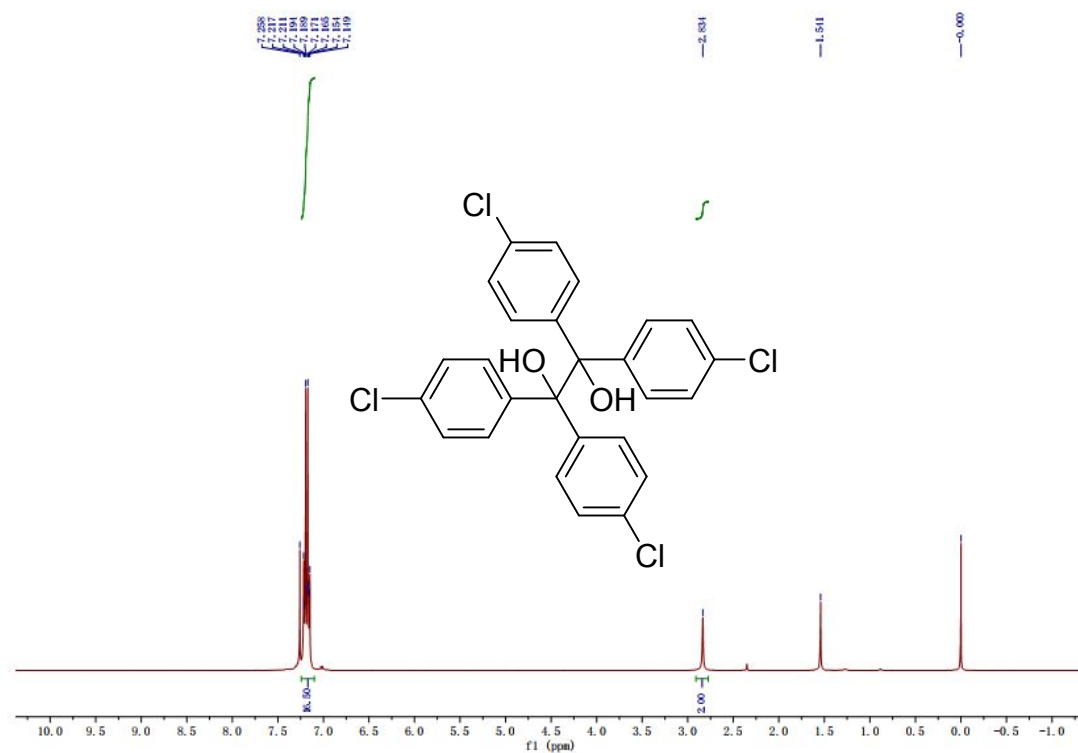

$^{13}\text{C}\{^1\text{H}\}$  NMR spectra of **7c** (100 MHz,  $\text{CDCl}_3$ ):

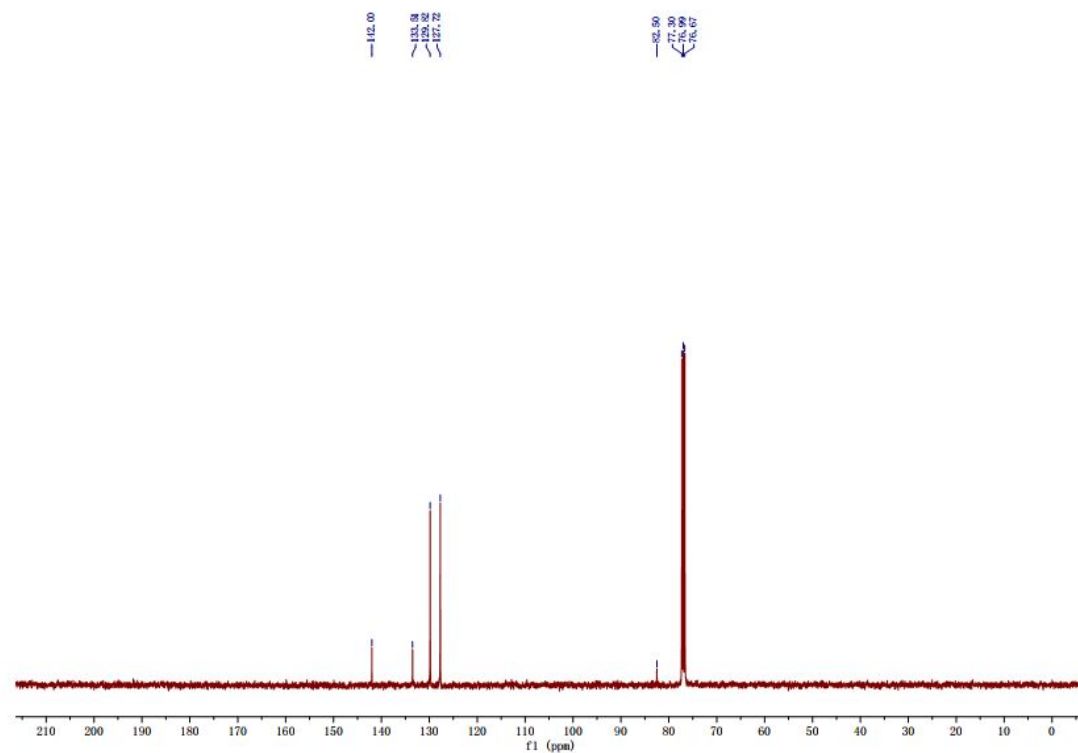

$^1\text{H}$  NMR spectra of **7d** (400 MHz,  $\text{CDCl}_3$ ):

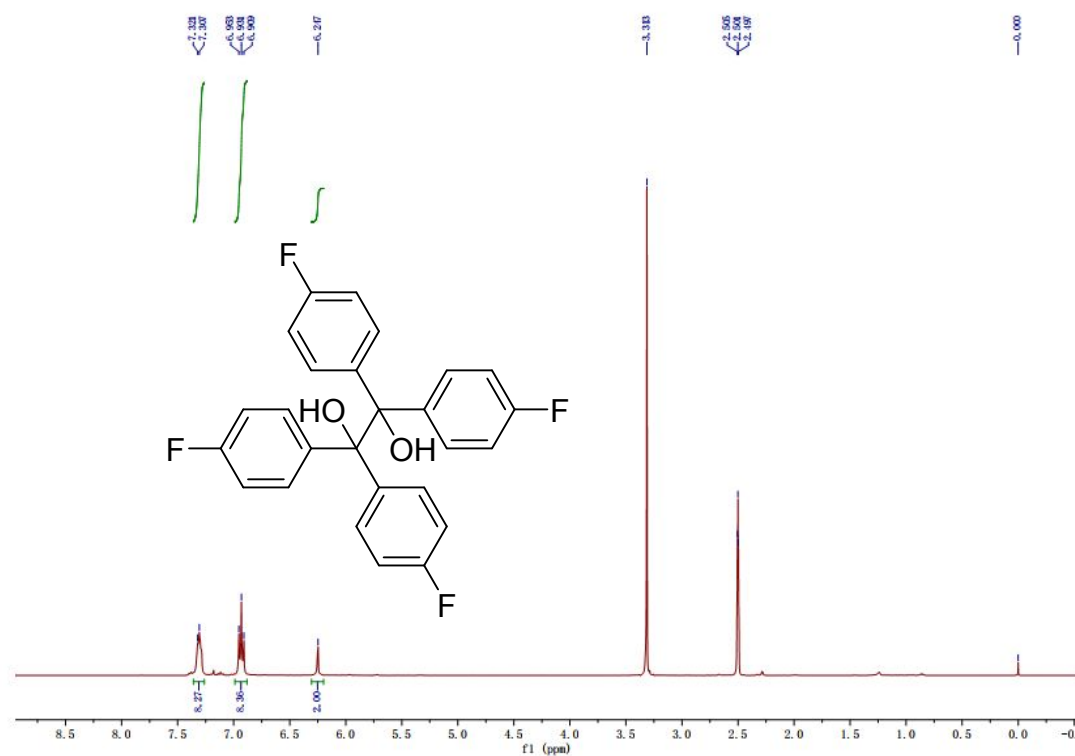

$^{13}\text{C}\{^1\text{H}\}$  NMR spectra of **7d** (100 MHz,  $\text{CDCl}_3$ ):

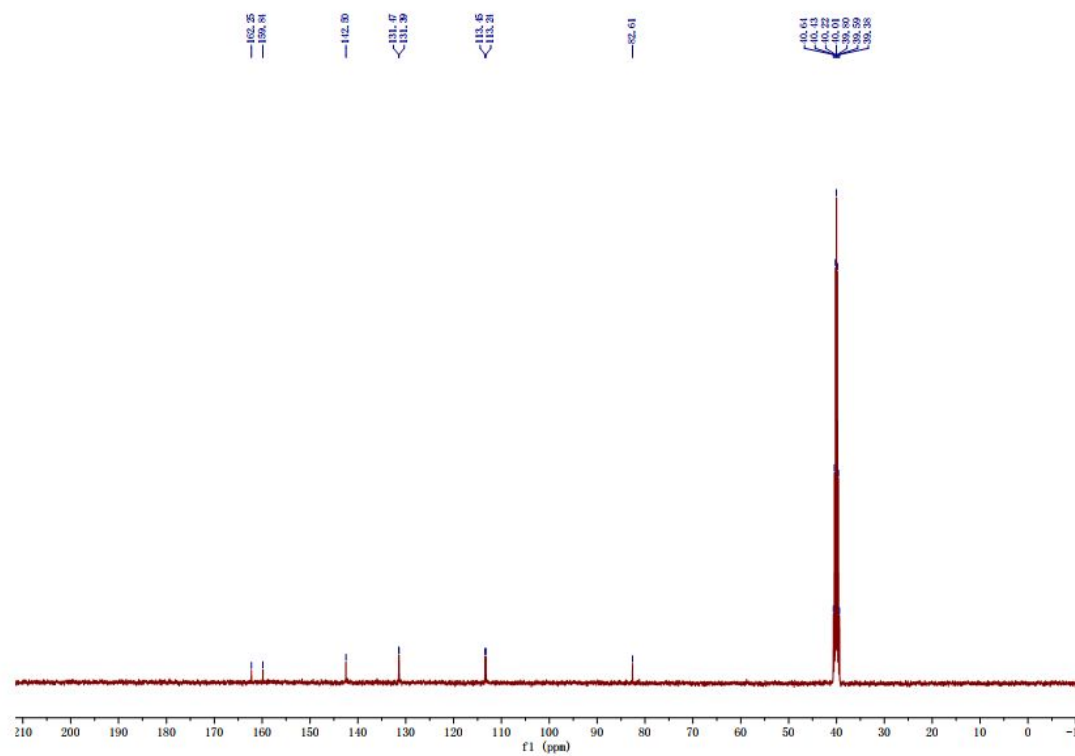

<sup>19</sup>F NMR spectra of **7d** (377 MHz, CDCl<sub>3</sub>):

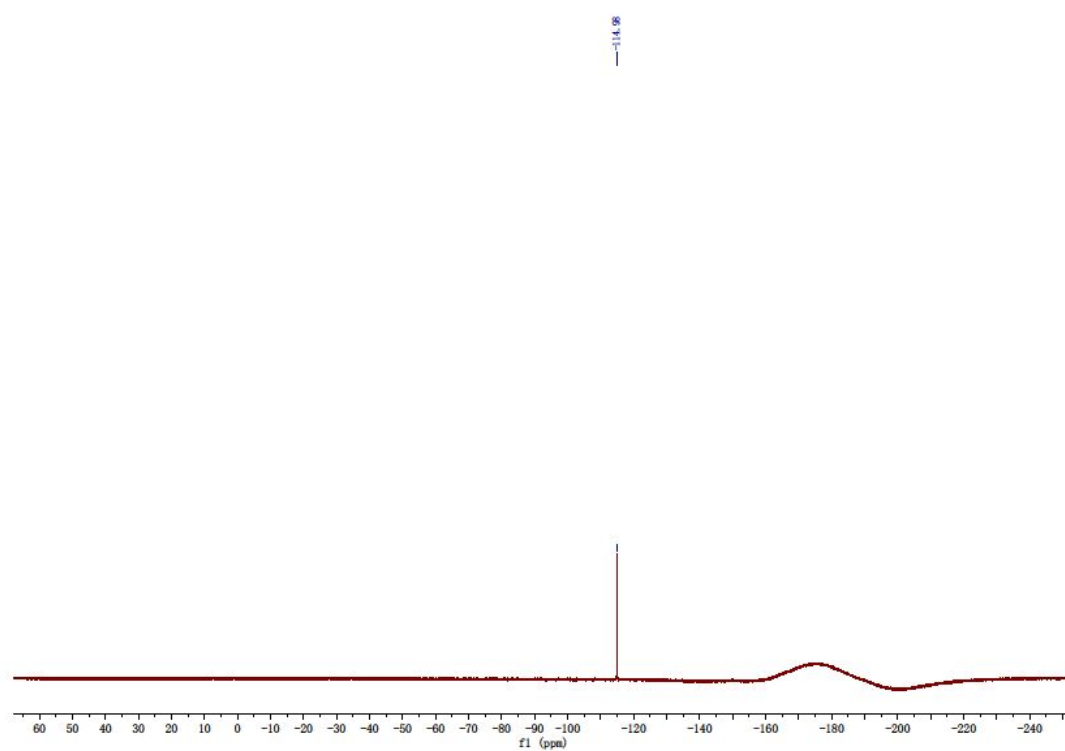

<sup>1</sup>H NMR spectra of **7e** (400 MHz, CDCl<sub>3</sub>):

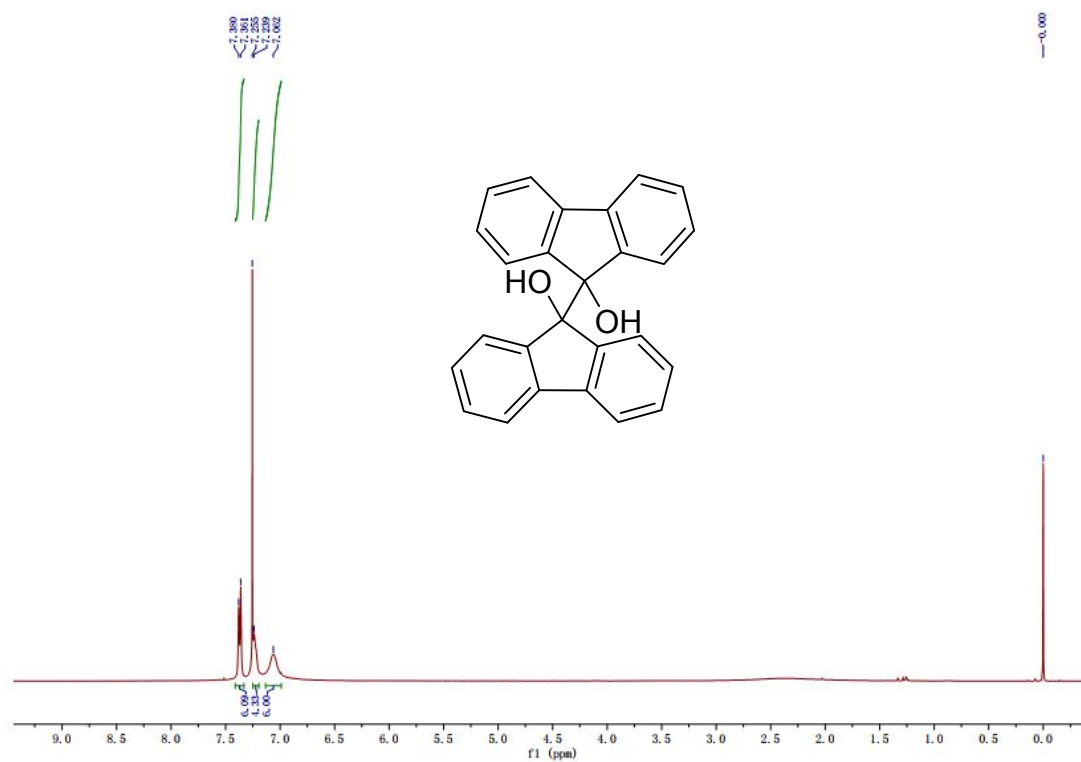

$^{13}\text{C}\{^1\text{H}\}$  NMR spectra of **7e** (100 MHz,  $\text{CDCl}_3$ ):

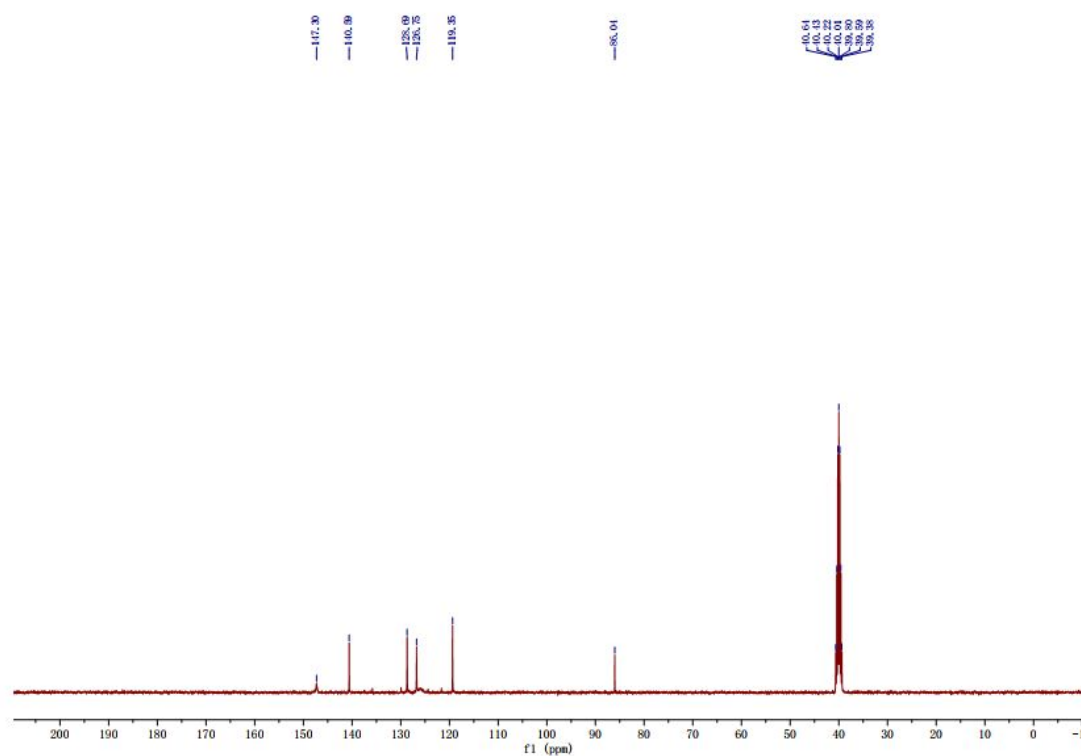

<sup>1</sup>H NMR spectra of **7f** (400 MHz, CDCl<sub>3</sub>):

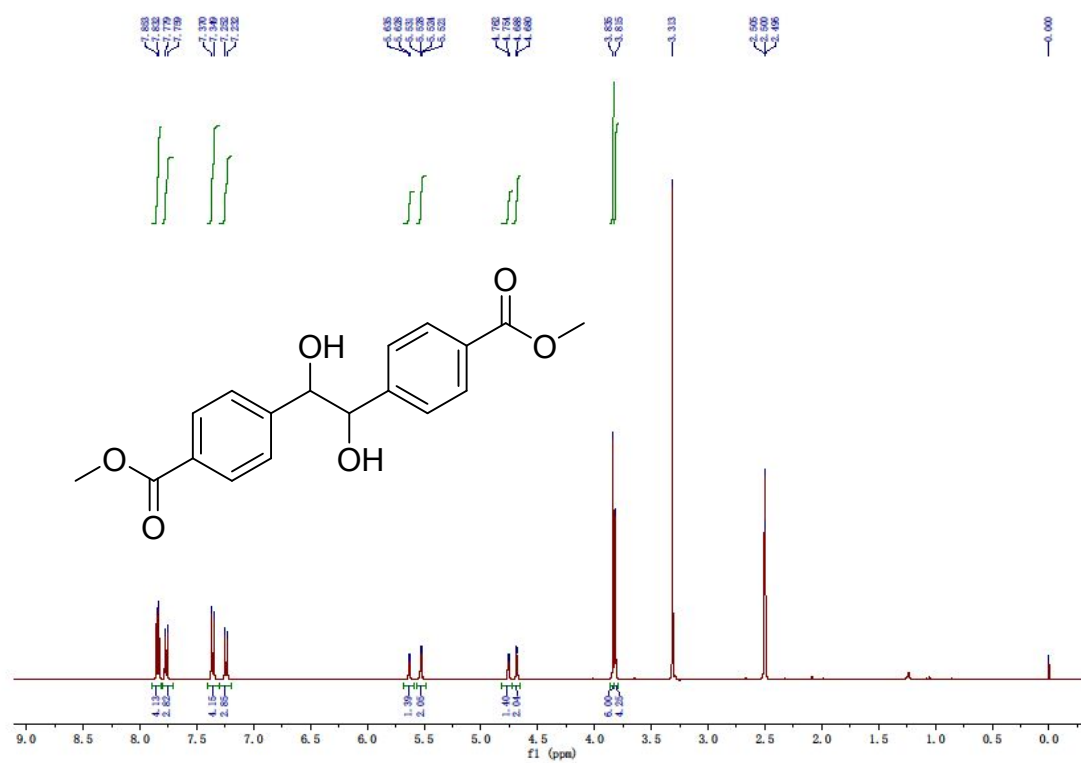

$^{13}\text{C}\{^1\text{H}\}$  NMR spectra of **7f** (100 MHz,  $\text{CDCl}_3$ ):

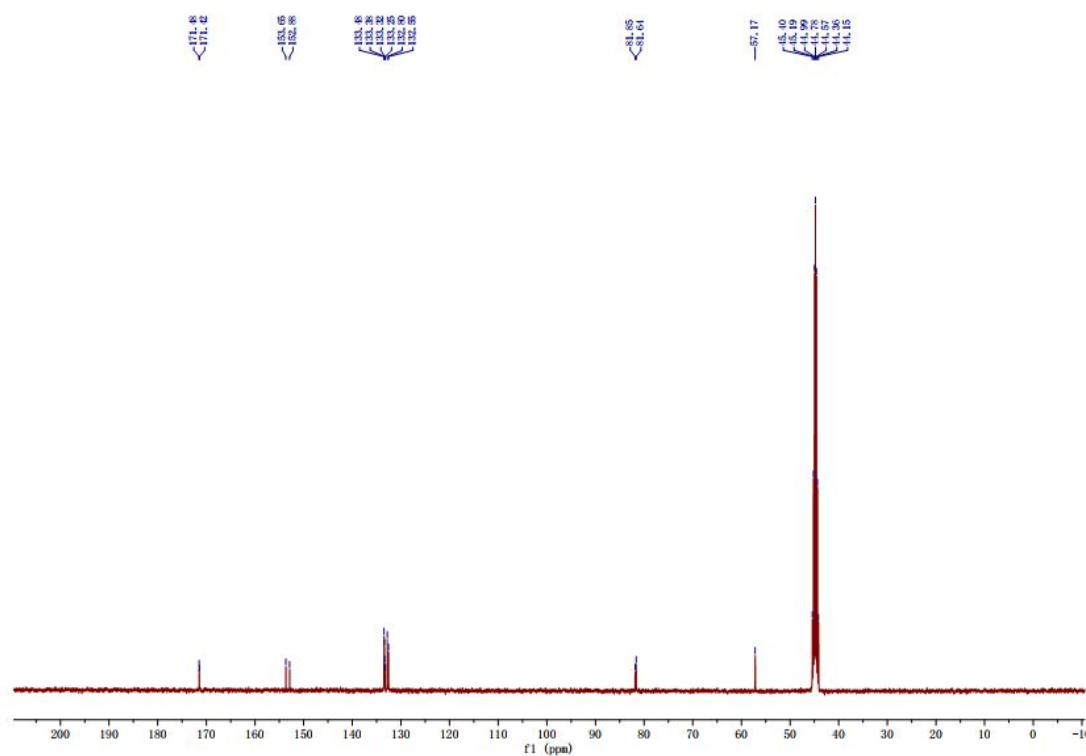

$^1\text{H}$  NMR spectra of **7g** (400 MHz,  $\text{CDCl}_3$ ):

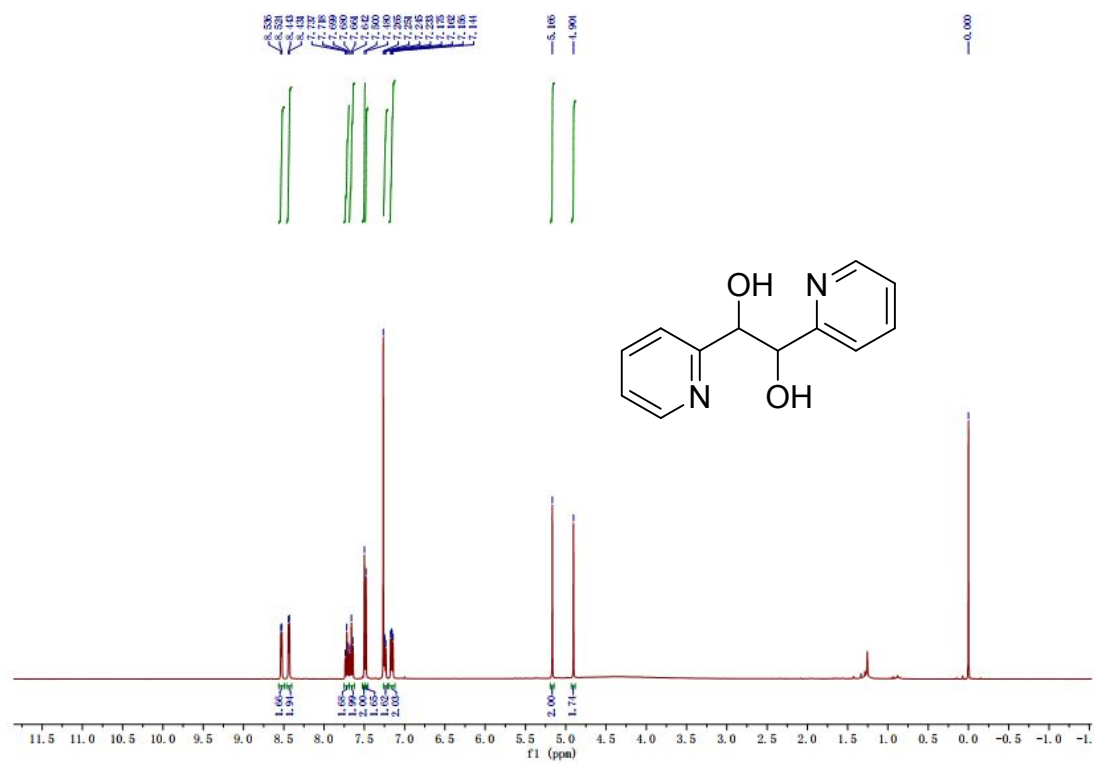

$^{13}\text{C}\{^1\text{H}\}$  NMR spectra of **7g** (100 MHz,  $\text{CDCl}_3$ ):

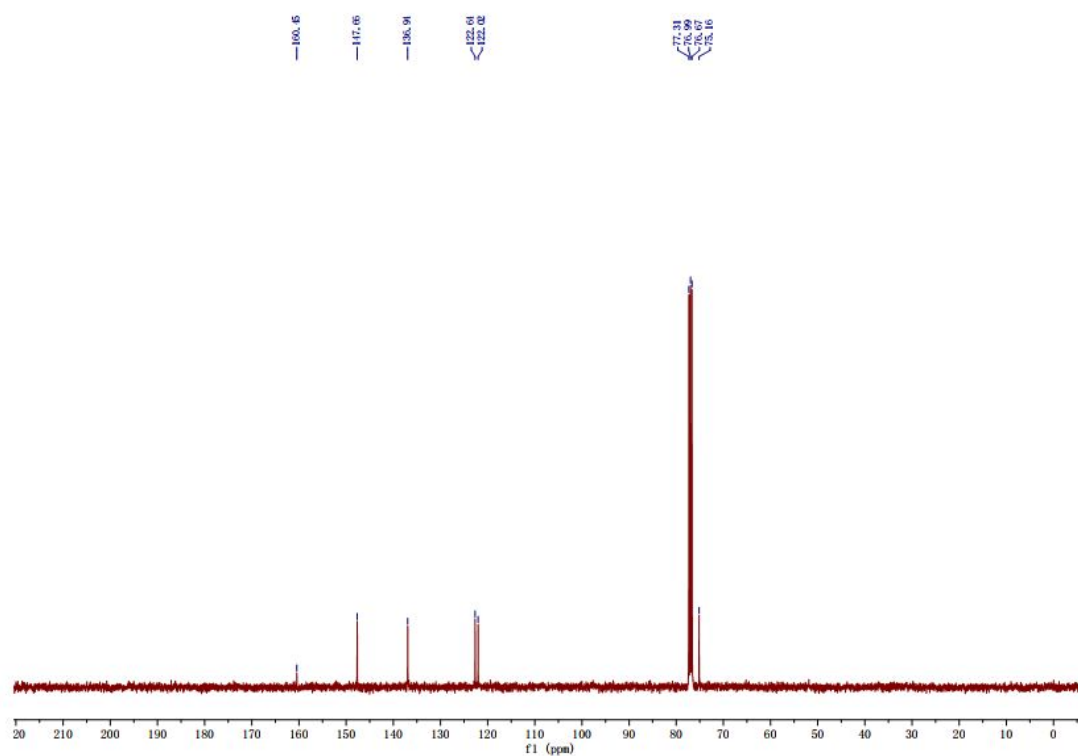

$^1\text{H}$  NMR spectra of **7h** (400 MHz,  $\text{CDCl}_3$ ):

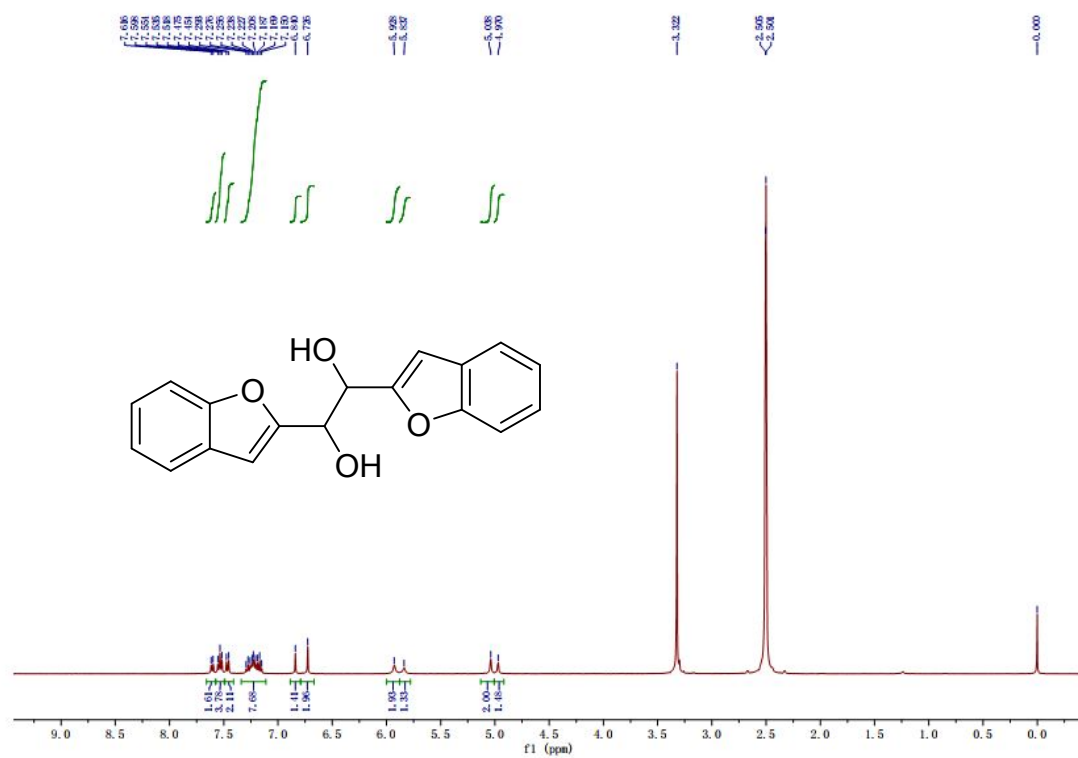

$^{13}\text{C}\{^1\text{H}\}$  NMR spectra of **7h** (100 MHz,  $\text{CDCl}_3$ ):

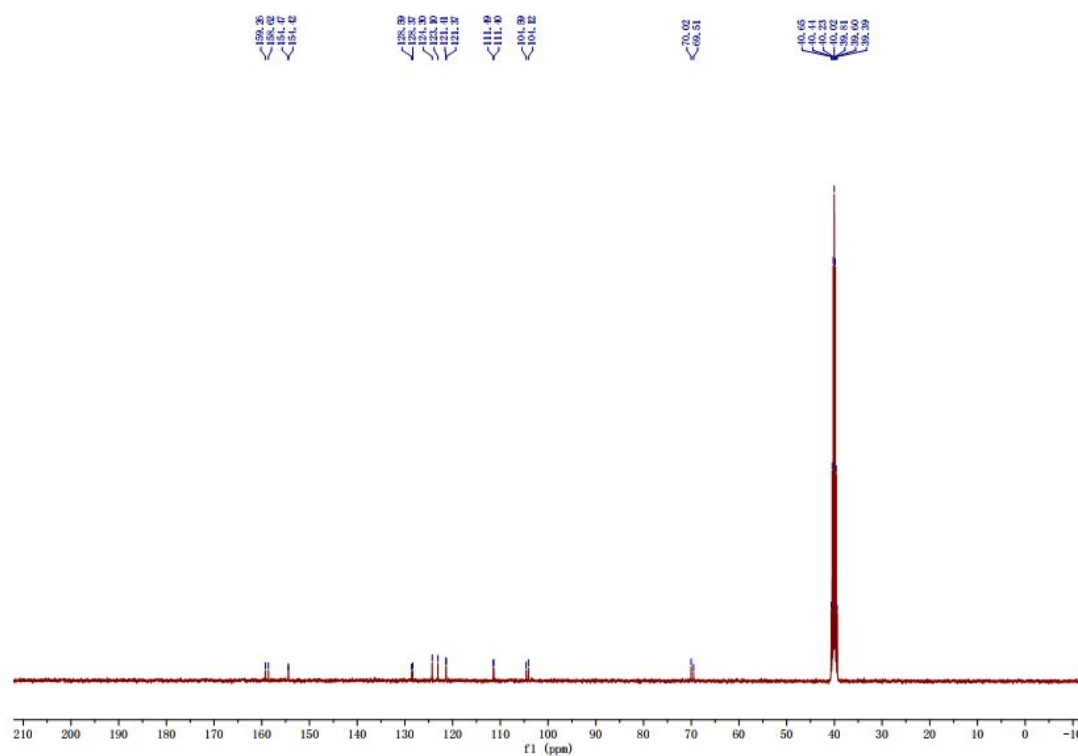

$^1\text{H}$  NMR spectra of **7i** (400 MHz,  $\text{CDCl}_3$ ):

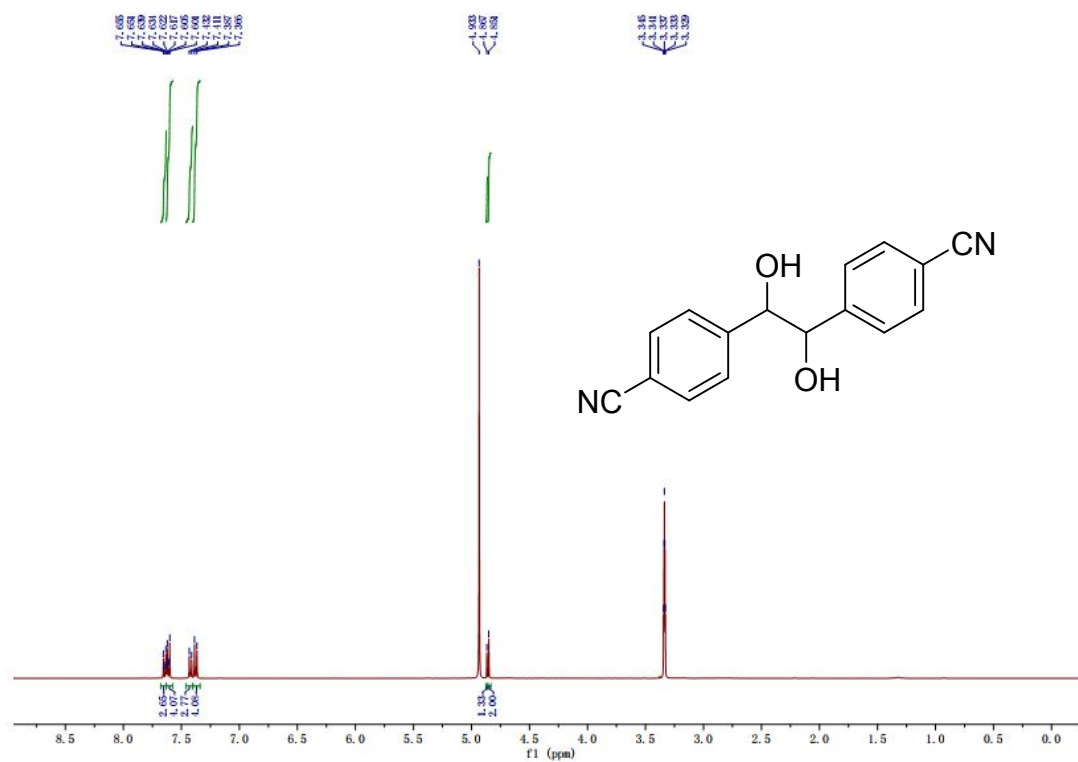

$^{13}\text{C}\{^1\text{H}\}$  NMR spectra of **7i** (100 MHz,  $\text{CDCl}_3$ ):

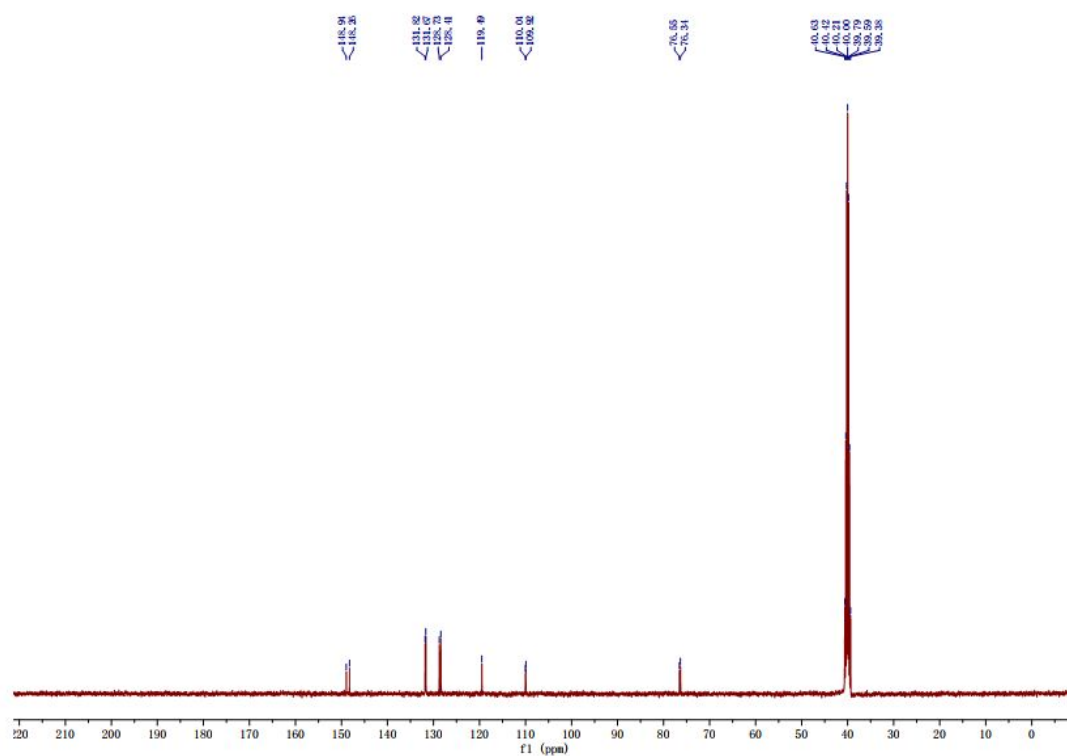

$^1\text{H}$  NMR spectra of **7j** (400 MHz,  $\text{CDCl}_3$ ):

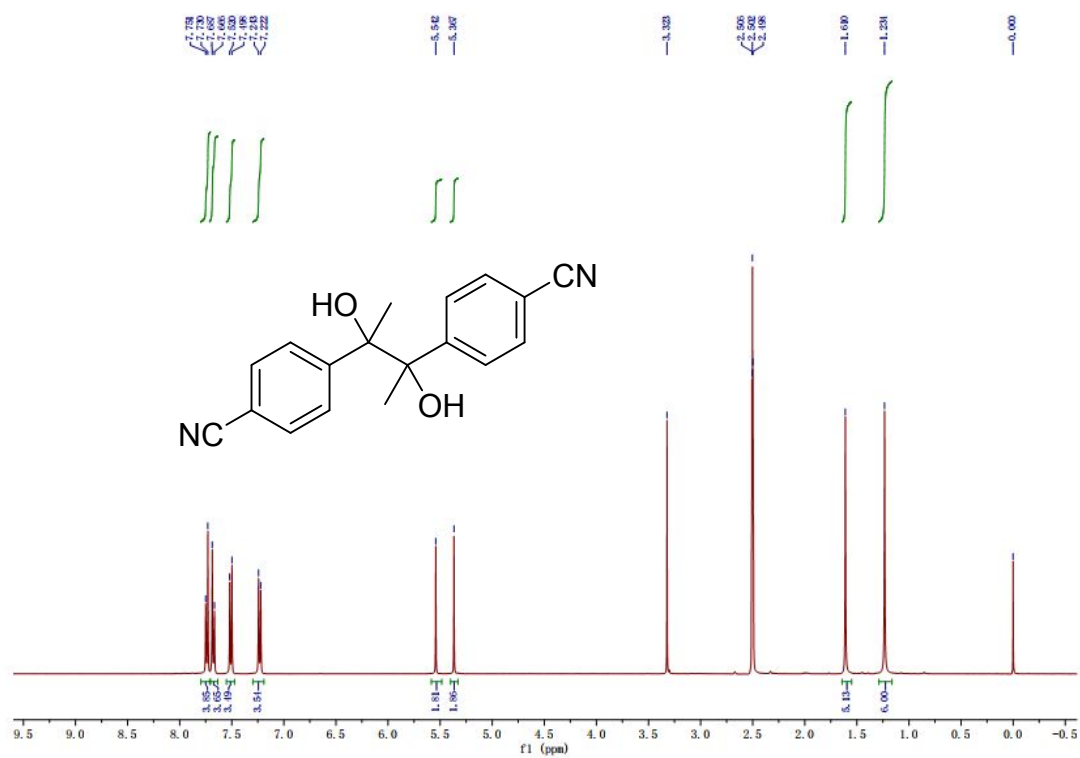



$^{13}\text{C}\{^1\text{H}\}$  NMR spectra of **7j** (100 MHz,  $\text{CDCl}_3$ ):

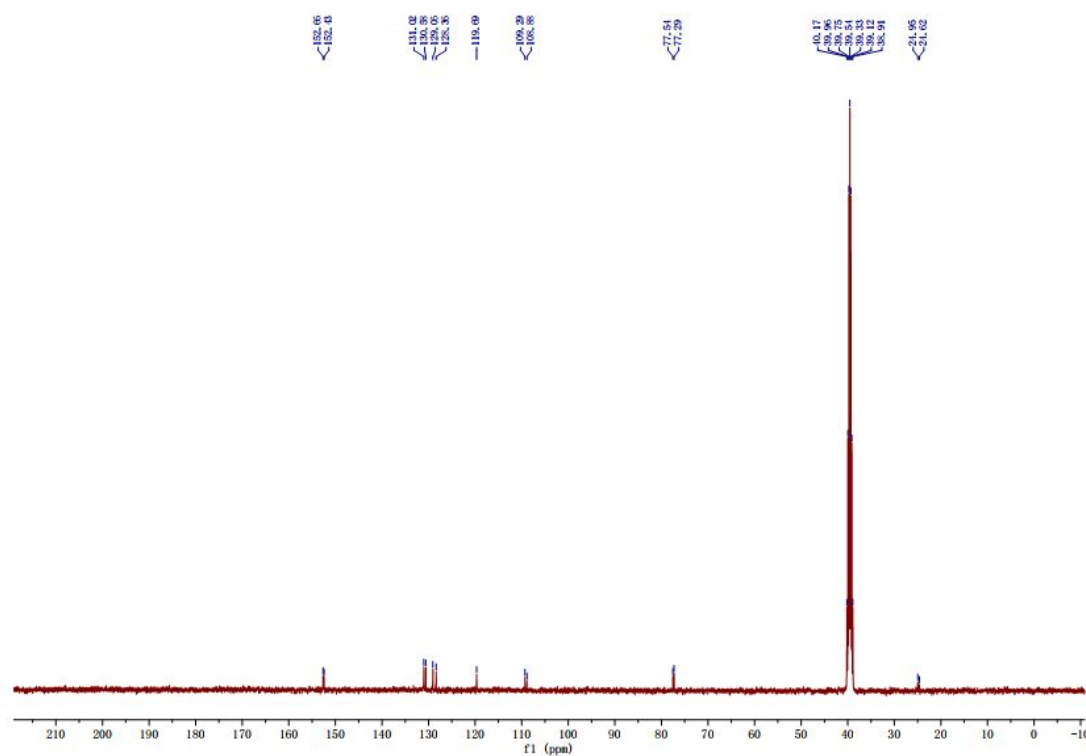

$^1\text{H}$  NMR spectra of **7k** (400 MHz,  $\text{CDCl}_3$ ):

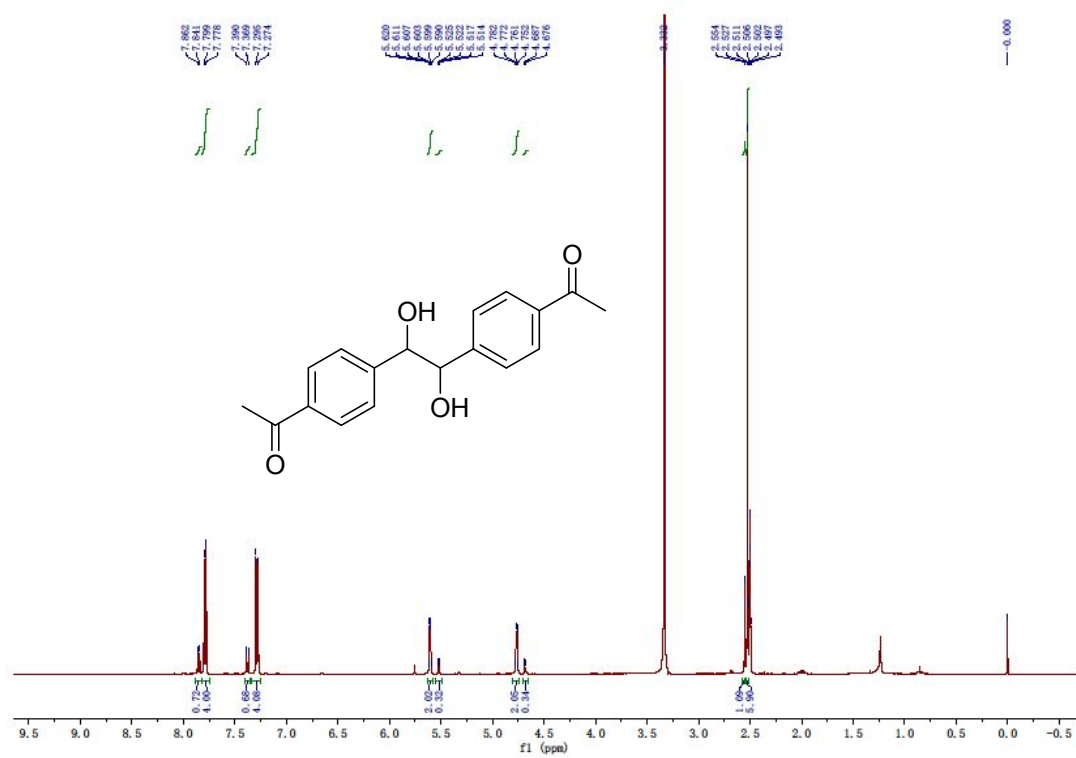

$^{13}\text{C}\{^1\text{H}\}$  NMR spectra of **7k** (100 MHz,  $\text{CDCl}_3$ ):

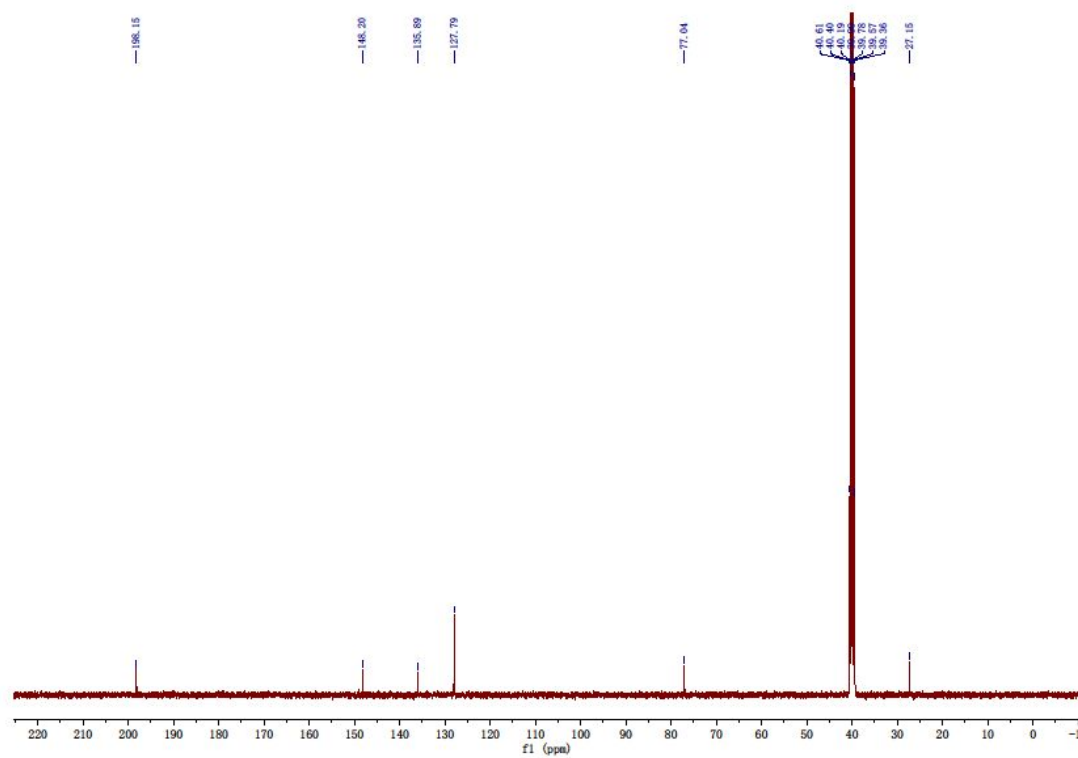

$^1\text{H}$  NMR spectra of **8** (400 MHz,  $\text{CDCl}_3$ ):

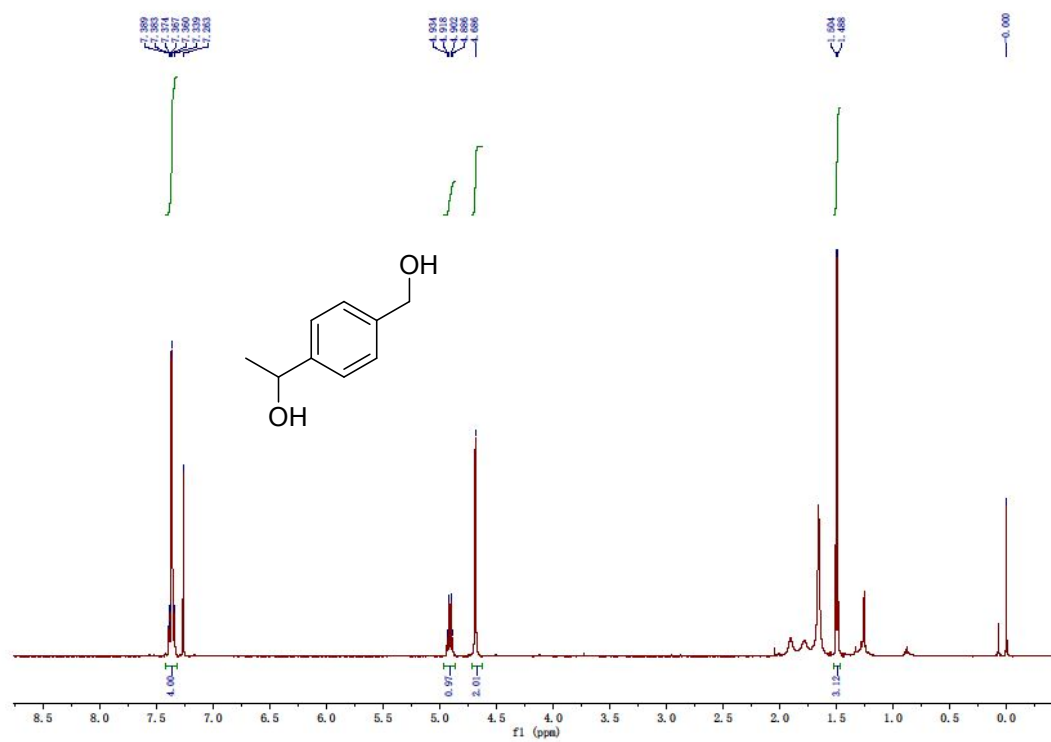

$^{13}\text{C}\{^1\text{H}\}$  NMR spectra of **8** (100 MHz,  $\text{CDCl}_3$ ):

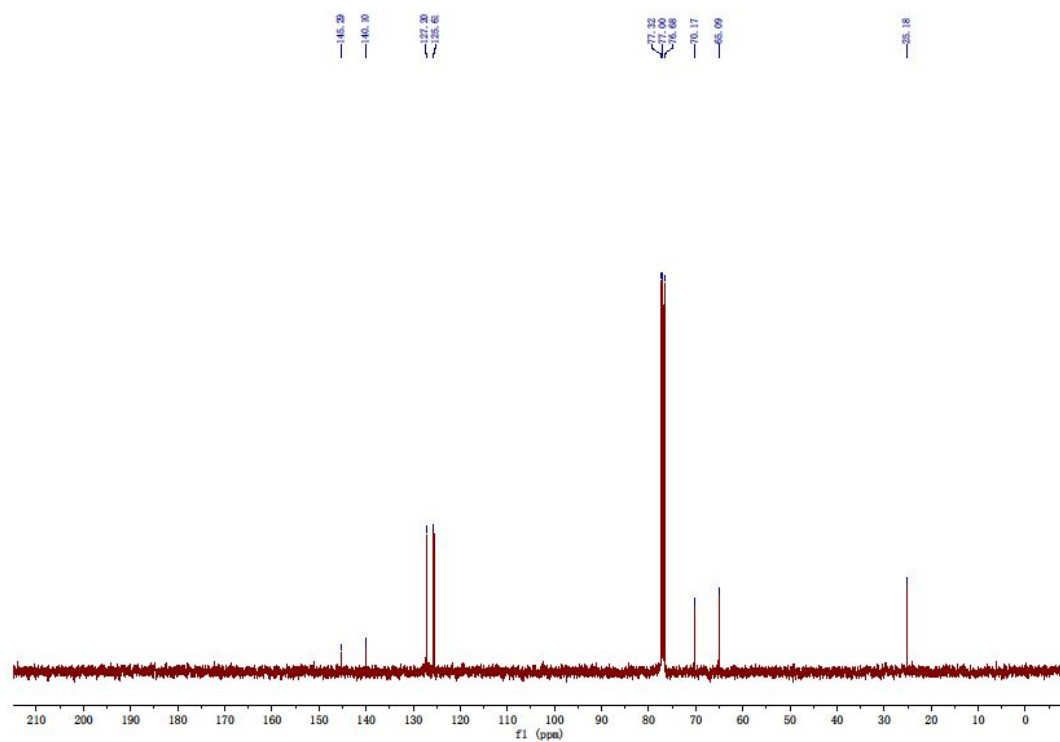

Supplement: Supplementary file 1 [file 25996495]
